# Supplementary material
Source: publisher site journal article supplement (https://www.dovepress.com/article/368417)
Supplement: Supplementary file 1 [file get_supplementary_file.php]

**Supplementary Material Table S1.** The detailed description of IRGs

| ImmPort database | InnateDB database | merged dataset |
| --- | --- | --- |
| A2M  ABCC4  ACKR1  ACKR2  ACKR3  ACKR4  ACO1  ACTA1  ACTG1  ACVR1B  ACVR1C  ACVR2A  ACVR2B  ACVRL1  ADA2  ADAR  ADCYAP1R1  ADIPOQ  ADIPOR1  ADIPOR2  ADM  ADM2  ADRB1  ADRB2  ADRM1  AEN  AGER  AGRP  AGT  AGTR1  AGTR2  AHNAK  AIMP1  AKT1  AKT2  AKT3  ALB  AMBN  AMELX  AMH  AMHR2  ANGPT1  ANGPT4  ANGPTL1  ANGPTL2  ANGPTL3  ANGPTL4  ANGPTL5  ANGPTL6  ANGPTL7  ANOS1  ANXA6  AP3B1  APLN  APLNR  APOBEC3A  APOBEC3C  APOBEC3F  APOBEC3G  APOBEC3H  APOD  APOH  APOM  AQP9  AR  ARAF  AREG  ARG2  ARRB1  ARTN  AVP  AVPR1A  AVPR1B  AVPR2  AZGP1  AZU1  B2M  BACH2  BCL10  BCL3  BDNF  BECN1  BID  BIRC5  BLNK  BMP1  BMP10  BMP15  BMP2  BMP3  BMP4  BMP5  BMP6  BMP7  BMP8A  BMP8B  BMPR1A  BMPR1B  BMPR2  BPHL  BPI  BPIFA1  BPIFA2  BPIFA3  BPIFB1  BPIFB2  BPIFB3  BPIFB4  BPIFB6  BPIFC  BRAF  BRD8  BST2  BTC  BTK  C3  C3AR1  C5  C5AR1  C5AR2  C8G  CACYBP  CALCA  CALCB  CALCR  CALCRL  CALR  CAMP  CANX  CARD11  CASP3  CAT  CBL  CBLB  CBLC  CCK  CCL1  CCL11  CCL13  CCL14  CCL15  CCL15-CCL14  CCL16  CCL17  CCL18  CCL19  CCL2  CCL20  CCL21  CCL22  CCL23  CCL24  CCL25  CCL26  CCL27  CCL28  CCL3  CCL3L1  CCL3L3  CCL3P1  CCL4  CCL4L1  CCL4L2  CCL5  CCL7  CCL8  CCN1  CCN2  CCN3  CCR1  CCR10  CCR3  CCR4  CCR5  CCR6  CCR7  CCR8  CCR9  CCRL2  CD14  CD19  CD1A  CD1B  CD1C  CD1D  CD1E  CD209  CD22  CD244  CD247  CD28  CD320  CD3D  CD3E  CD3G  CD4  CD40  CD40LG  CD48  CD70  CD72  CD74  CD79A  CD79B  CD81  CD86  CD8A  CD8B  CDC42  CDH1  CDK4  CDNF  CELA1  CER1  CETP  CGA  CGB1  CGB2  CGB3  CGB5  CGB7  CGB8  CHGA  CHGB  CHIT1  CHP1  CHP2  CHUK  CIITA  CKLF  CLCF1  CLDN4  CLEC11A  CLEC4M  CMA1  CMKLR1  CMTM1  CMTM2  CMTM3  CMTM4  CMTM5  CMTM6  CMTM7  CMTM8  CNTF  CNTFR  COLEC10  COLEC12  CORT  CR2  CRABP1  CRABP2  CREB1  CRH  CRHR1  CRHR2  CRIM1  CRLF1  CRLF2  CRLF3  CRP  CSF1  CSF1R  CSF2  CSF2RA  CSF2RB  CSF3  CSF3R  CSH1  CSH2  CSHL1  CSK  CSPG5  CSRP1  CST4  CTF1  CTLA4  CTSB  CTSE  CTSG  CTSL  CTSS  CX3CL1  CX3CR1  CXCL1  CXCL10  CXCL11  CXCL12  CXCL13  CXCL14  CXCL16  CXCL17  CXCL2  CXCL3  CXCL5  CXCL6  CXCL8  CXCL9  CXCR1  CXCR2  CXCR3  CXCR4  CXCR5  CXCR6  CYBB  CYLD  CYSLTR1  CYSLTR2  DAXX  DCD  DCK  DDX17  DDX58  DEFA1  DEFA1A3  DEFA1B  DEFA3  DEFA4  DEFA5  DEFA6  DEFA7P  DEFB1  DEFB103A  DEFB103B  DEFB104A  DEFB104B  DEFB105A  DEFB105B  DEFB106A  DEFB106B  DEFB107A  DEFB107B  DEFB108B  DEFB108F  DEFB110  DEFB112  DEFB113  DEFB114  DEFB115  DEFB116  DEFB117  DEFB118  DEFB119  DEFB121  DEFB123  DEFB124  DEFB125  DEFB126  DEFB127  DEFB128  DEFB129  DEFB130A  DEFB130B  DEFB131A  DEFB131B  DEFB131C  DEFB132  DEFB133  DEFB134  DEFB135  DEFB136  DEFB4A  DEFB4B  DES  DHX58  DKK1  DLL4  DMBT1  DUOX1  DUOX2  EBI3  ECD  ECPAS  EDN1  EDN2  EDN3  EDNRA  EDNRB  EED  EGF  EGFR  EIF2AK2  ELANE  ELAVL1  ELN  ENDOU  ENG  EPGN  EPO  EPOR  EPPIN  ERAP1  ERAP2  EREG  ESM1  ESR1  ESR2  ESRRA  ESRRB  ESRRG  F2R  F2RL1  FABP12  FABP2  FABP3  FABP4  FABP5  FABP6  FABP7  FABP9  FAM3B  FAM3C  FAM3D  FAS  FASLG  FCER1G  FCGR2B  FCGR3A  FCGR3B  FCGRT  FCN2  FGA  FGF1  FGF10  FGF11  FGF12  FGF13  FGF14  FGF16  FGF17  FGF18  FGF19  FGF2  FGF20  FGF21  FGF22  FGF23  FGF3  FGF4  FGF5  FGF6  FGF7  FGF7P3  FGF7P6  FGF8  FGF9  FGFR1  FGFR2  FGFR3  FGFR4  FGFRL1  FGR  FIGNL2  FLT1  FLT3  FLT3LG  FLT4  FOS  FPR1  FPR2  FSHB  FSHR  FURIN  FYN  GAL  GALP  GALR2  GALR3  GAST  GBP2  GCG  GCGR  GDF1  GDF10  GDF11  GDF15  GDF2  GDF3  GDF5  GDF6  GDF7  GDF9  GDNF  GFAP  GH1  GH2  GHR  GHRH  GHRHR  GHRL  GHSR  GIP  GIPR  GKN1  GLP1R  GLP2R  GMFB  GMFG  GNAI1  GNLY  GNRH1  GNRH2  GNRHR  GPER1  GPHA2  GPHB5  GPI  GPR17  GPR32  GPR33  GRAP2  GRB2  GREM1  GREM2  GRK2  GRN  GRP  GSK3B  GUCA2A  GZMB  HAMP  HBEGF  HCK  HCST  HDAC1  HDGF  HDGFL3  HFE  HGF  HJV  HLA-A  HLA-B  HLA-C  HLA-DMA  HLA-DMB  HLA-DOA  HLA-DOB  HLA-DPA1  HLA-DPB1  HLA-DQA1  HLA-DQA2  HLA-DQB1  HLA-DRA  HLA-DRB1  HLA-DRB3  HLA-DRB4  HLA-DRB5  HLA-E  HLA-F  HLA-G  HLA-H  HMGB1  HMOX1  HNF4A  HNF4G  HRAS  HRG  HSP90AA1  HSP90AB1  HSPA1A  HSPA1B  HSPA1L  HSPA2  HSPA4  HSPA5  HSPA6  HSPA8  HTN1  HTN3  HTR1A  HTR3A  HTR3B  HTR3C  HTR3D  HTR3E  IAPP  ICAM1  ICAM2  ICOS  IDO1  IFI30  IFIH1  IFITM1  IFN1@  IFNA1  IFNA10  IFNA13  IFNA14  IFNA16  IFNA17  IFNA2  IFNA21  IFNA4  IFNA5  IFNA6  IFNA7  IFNA8  IFNAR1  IFNAR2  IFNB1  IFNE  IFNG  IFNGR1  IFNGR2  IFNK  IFNL1  IFNL2  IFNL3  IFNLR1  IFNW1  IGF1  IGF1R  IGF2  IGF2R  IGH  IGHA1  IGHA2  IGHD  IGHD1-1  IGHD1-14  IGHD1-20  IGHD1-26  IGHD1-7  IGHD2-15  IGHD2-2  IGHD2-21  IGHD2-8  IGHD3-10  IGHD3-16  IGHD3-22  IGHD3-3  IGHD3-9  IGHD4-11  IGHD4-17  IGHD4-23  IGHD4-4  IGHD5-12  IGHD5-18  IGHD5-24  IGHD5-5  IGHD6-13  IGHD6-19  IGHD6-25  IGHD6-6  IGHD7-27  IGHE  IGHG1  IGHG2  IGHG3  IGHG4  IGHJ1  IGHJ2  IGHJ3  IGHJ4  IGHJ5  IGHJ6  IGHM  IGHV1-18  IGHV1-2  IGHV1-24  IGHV1-3  IGHV1-38-4  IGHV1-45  IGHV1-46  IGHV1-58  IGHV1-69  IGHV1-69-2  IGHV1-8  IGHV2-26  IGHV2-5  IGHV2-70  IGHV3-11  IGHV3-13  IGHV3-15  IGHV3-16  IGHV3-20  IGHV3-21  IGHV3-23  IGHV3-30  IGHV3-30-3  IGHV3-30-5  IGHV3-33  IGHV3-35  IGHV3-38  IGHV3-38-3  IGHV3-43  IGHV3-48  IGHV3-49  IGHV3-53  IGHV3-64  IGHV3-66  IGHV3-69-1  IGHV3-7  IGHV3-72  IGHV3-73  IGHV3-74  IGHV3-9  IGHV4-28  IGHV4-30-1  IGHV4-30-2  IGHV4-30-4  IGHV4-31  IGHV4-34  IGHV4-38-2  IGHV4-39  IGHV4-4  IGHV4-59  IGHV4-61  IGHV5-10-1  IGHV5-51  IGHV6-1  IGHV7-4-1  IGHV7-81  IGK  IGKC  IGKDEL  IGKJ  IGKJ1  IGKJ2  IGKJ3  IGKJ4  IGKJ5  IGKV@  IGKV1-12  IGKV1-13  IGKV1-16  IGKV1-17  IGKV1-27  IGKV1-33  IGKV1-37  IGKV1-39  IGKV1-5  IGKV1-6  IGKV1-8  IGKV1-9  IGKV1D-12  IGKV1D-13  IGKV1D-16  IGKV1D-17  IGKV1D-33  IGKV1D-37  IGKV1D-39  IGKV1D-42  IGKV1D-43  IGKV1D-8  IGKV2-24  IGKV2-28  IGKV2-30  IGKV2-40  IGKV2D-24  IGKV2D-28  IGKV2D-29  IGKV2D-30  IGKV2D-40  IGKV3-11  IGKV3-15  IGKV3-20  IGKV3-7  IGKV3D-11  IGKV3D-15  IGKV3D-20  IGKV3D-7  IGKV4-1  IGKV5-2  IGKV6-21  IGKV6D-21  IGKV6D-41  IGL  IGLC1  IGLC2  IGLC3  IGLC6  IGLC7  IGLJ  IGLJ1  IGLJ2  IGLJ3  IGLJ4  IGLJ5  IGLJ6  IGLJ7  IGLV@  IGLV10-54  IGLV11-55  IGLV1-36  IGLV1-40  IGLV1-44  IGLV1-47  IGLV1-50  IGLV1-51  IGLV2-11  IGLV2-14  IGLV2-18  IGLV2-23  IGLV2-33  IGLV2-8  IGLV3-1  IGLV3-10  IGLV3-12  IGLV3-16  IGLV3-19  IGLV3-21  IGLV3-22  IGLV3-25  IGLV3-27  IGLV3-32  IGLV3-9  IGLV4-3  IGLV4-60  IGLV4-69  IGLV5-37  IGLV5-39  IGLV5-45  IGLV5-48  IGLV5-52  IGLV6-57  IGLV7-43  IGLV7-46  IGLV8-61  IGLV9-49  IKBKB  IKBKE  IKBKG  IL10  IL10RA  IL10RB  IL11  IL11RA  IL12A  IL12B  IL12RB1  IL12RB2  IL13  IL13RA1  IL13RA2  IL15  IL15RA  IL16  IL17A  IL17B  IL17C  IL17D  IL17F  IL17RA  IL17RB  IL17RC  IL17RD  IL17RE  IL18  IL18R1  IL18RAP  IL19  IL1A  IL1B  IL1F10  IL1R1  IL1R2  IL1RAP  IL1RL1  IL1RL2  IL1RN  IL2  IL20  IL20RA  IL20RB  IL21  IL21R  IL22  IL22RA1  IL22RA2  IL23A  IL23R  IL24  IL25  IL26  IL27  IL27RA  IL2RA  IL2RB  IL2RG  IL3  IL31  IL31RA  IL32  IL33  IL34  IL36A  IL36B  IL36G  IL36RN  IL37  IL3RA  IL4  IL4R  IL5  IL5RA  IL6  IL6R  IL6ST  IL7  IL7R  IL9  IL9R  ILK  INHA  INHBA  INHBB  INHBC  INHBE  INPP5D  INS  INS-IGF2  INSL3  INSL4  INSL5  INSL6  INSR  IREB2  IRF1  IRF3  IRF5  IRF7  IRF9  ISG15  ISG20  ISG20L2  ITGAL  ITGAV  ITGB2  ITK  JAG1  JAG2  JAK1  JAK2  JUN  JUND  KCNH2  KDR  KIR2DL1  KIR2DL2  KIR2DL3  KIR2DL4  KIR2DL5A  KIR2DS1  KIR2DS3  KIR2DS4  KIR2DS5  KIR3DL1  KIR3DL2  KIR3DL3  KITLG  KL  KLKB1  KLRC1  KLRC2  KLRC3  KLRC4  KLRD1  KLRK1  KNG1  KRAS  LACRT  LALBA  LANCL1  LAT  LBP  LCK  LCN1  LCN10  LCN12  LCN15  LCN1P1  LCN2  LCN6  LCN8  LCN9  LCNL1  LCP2  LEAP2  LECT2  LEFTY1  LEFTY2  LEP  LEPR  LGMN  LGR4  LGR5  LGR6  LHB  LHCGR  LIF  LIFR  LILRB3  LIMS1  LMBR1  LMBR1L  LPA  LRP1  LRSAM1  LTA  LTB  LTB4R  LTB4R2  LTBP1  LTBP2  LTBP3  LTBP4  LTBR  LTF  LYN  LYZ  MALT1  MANF  MAP2K1  MAP2K2  MAP3K14  MAP3K8  MAPK1  MAPK14  MAPK3  MAPK8  MAPT  MARCO  MASP1  MASP2  MAVS  MBL2  MBL3P  MC1R  MC2R  MC3R  MC4R  MCHR1  MCHR2  MDK  MET  MIA  MICA  MICB  MIF  MLN  MLNR  MMP12  MMP9  MPL  MPO  MR1  MSR1  MSTN  MTNR1A  MTNR1B  MUC4  MUC5AC  MX1  MX2  MYDGF  NAMPT  NCK1  NCK2  NCR1  NCR2  NCR3  NDP  NDRG1  NEDD4  NENF  NEO1  NEWENTRY  NFAT5  NFATC1  NFATC2  NFATC3  NFATC4  NFKB1  NFKBIA  NFKBIB  NFKBIE  NFKBIZ  NFYA  NFYB  NFYC  NGF  NGFR  NLRX1  NMB  NMBR  NOD1  NOD2  NODAL  NOS1  NOS2  NOX1  NOX3  NOX4  NOX5  NPFF  NPPA  NPPB  NPPC  NPR1  NPR3  NPY  NR0B1  NR0B2  NR1D1  NR1D2  NR1H2  NR1H3  NR1H4  NR1I2  NR1I3  NR2C1  NR2C2  NR2E1  NR2E3  NR2F1  NR2F2  NR2F6  NR3C1  NR3C2  NR4A1  NR4A2  NR4A3  NR5A1  NR5A2  NR6A1  NRAS  NRG1  NRG2  NRG3  NRG4  NRP1  NRP2  NRTN  NTF3  NTF4  NTS  NUDT6  OAS1  OASL  OBP2A  OBP2B  OGFR  OGN  OLR1  OPRD1  OPRK1  OPRL1  OPRM1  ORM1  ORM2  OSGIN1  OSM  OSMR  OSTN  OXT  OXTR  PAEP  PAK1  PAK2  PAK3  PAK4  PAK5  PAK6  PCSK1  PCSK2  PDCD1  PDF  PDGFA  PDGFB  PDGFC  PDGFD  PDGFRA  PDGFRB  PDGFRL  PDIA2  PDIA3  PDK1  PDYN  PENK  PF4  PF4V1  PGC  PGF  PGLYRP1  PGLYRP2  PGLYRP3  PGLYRP4  PGR  PGRMC2  PI15  PI3  PIK3CA  PIK3CB  PIK3CD  PIK3CG  PIK3R1  PIK3R2  PIK3R3  PIK3R5  PLA2G2A  PLAAT4  PLAU  PLAUR  PLCG1  PLCG2  PLSCR1  PLTP  PLXNA1  PLXNA2  PLXNA3  PLXNA4  PLXNB1  PLXNB2  PLXNB3  PLXNC1  PLXND1  PMCH  PML  PMP2  PNOC  POMC  PPARA  PPARD  PPARG  PPBP  PPBPP1  PPBPP2  PPIA  PPP3CA  PPP3CB  PPP3CC  PPP3R1  PPP3R2  PPP4C  PPY  PRDX1  PRDX2  PRF1  PRKCA  PRKCB  PRKCG  PRKCQ  PRL  PRLH  PRLHR  PRLR  PROC  PROCR  PROK1  PROK2  PRTN3  PSMB8  PSMC1  PSMC2  PSMC3  PSMC4  PSMC5  PSMC6  PSMD1  PSMD10  PSMD11  PSMD13  PSMD14  PSMD2  PSMD3  PSMD4  PSMD5  PSMD6  PSMD7  PSMD8  PSME1  PSME2  PSME3  PSPN  PTAFR  PTGDR  PTGDR2  PTGDS  PTGER1  PTGER2  PTGER3  PTGER4  PTGFR  PTGS2  PTH  PTH1R  PTH2  PTH2R  PTHLH  PTK2  PTK2B  PTN  PTPN11  PTPN6  PTPRC  PTX3  PYY  QRFP  R3HDML  RABEP1  RABEP2  RAC1  RAC2  RAC3  RAET1E  RAET1G  RAET1L  RAF1  RARA  RARB  RARG  RASGRP1  RASGRP3  RBP1  RBP2  RBP4  RBP5  RBP7  REG1A  REG3G  RELA  RELB  RETN  RETNLB  RFX5  RFXANK  RFXAP  RHOA  RLN1  RLN2  RLN3  RN7SL1  RNASE2  RNASE3  RNASE7  RNASEL  ROBO1  ROBO2  ROBO3  RORA  RORB  RORC  RSAD2  RXFP1  RXFP2  RXFP3  RXRA  RXRB  RXRG  S100A1  S100A10  S100A11  S100A12  S100A13  S100A14  S100A16  S100A2  S100A3  S100A5  S100A6  S100A7  S100A7A  S100A7L2  S100A8  S100A9  S100B  S100G  S100P  S100Z  S1PR1  S1PR2  SAA1  SAA2  SBDS  SCG2  SCGB3A1  SCT  SCTR  SDC1  SDC2  SDC3  SDC4  SECTM1  SEM1  SEMA3A  SEMA3B  SEMA3C  SEMA3D  SEMA3E  SEMA3F  SEMA3G  SEMA4A  SEMA4B  SEMA4C  SEMA4D  SEMA4F  SEMA4G  SEMA5A  SEMA5B  SEMA6A  SEMA6B  SEMA6C  SEMA6D  SEMA7A  SEMG1  SEMG2  SEPTIN7  SERPINA3  SERPIND1  SFTPA1  SFTPA2  SFTPD  SH2D1A  SH2D1B  SH3BP2  SHC1  SHC2  SHC3  SHC4  SKIV2L  SLC10A2  SLC11A1  SLC22A17  SLC29A3  SLC40A1  SLIT1  SLIT2  SLPI  SLURP1  SOCS1  SOCS3  SOD1  SORT1  SOS1  SOS2  SP1  SPAG11A  SPAG11B  SPINK5  SPP1  SRC  SST  SSTR1  SSTR2  SSTR5  ST2  STAB2  STAT1  STAT3  STC1  STC2  STING1  SYK  SYTL1  TAC1  TACR1  TAFA1  TAFA2  TAFA3  TAFA4  TAFA5  TANK  TAP1  TAP2  TAPBP  TAPBPL  TBK1  TCF7L2  TCHHL1  TDGF1  TDGF1P3  TEC  TEK  TFR2  TFRC  TG  TGFA  TGFB1  TGFB2  TGFB3  TGFBR1  TGFBR2  TGFBR3  THBS1  THPO  THRA  THRB  TIE1  TINAGL1  TK2  TKFC  TLR1  TLR2  TLR3  TLR4  TLR7  TLR8  TMPRSS6  TMSB10  TMSB15A  TMSB15B  TMSB4X  TMSB4XP8  TMSB4Y  TNC  TNF  TNFAIP3  TNFRSF10A  TNFRSF10B  TNFRSF10C  TNFRSF10D  TNFRSF11A  TNFRSF11B  TNFRSF12A  TNFRSF13B  TNFRSF13C  TNFRSF14  TNFRSF17  TNFRSF18  TNFRSF19  TNFRSF1A  TNFRSF1B  TNFRSF21  TNFRSF25  TNFRSF4  TNFRSF6B  TNFRSF8  TNFRSF9  TNFSF10  TNFSF11  TNFSF12  TNFSF13  TNFSF13B  TNFSF14  TNFSF15  TNFSF18  TNFSF4  TNFSF8  TNFSF9  TOR2A  TPM2  TPT1  TRAC  TRAF3  TRAJ1  TRAJ10  TRAJ11  TRAJ12  TRAJ13  TRAJ14  TRAJ15  TRAJ16  TRAJ17  TRAJ18  TRAJ19  TRAJ2  TRAJ20  TRAJ21  TRAJ22  TRAJ23  TRAJ24  TRAJ25  TRAJ26  TRAJ27  TRAJ28  TRAJ29  TRAJ3  TRAJ30  TRAJ31  TRAJ32  TRAJ33  TRAJ34  TRAJ35  TRAJ36  TRAJ37  TRAJ38  TRAJ39  TRAJ4  TRAJ40  TRAJ41  TRAJ42  TRAJ43  TRAJ44  TRAJ45  TRAJ46  TRAJ47  TRAJ48  TRAJ49  TRAJ5  TRAJ50  TRAJ52  TRAJ53  TRAJ54  TRAJ56  TRAJ57  TRAJ58  TRAJ59  TRAJ6  TRAJ61  TRAJ7  TRAJ8  TRAJ9  TRAV10  TRAV1-1  TRAV1-2  TRAV12-1  TRAV12-2  TRAV12-3  TRAV13-1  TRAV13-2  TRAV14DV4  TRAV16  TRAV17  TRAV18  TRAV19  TRAV2  TRAV20  TRAV21  TRAV22  TRAV23DV6  TRAV24  TRAV25  TRAV26-1  TRAV26-2  TRAV27  TRAV29DV5  TRAV3  TRAV30  TRAV34  TRAV35  TRAV36DV7  TRAV38-1  TRAV38-2DV8  TRAV39  TRAV4  TRAV40  TRAV41  TRAV5  TRAV6  TRAV7  TRAV8-1  TRAV8-2  TRAV8-3  TRAV8-4  TRAV8-6  TRAV8-7  TRAV9-1  TRAV9-2  TRBC1  TRBC2  TRBD1  TRBD2  TRBJ1-1  TRBJ1-2  TRBJ1-3  TRBJ1-4  TRBJ1-5  TRBJ1-6  TRBJ2-1  TRBJ2-2  TRBJ2-3  TRBJ2-4  TRBJ2-5  TRBJ2-6  TRBJ2-7  TRBV10-1  TRBV10-2  TRBV10-3  TRBV11-1  TRBV11-2  TRBV11-3  TRBV12-3  TRBV12-4  TRBV12-5  TRBV13  TRBV14  TRBV15  TRBV16  TRBV17  TRBV18  TRBV19  TRBV2  TRBV20-1  TRBV24-1  TRBV25-1  TRBV27  TRBV28  TRBV29-1  TRBV30  TRBV3-1  TRBV4-1  TRBV4-2  TRBV4-3  TRBV5-1  TRBV5-4  TRBV5-5  TRBV5-6  TRBV5-7  TRBV5-8  TRBV6-1  TRBV6-2  TRBV6-3  TRBV6-4  TRBV6-5  TRBV6-6  TRBV6-7  TRBV6-8  TRBV6-9  TRBV7-2  TRBV7-3  TRBV7-4  TRBV7-6  TRBV7-7  TRBV7-8  TRBV7-9  TRBV9  TRDC  TRDD1  TRDD2  TRDD3  TRDJ1  TRDJ2  TRDJ3  TRDJ4  TRDV1  TRDV2  TRDV3  TRGC1  TRGC2  TRGJ1  TRGJ2  TRGJP  TRGJP1  TRGJP2  TRGV2  TRGV3  TRGV4  TRGV5  TRGV8  TRGV9  TRH  TRHR  TRIM22  TRIM27  TRIM5  TRPC4AP  TSHB  TSHR  TSLP  TUBB3  TXK  TXLNA  TYK2  TYMP  TYROBP  UBR1  UBXN1  UCN  UCN2  UCN3  ULBP1  ULBP2  ULBP3  UMODL1  UNC93B1  UTS2  UTS2B  VAV1  VAV2  VAV3  VCAM1  VDR  VEGFA  VEGFB  VEGFC  VEGFD  VGF  VIM  VIP  VIPR1  VIPR2  VTN  WFDC2  WFIKKN1  WNT5A  XCL1  XCL2  XCR1  ZAP70  ZC3HAV1  ZC3HAV1L  ZYX | AAMP  ABCA1  ABCG1  ABI1  ABL1  AC005013  ACAA1  ACAP1  ACE2  ACHE  ACTB  ACTG1  ACTR2  ACTR3  ADAD1  ADAM10  ADAM33  ADAR  ADARB1  ADCY1  ADCY2  ADCY3  ADCY4  ADCY5  ADCY6  ADCY7  ADCY8  ADCY9  ADIPOQ  ADRB2  ADRBK1  AGER  AGFG1  AGR2  AHR  AHSG  AICDA  AIM2  AIMP1  AIP  AIRE  AKAP10  AKIRIN2  AKNA  AKT1  AKT1S1  AMFR  ANGPT1  ANKRD17  ANO6  ANXA1  ANXA2  ANXA4  AP3B1  APCS  APOA1  APOBEC3A  APOBEC3B  APOBEC3C  APOBEC3D  APOBEC3F  APOBEC3G  APOBEC3H  APOH  APOL1  APP  AQP3  ARF6  ARG1  ARHGAP15  ARHGEF2  ARPC1A  ARPC2  ARPC3  ARPC4  ARPC5  ARRB2  ART1  ASCC3  ATF1  ATF2  ATF3  ATF4  ATG12  ATG16L1  ATG5  ATG9A  ATRIP  AVP  AXL  AZI2  B2M  BAD  BAIAP2  BCAR1  BCL10  BCL2  BCL2A1  BCL2L1  BCL3  BDKRB2  BECN1  BGN  BID  BIRC2  BIRC3  BIRC5  BMX  BPI  BPIFA1  BPIFB3  BRK1  BRS3  BST2  BTC  BTK  BTN3A1  BTN3A2  BTN3A3  C1QA  C1QB  C1QBP  C1QC  C1QTNF3  C1R  C1RL  C1S  C2  C3  C4A  C4B  C4BPA  C4BPB  C5  C5AR1  C6  C6orf57  C7  C8A  C8B  C8G  C9  CACTIN  CALCA  CALCOCO2  CALM1  CALM2  CALM3  CAMK2A  CAMK4  CAMKK2  CAMP  CAPRIN1  CAPZA1  CAPZA2  CARD11  CARD16  CARD6  CARD9  CASP1  CASP10  CASP12  CASP4  CASP6  CASP7  CASP8  CASP9  CAV1  CBL  CCBP2  CCDC88A  CCL1  CCL17  CCL2  CCL5  CCNA2  CCNT1  CCR2  CCR3  CCR4  CCR6  CCR7  CD14  CD180  CD19  CD1D  CD200  CD209  CD22  CD247  CD27  CD274  CD28  CD300A  CD300E  CD300LB  CD300LF  CD36  CD37  CD3G  CD4  CD40  CD46  CD53  CD55  CD59  CD5L  CD63  CD80  CD86  CD8A  CD97  CDC42  CDK1  CDK6  CDK9  CDKN1A  CDKN1B  CDKN2A  CEACAM1  CEACAM8  CEBPA  CEBPB  CEBPD  CEBPE  CFB  CFD  CFH  CFI  CFL1  CFLAR  CFP  CFTR  CHGA  CHID1  CHUK  CISH  CLEC10A  CLEC1B  CLEC4A  CLEC4C  CLEC4D  CLEC4E  CLEC4M  CLEC5A  CLEC6A  CLEC7A  CLEC9A  CLTC  CLU  CMA1  CNOT4  CNOT8  CNPY3  COLEC12  COPS5  COPS8  CORO1A  CORO2A  COX5B  CR1  CR2  CRCP  CREB1  CREBBP  CRISP3  CRK  CRKL  CRP  CSF1  CSF1R  CSF2RB  CSK  CTCF  CTLA4  CTNNAL1  CTNNB1  CTSB  CTSD  CTSG  CTSH  CTSK  CTSL1  CTSS  CXCL10  CXCL11  CXCL12  CXCL14  CXCL2  CXCL9  CXCR1  CXCR2  CXCR3  CXCR4  CYBA  CYBB  CYFIP2  CYLD  CYTIP  DAB2IP  DAK  DCD  DCN  DDIT3  DDOST  DDX1  DDX21  DDX3X  DDX41  DDX58  DDX60  DEFA1  DEFA1B  DEFA3  DEFA4  DEFA5  DEFA6  DEFB1  DEFB103A  DEFB103B  DEFB118  DEFB127  DEFB4A  DEFB4B  DEFT1P2  DHCR24  DHX33  DHX36  DHX58  DHX9  DICER1  DLK1  DMBT1  DNM1L  DOCK1  DOK3  DR1  DTX4  DUOX1  DUOX2  DUSP1  DUSP10  DUSP16  DUSP3  DUSP4  DUSP6  DUSP7  E2F1  E2F6  ECSIT  EDIL3  EDN1  EFTUD2  EGF  EGFR  EGLN2  EGR1  EHMT2  EIF2AK2  EIF2C1  EIF2C2  EIF2C3  EIF2C4  EIF4E  ELANE  ELAVL1  ELF1  ELF4  ELK1  ELMO1  ELMO2  ELMOD2  ELP2  EP300  EPOR  EPS8  ERAP1  ERBB2  ERBB2IP  ERBB3  ERBB4  EREG  ERN1  ETS1  F11  F12  F2R  F2RL1  F2RL2  F2RL3  FADD  FAM105B  FANCC  FBXO9  FBXW5  FCER1A  FCER1G  FCGR1A  FCGR2A  FCGR3A  FCN1  FCN2  FCN3  FFAR2  FGF1  FGF10  FGF16  FGF17  FGF18  FGF19  FGF2  FGF20  FGF22  FGF23  FGF3  FGF4  FGF5  FGF6  FGF7  FGF8  FGF9  FGFR1  FGFR2  FGFR3  FGFR4  FGR  FLI1  FLT4  FOS  FOXA1  FOXA2  FOXO1  FOXO3  FOXO4  FPR1  FPR2  FREM1  FRS2  FSTL1  FXR1  FYN  FZD1  G3BP1  GAB1  GAB2  GAS6  GATA3  GATA4  GATA6  GBP2  GJA1  GLI1  GLRX  GNAI2  GNAI3  GNB2  GNB2L1  GOPC  GP2  GPER  GPR33  GPR77  GPSM1  GRAP2  GRB2  GRK5  GRN  GSDMA  GSDMB  GSK3A  GSK3B  GSTM1  GSTP1  GZMM  HACE1  HAMP  HAVCR2  HBEGF  HCK  HDAC1  HDAC11  HDAC2  HERC5  HIF1A  HIF1AN  HLA-B  HLA-C  HLA-DQB1  HMGB1  HMGB2  HMGB3  HMGN2  HMOX1  HNRNPL  HOXA9  HRAS  HRG  HRH4  HSF1  HSP90AA1  HSP90AB1  HSP90B1  HSPA14  HSPA1A  HSPBP1  HSPD1  ICAM1  IDO1  IFI16  IFI27  IFI6  IFIH1  IFIT1  IFIT2  IFIT3  IFIT5  IFITM1  IFITM2  IFITM3  IFNA1  IFNA10  IFNA13  IFNA14  IFNA16  IFNA17  IFNA2  IFNA21  IFNA4  IFNA5  IFNA6  IFNA7  IFNA8  IFNAR1  IFNAR2  IFNB1  IFNE  IFNG  IFNGR1  IFNGR2  IFNK  IFNW1  IFRD1  IGF1  IGF1R  IGHE  IGHG1  IGHG2  IGHG3  IGHG4  IGJ  IGKC  IGKV1-8  IGKV3-11  IGKV3-20  IGKV4-1  IGKV5-2  IGLL5  IKBKB  IKBKE  IKBKG  IL10  IL12A  IL12B  IL13  IL13RA1  IL15  IL17A  IL17C  IL17F  IL17RE  IL18  IL18R1  IL19  IL1A  IL1B  IL1R1  IL1R2  IL1RAP  IL1RAPL1  IL1RL1  IL1RL2  IL2  IL21  IL22  IL22RA2  IL23A  IL25  IL27  IL28A  IL28B  IL29  IL2RB  IL2RG  IL31  IL32  IL33  IL34  IL37  IL3RA  IL4  IL4R  IL6  IL6ST  IL8  IL9  IL9R  ILF3  IMPDH2  ING4  INPP5D  INSIG1  IP6K1  IPO7  IRAK1  IRAK1BP1  IRAK2  IRAK3  IRAK4  IRF1  IRF2  IRF2BP1  IRF3  IRF4  IRF5  IRF6  IRF7  IRF8  IRF9  IRGM  IRS1  IRS2  ISG15  ISG20  ITCH  ITGA3  ITGAM  ITGAV  ITGAX  ITGB1  ITGB2  ITGB3  ITGB5  ITK  ITPR1  ITPR2  ITPR3  JAK1  JAK2  JAK3  JAM3  JUN  KAT2B  KCNIP4  KCNJ8  KDM1A  KHSRP  KIAA0226  KIR3DL2  KIT  KITLG  KL  KLB  KLK1  KLRC2  KLRD1  KLRG1  KLRK1  KPNA1  KRAS  LAIR1  LAT  LAT2  LBP  LCK  LCN2  LCP2  LEP  LGALS1  LGALS2  LGALS3  LGALS4  LGALS8  LGALS9  LGMN  LGR4  LILRA2  LILRA4  LILRA5  LILRB3  LIMK1  LPCAT2  LPP  LRRC33  LRRFIP1  LRRFIP2  LRRK2  LST1  LTB4R  LTBR  LY86  LY9  LY96  LYN  LZTS1  MAFB  MALT1  MAP1LC3C  MAP2K1  MAP2K2  MAP2K3  MAP2K4  MAP2K6  MAP2K7  MAP3K1  MAP3K12  MAP3K14  MAP3K3  MAP3K4  MAP3K5  MAP3K7  MAP3K8  MAP4K2  MAPK1  MAPK10  MAPK11  MAPK14  MAPK3  MAPK7  MAPK8  MAPK9  MAPKAP1  MAPKAPK2  MAPKAPK3  MARCO  MASP1  MASP2  MAVS  MB21D1  MBL2  MDM2  MEF2A  MEF2C  MEFV  MERTK  MFF  MFN1  MFN2  MICA  MID1  MID2  MIF  MIR107  MIR10B  MIR122  MIR125B1  MIR125B2  MIR126  MIR1275  MIR130A  MIR141  MIR146A  MIR146B  MIR148A  MIR148B  MIR152  MIR155  MIR15B  MIR16-1  MIR16-2  MIR181A2  MIR187  MIR200C  MIR203  MIR208B  MIR21  MIR223  MIR23A  MIR23B  MIR29A  MIR3148  MIR328  MIR362  MIR372  MIR373  MIR378A  MIR485  MIR499A  MIR517A  MIR517C  MIR548G  MIRLET7B  MIRLET7C  MIRLET7E  MKNK1  MLST8  MMP7  MMP8  MMP9  MOV10  MR1  MRE11A  MRGPRX2  MS4A2  MS4A8B  MSR1  MST1R  MTA1  MTOR  MUC1  MUL1  MX1  MX2  MYC  MYD88  MYH2  MYH9  MYO10  MYO1C  NAIP  NAMPT  NCF1  NCF2  NCK1  NCKAP1  NCKAP1L  NCKIPSD  NCR2  NDUFA13  NEU1  NFAT5  NFATC1  NFATC2  NFATC3  NFATC4  NFE2L2  NFIL3  NFKB1  NFKB2  NFKBIA  NFKBIB  NFKBIE  NFKBIZ  NKIRAS1  NKIRAS2  NLRC3  NLRC4  NLRC5  NLRP1  NLRP10  NLRP11  NLRP12  NLRP13  NLRP14  NLRP2  NLRP3  NLRP4  NLRP5  NLRP6  NLRP7  NLRP8  NLRP9  NLRX1  NOD1  NOD2  NOS2  NOTCH1  NOX1  NOX4  NOXA1  NR1H3  NR1H4  NR3C1  NR4A1  NR4A3  NRAS  NRG1  NRG2  NRG4  NRIP1  NTN1  NUMBL  NUP153  NUP214  NXN  OAS1  OAS2  OAS3  OLFM4  OPTN  ORMDL3  OTUB1  OTUB2  OTUD5  P2RX7  P2RY14  PACSIN1  PADI4  PAK1  PAK2  PALM3  PANX1  PARD3  PARK2  PCBP1  PCBP2  PDCD1  PDCD1LG2  PDE12  PDE1A  PDE1B  PDE1C  PDGFA  PDGFB  PDGFRA  PDGFRB  PDPK1  PELI1  PELI2  PELI3  PGLYRP1  PGLYRP2  PGLYRP3  PGLYRP4  PHLPP1  PHLPP2  PIAS1  PIAS2  PIAS3  PIAS4  PIK3AP1  PIK3C3  PIK3CA  PIK3CB  PIK3CD  PIK3CG  PIK3R1  PIK3R2  PIK3R4  PIN1  PKLR  PKN1  PLA2G2A  PLA2G4A  PLA2G6  PLAUR  PLCG1  PLCG2  PLCL1  PLD2  PLEC  PLG  PLK1  PLSCR1  PLTP  PLXNA4  PMAIP1  PML  POLR1C  POLR1D  POLR2E  POLR2F  POLR2H  POLR2K  POLR2L  POLR3A  POLR3B  POLR3C  POLR3D  POLR3E  POLR3F  POLR3G  POLR3GL  POLR3H  POLR3K  POSTN  PPAPDC1A  PPARG  PPARGC1A  PPARGC1B  PPIA  PPP1CA  PPP1CC  PPP2R5D  PPP3CA  PPP3CB  PPP3R1  PPP4C  PQBP1  PRKACA  PRKACB  PRKACG  PRKAR1A  PRKAR1B  PRKAR2A  PRKAR2B  PRKCA  PRKCD  PRKCE  PRKCG  PRKCQ  PRKCSH  PRKD1  PRKDC  PRKRA  PRKX  PRMT1  PROCR  PROS1  PRSS3  PRSS3P2  PRTN3  PSMA7  PSTPIP1  PTAFR  PTCH1  PTEN  PTGER4  PTGES  PTGES2  PTGS2  PTK2  PTK2B  PTMA  PTPN11  PTPN2  PTPN6  PTPRC  PTX3  PURA  PYCARD  PYDC1  RAB11A  RAC1  RAC2  RAD21  RAD23A  RAF1  RAG1  RANBP9  RARRES2  RASGEF1B  RASGRP1  RB1  RBCK1  RCAN1  RCOR1  REL  RELA  RELB  REST  RETNLB  RFTN1  RGMB  RGS2  RHBDF2  RICTOR  RIPK1  RIPK2  RIPK3  RNASE3  RNASE7  RNASEL  RNF125  RNF135  RNF31  RNF41  RNF5  RORA  RPL19  RPS19  RPS27A  RPS6KA1  RPS6KA2  RPS6KA3  RPS6KA4  RPS6KA5  RPS6KB2  RSAD2  RUNX3  RUSC1  RXRA  S100A10  S100A12  S100A7  S100A8  S100A9  S100B  SAA1  SAMHD1  SARM1  SCAF11  SCAMP5  SCARB1  SCARF1  SCGB3A2  SCN5A  SDC4  SEBOX  SELE  SELK  SEMA3A  SENP2  SEPX1  SERPINB9  SERPINE1  SERPING1  SFTPA1  SFTPA2  SFTPD  SH2D1A  SHARPIN  SHC1  SIAH1  SIAH2  SIGIRR  SIGLEC1  SIGLEC10  SIGLEC11  SIGLEC14  SIGLEC15  SIGLEC5  SIGLEC6  SIGLEC7  SIGLEC8  SIGLEC9  SIKE1  SIRPA  SIRPB1  SIRT1  SIRT2  SIVA1  SKP2  SLAMF1  SLAMF6  SLAMF7  SLAMF8  SLAMF9  SLC15A4  SLC22A3  SLC25A46  SLC2A11  SLX4  SMAD3  SMAD4  SMAD6  SMAD7  SMAP2  SMARCA2  SMARCA4  SMARCE1  SNAP23  SNCA  SNX27  SOCS1  SOCS2  SOCS3  SOCS5  SOCS6  SOS1  SPHK1  SPI1  SPINK5  SPON2  SPP1  SQSTM1  SRC  SREBF1  SREBF2  SRPK1  SRPK2  SSC5D  STAP2  STAT1  STAT2  STAT3  STAT4  STAT5A  STAT5B  STAT6  STIM1  STUB1  SUGT1  SWAP70  SYK  SYP  TAB1  TAB2  TAB3  TANK  TAX1BP1  TBC1D27  TBK1  TBKBP1  TCEB1  TCEB2  TCF4  TEC  TECPR1  TGFB1  THBS1  THEM4  THRB  TICAM1  TICAM2  TIFA  TIRAP  TLR1  TLR10  TLR2  TLR3  TLR4  TLR5  TLR6  TLR7  TLR8  TLR9  TMED7  TMEM173  TNF  TNFAIP3  TNFAIP8L2  TNFRSF12A  TNFRSF18  TNFRSF1A  TNFRSF1B  TNFRSF9  TNFSF10  TNFSF11  TNFSF9  TNIP1  TNIP3  TNK1  TNRC6A  TNRC6B  TNRC6C  TOLLIP  TOMM70A  TP53  TP63  TP73  TPP2  TPSB2  TPST1  TPT1  TRADD  TRAF1  TRAF2  TRAF3  TRAF5  TRAF6  TRAFD1  TRAIP  TRAT1  TREM1  TREM2  TREML1  TREML2  TREX1  TRIB2  TRIB3  TRIM10  TRIM11  TRIM13  TRIM14  TRIM15  TRIM21  TRIM22  TRIM23  TRIM24  TRIM25  TRIM26  TRIM27  TRIM28  TRIM31  TRIM32  TRIM35  TRIM36  TRIM37  TRIM38  TRIM42  TRIM45  TRIM47  TRIM49  TRIM5  TRIM50  TRIM55  TRIM56  TRIM58  TRIM6  TRIM60  TRIM61  TRIM62  TRIM63  TRIM65  TRIM66  TRIM67  TRIM7  TRIM71  TRIM8  TRIM9  TRPM2  TRPV2  TSC1  TSC2  TSC22D3  TTC6  TUFM  TXN  TXNIP  TYK2  TYRO3  TYROBP  UBA52  UBA7  UBB  UBC  UBD  UBE2D1  UBE2D2  UBE2D3  UBE2L6  UBE2N  UBE2V1  UBE2V2  UBE2W  UBQLN1  UCHL1  UCP2  ULK1  UNC5CL  UNC93B1  USP17L11  USP2  USP4  USP7  VASP  VAV1  VAV2  VAV3  VDR  VEGFA  VEGFC  VENTX  VLDLR  VNN1  VPS45  WAS  WASF2  WASL  WDR34  WDR62  WFDC12  WIPF1  WIPF2  WIPF3  WNT2B  WNT3A  WNT9B  XBP1  XDH  XIAP  XRCC5  XRCC6  YES1  YWHAB  YWHAE  YY1  ZBP1  ZBTB1  ZBTB16  ZC3H12A  ZC3HAV1  ZFPM1  ZFPM2  ZMYND11 | A2M  AAMP  ABCA1  ABCC4  ABCG1  ABI1  ABL1  AC005013  ACAA1  ACAP1  ACE2  ACHE  ACKR1  ACKR2  ACKR3  ACKR4  ACO1  ACTA1  ACTB  ACTG1  ACTR2  ACTR3  ACVR1B  ACVR1C  ACVR2A  ACVR2B  ACVRL1  ADA2  ADAD1  ADAM10  ADAM33  ADAR  ADARB1  ADCY1  ADCY2  ADCY3  ADCY4  ADCY5  ADCY6  ADCY7  ADCY8  ADCY9  ADCYAP1R1  ADIPOQ  ADIPOR1  ADIPOR2  ADM  ADM2  ADRB1  ADRB2  ADRBK1  ADRM1  AEN  AGER  AGFG1  AGR2  AGRP  AGT  AGTR1  AGTR2  AHNAK  AHR  AHSG  AICDA  AIM2  AIMP1  AIP  AIRE  AKAP10  AKIRIN2  AKNA  AKT1  AKT1S1  AKT2  AKT3  ALB  AMBN  AMELX  AMFR  AMH  AMHR2  ANGPT1  ANGPT4  ANGPTL1  ANGPTL2  ANGPTL3  ANGPTL4  ANGPTL5  ANGPTL6  ANGPTL7  ANKRD17  ANO6  ANOS1  ANXA1  ANXA2  ANXA4  ANXA6  AP3B1  APCS  APLN  APLNR  APOA1  APOBEC3A  APOBEC3B  APOBEC3C  APOBEC3D  APOBEC3F  APOBEC3G  APOBEC3H  APOD  APOH  APOL1  APOM  APP  AQP3  AQP9  AR  ARAF  AREG  ARF6  ARG1  ARG2  ARHGAP15  ARHGEF2  ARPC1A  ARPC2  ARPC3  ARPC4  ARPC5  ARRB1  ARRB2  ART1  ARTN  ASCC3  ATF1  ATF2  ATF3  ATF4  ATG12  ATG16L1  ATG5  ATG9A  ATRIP  AVP  AVPR1A  AVPR1B  AVPR2  AXL  AZGP1  AZI2  AZU1  B2M  BACH2  BAD  BAIAP2  BCAR1  BCL10  BCL2  BCL2A1  BCL2L1  BCL3  BDKRB2  BDNF  BECN1  BGN  BID  BIRC2  BIRC3  BIRC5  BLNK  BMP1  BMP10  BMP15  BMP2  BMP3  BMP4  BMP5  BMP6  BMP7  BMP8A  BMP8B  BMPR1A  BMPR1B  BMPR2  BMX  BPHL  BPI  BPIFA1  BPIFA2  BPIFA3  BPIFB1  BPIFB2  BPIFB3  BPIFB4  BPIFB6  BPIFC  BRAF  BRD8  BRK1  BRS3  BST2  BTC  BTK  BTN3A1  BTN3A2  BTN3A3  C1QA  C1QB  C1QBP  C1QC  C1QTNF3  C1R  C1RL  C1S  C2  C3  C3AR1  C4A  C4B  C4BPA  C4BPB  C5  C5AR1  C5AR2  C6  C6orf57  C7  C8A  C8B  C8G  C9  CACTIN  CACYBP  CALCA  CALCB  CALCOCO2  CALCR  CALCRL  CALM1  CALM2  CALM3  CALR  CAMK2A  CAMK4  CAMKK2  CAMP  CANX  CAPRIN1  CAPZA1  CAPZA2  CARD11  CARD16  CARD6  CARD9  CASP1  CASP10  CASP12  CASP3  CASP4  CASP6  CASP7  CASP8  CASP9  CAT  CAV1  CBL  CBLB  CBLC  CCBP2  CCDC88A  CCK  CCL1  CCL11  CCL13  CCL14  CCL15  CCL15-CCL14  CCL16  CCL17  CCL18  CCL19  CCL2  CCL20  CCL21  CCL22  CCL23  CCL24  CCL25  CCL26  CCL27  CCL28  CCL3  CCL3L1  CCL3L3  CCL3P1  CCL4  CCL4L1  CCL4L2  CCL5  CCL7  CCL8  CCN1  CCN2  CCN3  CCNA2  CCNT1  CCR1  CCR10  CCR2  CCR3  CCR4  CCR5  CCR6  CCR7  CCR8  CCR9  CCRL2  CD14  CD180  CD19  CD1A  CD1B  CD1C  CD1D  CD1E  CD200  CD209  CD22  CD244  CD247  CD27  CD274  CD28  CD300A  CD300E  CD300LB  CD300LF  CD320  CD36  CD37  CD3D  CD3E  CD3G  CD4  CD40  CD40LG  CD46  CD48  CD53  CD55  CD59  CD5L  CD63  CD70  CD72  CD74  CD79A  CD79B  CD80  CD81  CD86  CD8A  CD8B  CD97  CDC42  CDH1  CDK1  CDK4  CDK6  CDK9  CDKN1A  CDKN1B  CDKN2A  CDNF  CEACAM1  CEACAM8  CEBPA  CEBPB  CEBPD  CEBPE  CELA1  CER1  CETP  CFB  CFD  CFH  CFI  CFL1  CFLAR  CFP  CFTR  CGA  CGB1  CGB2  CGB3  CGB5  CGB7  CGB8  CHGA  CHGB  CHID1  CHIT1  CHP1  CHP2  CHUK  CIITA  CISH  CKLF  CLCF1  CLDN4  CLEC10A  CLEC11A  CLEC1B  CLEC4A  CLEC4C  CLEC4D  CLEC4E  CLEC4M  CLEC5A  CLEC6A  CLEC7A  CLEC9A  CLTC  CLU  CMA1  CMKLR1  CMTM1  CMTM2  CMTM3  CMTM4  CMTM5  CMTM6  CMTM7  CMTM8  CNOT4  CNOT8  CNPY3  CNTF  CNTFR  COLEC10  COLEC12  COPS5  COPS8  CORO1A  CORO2A  CORT  COX5B  CR1  CR2  CRABP1  CRABP2  CRCP  CREB1  CREBBP  CRH  CRHR1  CRHR2  CRIM1  CRISP3  CRK  CRKL  CRLF1  CRLF2  CRLF3  CRP  CSF1  CSF1R  CSF2  CSF2RA  CSF2RB  CSF3  CSF3R  CSH1  CSH2  CSHL1  CSK  CSPG5  CSRP1  CST4  CTCF  CTF1  CTLA4  CTNNAL1  CTNNB1  CTSB  CTSD  CTSE  CTSG  CTSH  CTSK  CTSL  CTSL1  CTSS  CX3CL1  CX3CR1  CXCL1  CXCL10  CXCL11  CXCL12  CXCL13  CXCL14  CXCL16  CXCL17  CXCL2  CXCL3  CXCL5  CXCL6  CXCL8  CXCL9  CXCR1  CXCR2  CXCR3  CXCR4  CXCR5  CXCR6  CYBA  CYBB  CYFIP2  CYLD  CYSLTR1  CYSLTR2  CYTIP  DAB2IP  DAK  DAXX  DCD  DCK  DCN  DDIT3  DDOST  DDX1  DDX17  DDX21  DDX3X  DDX41  DDX58  DDX60  DEFA1  DEFA1A3  DEFA1B  DEFA3  DEFA4  DEFA5  DEFA6  DEFA7P  DEFB1  DEFB103A  DEFB103B  DEFB104A  DEFB104B  DEFB105A  DEFB105B  DEFB106A  DEFB106B  DEFB107A  DEFB107B  DEFB108B  DEFB108F  DEFB110  DEFB112  DEFB113  DEFB114  DEFB115  DEFB116  DEFB117  DEFB118  DEFB119  DEFB121  DEFB123  DEFB124  DEFB125  DEFB126  DEFB127  DEFB128  DEFB129  DEFB130A  DEFB130B  DEFB131A  DEFB131B  DEFB131C  DEFB132  DEFB133  DEFB134  DEFB135  DEFB136  DEFB4A  DEFB4B  DEFT1P2  DES  DHCR24  DHX33  DHX36  DHX58  DHX9  DICER1  DKK1  DLK1  DLL4  DMBT1  DNM1L  DOCK1  DOK3  DR1  DTX4  DUOX1  DUOX2  DUSP1  DUSP10  DUSP16  DUSP3  DUSP4  DUSP6  DUSP7  E2F1  E2F6  EBI3  ECD  ECPAS  ECSIT  EDIL3  EDN1  EDN2  EDN3  EDNRA  EDNRB  EED  EFTUD2  EGF  EGFR  EGLN2  EGR1  EHMT2  EIF2AK2  EIF2C1  EIF2C2  EIF2C3  EIF2C4  EIF4E  ELANE  ELAVL1  ELF1  ELF4  ELK1  ELMO1  ELMO2  ELMOD2  ELN  ELP2  ENDOU  ENG  EP300  EPGN  EPO  EPOR  EPPIN  EPS8  ERAP1  ERAP2  ERBB2  ERBB2IP  ERBB3  ERBB4  EREG  ERN1  ESM1  ESR1  ESR2  ESRRA  ESRRB  ESRRG  ETS1  F11  F12  F2R  F2RL1  F2RL2  F2RL3  FABP12  FABP2  FABP3  FABP4  FABP5  FABP6  FABP7  FABP9  FADD  FAM105B  FAM3B  FAM3C  FAM3D  FANCC  FAS  FASLG  FBXO9  FBXW5  FCER1A  FCER1G  FCGR1A  FCGR2A  FCGR2B  FCGR3A  FCGR3B  FCGRT  FCN1  FCN2  FCN3  FFAR2  FGA  FGF1  FGF10  FGF11  FGF12  FGF13  FGF14  FGF16  FGF17  FGF18  FGF19  FGF2  FGF20  FGF21  FGF22  FGF23  FGF3  FGF4  FGF5  FGF6  FGF7  FGF7P3  FGF7P6  FGF8  FGF9  FGFR1  FGFR2  FGFR3  FGFR4  FGFRL1  FGR  FIGNL2  FLI1  FLT1  FLT3  FLT3LG  FLT4  FOS  FOXA1  FOXA2  FOXO1  FOXO3  FOXO4  FPR1  FPR2  FREM1  FRS2  FSHB  FSHR  FSTL1  FURIN  FXR1  FYN  FZD1  G3BP1  GAB1  GAB2  GAL  GALP  GALR2  GALR3  GAS6  GAST  GATA3  GATA4  GATA6  GBP2  GCG  GCGR  GDF1  GDF10  GDF11  GDF15  GDF2  GDF3  GDF5  GDF6  GDF7  GDF9  GDNF  GFAP  GH1  GH2  GHR  GHRH  GHRHR  GHRL  GHSR  GIP  GIPR  GJA1  GKN1  GLI1  GLP1R  GLP2R  GLRX  GMFB  GMFG  GNAI1  GNAI2  GNAI3  GNB2  GNB2L1  GNLY  GNRH1  GNRH2  GNRHR  GOPC  GP2  GPER  GPER1  GPHA2  GPHB5  GPI  GPR17  GPR32  GPR33  GPR77  GPSM1  GRAP2  GRB2  GREM1  GREM2  GRK2  GRK5  GRN  GRP  GSDMA  GSDMB  GSK3A  GSK3B  GSTM1  GSTP1  GUCA2A  GZMB  GZMM  HACE1  HAMP  HAVCR2  HBEGF  HCK  HCST  HDAC1  HDAC11  HDAC2  HDGF  HDGFL3  HERC5  HFE  HGF  HIF1A  HIF1AN  HJV  HLA-A  HLA-B  HLA-C  HLA-DMA  HLA-DMB  HLA-DOA  HLA-DOB  HLA-DPA1  HLA-DPB1  HLA-DQA1  HLA-DQA2  HLA-DQB1  HLA-DRA  HLA-DRB1  HLA-DRB3  HLA-DRB4  HLA-DRB5  HLA-E  HLA-F  HLA-G  HLA-H  HMGB1  HMGB2  HMGB3  HMGN2  HMOX1  HNF4A  HNF4G  HNRNPL  HOXA9  HRAS  HRG  HRH4  HSF1  HSP90AA1  HSP90AB1  HSP90B1  HSPA14  HSPA1A  HSPA1B  HSPA1L  HSPA2  HSPA4  HSPA5  HSPA6  HSPA8  HSPBP1  HSPD1  HTN1  HTN3  HTR1A  HTR3A  HTR3B  HTR3C  HTR3D  HTR3E  IAPP  ICAM1  ICAM2  ICOS  IDO1  IFI16  IFI27  IFI30  IFI6  IFIH1  IFIT1  IFIT2  IFIT3  IFIT5  IFITM1  IFITM2  IFITM3  IFN1@  IFNA1  IFNA10  IFNA13  IFNA14  IFNA16  IFNA17  IFNA2  IFNA21  IFNA4  IFNA5  IFNA6  IFNA7  IFNA8  IFNAR1  IFNAR2  IFNB1  IFNE  IFNG  IFNGR1  IFNGR2  IFNK  IFNL1  IFNL2  IFNL3  IFNLR1  IFNW1  IFRD1  IGF1  IGF1R  IGF2  IGF2R  IGH  IGHA1  IGHA2  IGHD  IGHD1-1  IGHD1-14  IGHD1-20  IGHD1-26  IGHD1-7  IGHD2-15  IGHD2-2  IGHD2-21  IGHD2-8  IGHD3-10  IGHD3-16  IGHD3-22  IGHD3-3  IGHD3-9  IGHD4-11  IGHD4-17  IGHD4-23  IGHD4-4  IGHD5-12  IGHD5-18  IGHD5-24  IGHD5-5  IGHD6-13  IGHD6-19  IGHD6-25  IGHD6-6  IGHD7-27  IGHE  IGHG1  IGHG2  IGHG3  IGHG4  IGHJ1  IGHJ2  IGHJ3  IGHJ4  IGHJ5  IGHJ6  IGHM  IGHV1-18  IGHV1-2  IGHV1-24  IGHV1-3  IGHV1-38-4  IGHV1-45  IGHV1-46  IGHV1-58  IGHV1-69  IGHV1-69-2  IGHV1-8  IGHV2-26  IGHV2-5  IGHV2-70  IGHV3-11  IGHV3-13  IGHV3-15  IGHV3-16  IGHV3-20  IGHV3-21  IGHV3-23  IGHV3-30  IGHV3-30-3  IGHV3-30-5  IGHV3-33  IGHV3-35  IGHV3-38  IGHV3-38-3  IGHV3-43  IGHV3-48  IGHV3-49  IGHV3-53  IGHV3-64  IGHV3-66  IGHV3-69-1  IGHV3-7  IGHV3-72  IGHV3-73  IGHV3-74  IGHV3-9  IGHV4-28  IGHV4-30-1  IGHV4-30-2  IGHV4-30-4  IGHV4-31  IGHV4-34  IGHV4-38-2  IGHV4-39  IGHV4-4  IGHV4-59  IGHV4-61  IGHV5-10-1  IGHV5-51  IGHV6-1  IGHV7-4-1  IGHV7-81  IGJ  IGK  IGKC  IGKDEL  IGKJ  IGKJ1  IGKJ2  IGKJ3  IGKJ4  IGKJ5  IGKV@  IGKV1-12  IGKV1-13  IGKV1-16  IGKV1-17  IGKV1-27  IGKV1-33  IGKV1-37  IGKV1-39  IGKV1-5  IGKV1-6  IGKV1-8  IGKV1-9  IGKV1D-12  IGKV1D-13  IGKV1D-16  IGKV1D-17  IGKV1D-33  IGKV1D-37  IGKV1D-39  IGKV1D-42  IGKV1D-43  IGKV1D-8  IGKV2-24  IGKV2-28  IGKV2-30  IGKV2-40  IGKV2D-24  IGKV2D-28  IGKV2D-29  IGKV2D-30  IGKV2D-40  IGKV3-11  IGKV3-15  IGKV3-20  IGKV3-7  IGKV3D-11  IGKV3D-15  IGKV3D-20  IGKV3D-7  IGKV4-1  IGKV5-2  IGKV6-21  IGKV6D-21  IGKV6D-41  IGL  IGLC1  IGLC2  IGLC3  IGLC6  IGLC7  IGLJ  IGLJ1  IGLJ2  IGLJ3  IGLJ4  IGLJ5  IGLJ6  IGLJ7  IGLL5  IGLV@  IGLV10-54  IGLV11-55  IGLV1-36  IGLV1-40  IGLV1-44  IGLV1-47  IGLV1-50  IGLV1-51  IGLV2-11  IGLV2-14  IGLV2-18  IGLV2-23  IGLV2-33  IGLV2-8  IGLV3-1  IGLV3-10  IGLV3-12  IGLV3-16  IGLV3-19  IGLV3-21  IGLV3-22  IGLV3-25  IGLV3-27  IGLV3-32  IGLV3-9  IGLV4-3  IGLV4-60  IGLV4-69  IGLV5-37  IGLV5-39  IGLV5-45  IGLV5-48  IGLV5-52  IGLV6-57  IGLV7-43  IGLV7-46  IGLV8-61  IGLV9-49  IKBKB  IKBKE  IKBKG  IL10  IL10RA  IL10RB  IL11  IL11RA  IL12A  IL12B  IL12RB1  IL12RB2  IL13  IL13RA1  IL13RA2  IL15  IL15RA  IL16  IL17A  IL17B  IL17C  IL17D  IL17F  IL17RA  IL17RB  IL17RC  IL17RD  IL17RE  IL18  IL18R1  IL18RAP  IL19  IL1A  IL1B  IL1F10  IL1R1  IL1R2  IL1RAP  IL1RAPL1  IL1RL1  IL1RL2  IL1RN  IL2  IL20  IL20RA  IL20RB  IL21  IL21R  IL22  IL22RA1  IL22RA2  IL23A  IL23R  IL24  IL25  IL26  IL27  IL27RA  IL28A  IL28B  IL29  IL2RA  IL2RB  IL2RG  IL3  IL31  IL31RA  IL32  IL33  IL34  IL36A  IL36B  IL36G  IL36RN  IL37  IL3RA  IL4  IL4R  IL5  IL5RA  IL6  IL6R  IL6ST  IL7  IL7R  IL8  IL9  IL9R  ILF3  ILK  IMPDH2  ING4  INHA  INHBA  INHBB  INHBC  INHBE  INPP5D  INS  INSIG1  INS-IGF2  INSL3  INSL4  INSL5  INSL6  INSR  IP6K1  IPO7  IRAK1  IRAK1BP1  IRAK2  IRAK3  IRAK4  IREB2  IRF1  IRF2  IRF2BP1  IRF3  IRF4  IRF5  IRF6  IRF7  IRF8  IRF9  IRGM  IRS1  IRS2  ISG15  ISG20  ISG20L2  ITCH  ITGA3  ITGAL  ITGAM  ITGAV  ITGAX  ITGB1  ITGB2  ITGB3  ITGB5  ITK  ITPR1  ITPR2  ITPR3  JAG1  JAG2  JAK1  JAK2  JAK3  JAM3  JUN  JUND  KAT2B  KCNH2  KCNIP4  KCNJ8  KDM1A  KDR  KHSRP  KIAA0226  KIR2DL1  KIR2DL2  KIR2DL3  KIR2DL4  KIR2DL5A  KIR2DS1  KIR2DS3  KIR2DS4  KIR2DS5  KIR3DL1  KIR3DL2  KIR3DL3  KIT  KITLG  KL  KLB  KLK1  KLKB1  KLRC1  KLRC2  KLRC3  KLRC4  KLRD1  KLRG1  KLRK1  KNG1  KPNA1  KRAS  LACRT  LAIR1  LALBA  LANCL1  LAT  LAT2  LBP  LCK  LCN1  LCN10  LCN12  LCN15  LCN1P1  LCN2  LCN6  LCN8  LCN9  LCNL1  LCP2  LEAP2  LECT2  LEFTY1  LEFTY2  LEP  LEPR  LGALS1  LGALS2  LGALS3  LGALS4  LGALS8  LGALS9  LGMN  LGR4  LGR5  LGR6  LHB  LHCGR  LIF  LIFR  LILRA2  LILRA4  LILRA5  LILRB3  LIMK1  LIMS1  LMBR1  LMBR1L  LPA  LPCAT2  LPP  LRP1  LRRC33  LRRFIP1  LRRFIP2  LRRK2  LRSAM1  LST1  LTA  LTB  LTB4R  LTB4R2  LTBP1  LTBP2  LTBP3  LTBP4  LTBR  LTF  LY86  LY9  LY96  LYN  LYZ  LZTS1  MAFB  MALT1  MANF  MAP1LC3C  MAP2K1  MAP2K2  MAP2K3  MAP2K4  MAP2K6  MAP2K7  MAP3K1  MAP3K12  MAP3K14  MAP3K3  MAP3K4  MAP3K5  MAP3K7  MAP3K8  MAP4K2  MAPK1  MAPK10  MAPK11  MAPK14  MAPK3  MAPK7  MAPK8  MAPK9  MAPKAP1  MAPKAPK2  MAPKAPK3  MAPT  MARCO  MASP1  MASP2  MAVS  MB21D1  MBL2  MBL3P  MC1R  MC2R  MC3R  MC4R  MCHR1  MCHR2  MDK  MDM2  MEF2A  MEF2C  MEFV  MERTK  MET  MFF  MFN1  MFN2  MIA  MICA  MICB  MID1  MID2  MIF  MIR107  MIR10B  MIR122  MIR125B1  MIR125B2  MIR126  MIR1275  MIR130A  MIR141  MIR146A  MIR146B  MIR148A  MIR148B  MIR152  MIR155  MIR15B  MIR16-1  MIR16-2  MIR181A2  MIR187  MIR200C  MIR203  MIR208B  MIR21  MIR223  MIR23A  MIR23B  MIR29A  MIR3148  MIR328  MIR362  MIR372  MIR373  MIR378A  MIR485  MIR499A  MIR517A  MIR517C  MIR548G  MIRLET7B  MIRLET7C  MIRLET7E  MKNK1  MLN  MLNR  MLST8  MMP12  MMP7  MMP8  MMP9  MOV10  MPL  MPO  MR1  MRE11A  MRGPRX2  MS4A2  MS4A8B  MSR1  MST1R  MSTN  MTA1  MTNR1A  MTNR1B  MTOR  MUC1  MUC4  MUC5AC  MUL1  MX1  MX2  MYC  MYD88  MYDGF  MYH2  MYH9  MYO10  MYO1C  NAIP  NAMPT  NCF1  NCF2  NCK1  NCK2  NCKAP1  NCKAP1L  NCKIPSD  NCR1  NCR2  NCR3  NDP  NDRG1  NDUFA13  NEDD4  NENF  NEO1  NEU1  NEWENTRY  NFAT5  NFATC1  NFATC2  NFATC3  NFATC4  NFE2L2  NFIL3  NFKB1  NFKB2  NFKBIA  NFKBIB  NFKBIE  NFKBIZ  NFYA  NFYB  NFYC  NGF  NGFR  NKIRAS1  NKIRAS2  NLRC3  NLRC4  NLRC5  NLRP1  NLRP10  NLRP11  NLRP12  NLRP13  NLRP14  NLRP2  NLRP3  NLRP4  NLRP5  NLRP6  NLRP7  NLRP8  NLRP9  NLRX1  NMB  NMBR  NOD1  NOD2  NODAL  NOS1  NOS2  NOTCH1  NOX1  NOX3  NOX4  NOX5  NOXA1  NPFF  NPPA  NPPB  NPPC  NPR1  NPR3  NPY  NR0B1  NR0B2  NR1D1  NR1D2  NR1H2  NR1H3  NR1H4  NR1I2  NR1I3  NR2C1  NR2C2  NR2E1  NR2E3  NR2F1  NR2F2  NR2F6  NR3C1  NR3C2  NR4A1  NR4A2  NR4A3  NR5A1  NR5A2  NR6A1  NRAS  NRG1  NRG2  NRG3  NRG4  NRIP1  NRP1  NRP2  NRTN  NTF3  NTF4  NTN1  NTS  NUDT6  NUMBL  NUP153  NUP214  NXN  OAS1  OAS2  OAS3  OASL  OBP2A  OBP2B  OGFR  OGN  OLFM4  OLR1  OPRD1  OPRK1  OPRL1  OPRM1  OPTN  ORM1  ORM2  ORMDL3  OSGIN1  OSM  OSMR  OSTN  OTUB1  OTUB2  OTUD5  OXT  OXTR  P2RX7  P2RY14  PACSIN1  PADI4  PAEP  PAK1  PAK2  PAK3  PAK4  PAK5  PAK6  PALM3  PANX1  PARD3  PARK2  PCBP1  PCBP2  PCSK1  PCSK2  PDCD1  PDCD1LG2  PDE12  PDE1A  PDE1B  PDE1C  PDF  PDGFA  PDGFB  PDGFC  PDGFD  PDGFRA  PDGFRB  PDGFRL  PDIA2  PDIA3  PDK1  PDPK1  PDYN  PELI1  PELI2  PELI3  PENK  PF4  PF4V1  PGC  PGF  PGLYRP1  PGLYRP2  PGLYRP3  PGLYRP4  PGR  PGRMC2  PHLPP1  PHLPP2  PI15  PI3  PIAS1  PIAS2  PIAS3  PIAS4  PIK3AP1  PIK3C3  PIK3CA  PIK3CB  PIK3CD  PIK3CG  PIK3R1  PIK3R2  PIK3R3  PIK3R4  PIK3R5  PIN1  PKLR  PKN1  PLA2G2A  PLA2G4A  PLA2G6  PLAAT4  PLAU  PLAUR  PLCG1  PLCG2  PLCL1  PLD2  PLEC  PLG  PLK1  PLSCR1  PLTP  PLXNA1  PLXNA2  PLXNA3  PLXNA4  PLXNB1  PLXNB2  PLXNB3  PLXNC1  PLXND1  PMAIP1  PMCH  PML  PMP2  PNOC  POLR1C  POLR1D  POLR2E  POLR2F  POLR2H  POLR2K  POLR2L  POLR3A  POLR3B  POLR3C  POLR3D  POLR3E  POLR3F  POLR3G  POLR3GL  POLR3H  POLR3K  POMC  POSTN  PPAPDC1A  PPARA  PPARD  PPARG  PPARGC1A  PPARGC1B  PPBP  PPBPP1  PPBPP2  PPIA  PPP1CA  PPP1CC  PPP2R5D  PPP3CA  PPP3CB  PPP3CC  PPP3R1  PPP3R2  PPP4C  PPY  PQBP1  PRDX1  PRDX2  PRF1  PRKACA  PRKACB  PRKACG  PRKAR1A  PRKAR1B  PRKAR2A  PRKAR2B  PRKCA  PRKCB  PRKCD  PRKCE  PRKCG  PRKCQ  PRKCSH  PRKD1  PRKDC  PRKRA  PRKX  PRL  PRLH  PRLHR  PRLR  PRMT1  PROC  PROCR  PROK1  PROK2  PROS1  PRSS3  PRSS3P2  PRTN3  PSMA7  PSMB8  PSMC1  PSMC2  PSMC3  PSMC4  PSMC5  PSMC6  PSMD1  PSMD10  PSMD11  PSMD13  PSMD14  PSMD2  PSMD3  PSMD4  PSMD5  PSMD6  PSMD7  PSMD8  PSME1  PSME2  PSME3  PSPN  PSTPIP1  PTAFR  PTCH1  PTEN  PTGDR  PTGDR2  PTGDS  PTGER1  PTGER2  PTGER3  PTGER4  PTGES  PTGES2  PTGFR  PTGS2  PTH  PTH1R  PTH2  PTH2R  PTHLH  PTK2  PTK2B  PTMA  PTN  PTPN11  PTPN2  PTPN6  PTPRC  PTX3  PURA  PYCARD  PYDC1  PYY  QRFP  R3HDML  RAB11A  RABEP1  RABEP2  RAC1  RAC2  RAC3  RAD21  RAD23A  RAET1E  RAET1G  RAET1L  RAF1  RAG1  RANBP9  RARA  RARB  RARG  RARRES2  RASGEF1B  RASGRP1  RASGRP3  RB1  RBCK1  RBP1  RBP2  RBP4  RBP5  RBP7  RCAN1  RCOR1  REG1A  REG3G  REL  RELA  RELB  REST  RETN  RETNLB  RFTN1  RFX5  RFXANK  RFXAP  RGMB  RGS2  RHBDF2  RHOA  RICTOR  RIPK1  RIPK2  RIPK3  RLN1  RLN2  RLN3  RN7SL1  RNASE2  RNASE3  RNASE7  RNASEL  RNF125  RNF135  RNF31  RNF41  RNF5  ROBO1  ROBO2  ROBO3  RORA  RORB  RORC  RPL19  RPS19  RPS27A  RPS6KA1  RPS6KA2  RPS6KA3  RPS6KA4  RPS6KA5  RPS6KB2  RSAD2  RUNX3  RUSC1  RXFP1  RXFP2  RXFP3  RXRA  RXRB  RXRG  S100A1  S100A10  S100A11  S100A12  S100A13  S100A14  S100A16  S100A2  S100A3  S100A5  S100A6  S100A7  S100A7A  S100A7L2  S100A8  S100A9  S100B  S100G  S100P  S100Z  S1PR1  S1PR2  SAA1  SAA2  SAMHD1  SARM1  SBDS  SCAF11  SCAMP5  SCARB1  SCARF1  SCG2  SCGB3A1  SCGB3A2  SCN5A  SCT  SCTR  SDC1  SDC2  SDC3  SDC4  SEBOX  SECTM1  SELE  SELK  SEM1  SEMA3A  SEMA3B  SEMA3C  SEMA3D  SEMA3E  SEMA3F  SEMA3G  SEMA4A  SEMA4B  SEMA4C  SEMA4D  SEMA4F  SEMA4G  SEMA5A  SEMA5B  SEMA6A  SEMA6B  SEMA6C  SEMA6D  SEMA7A  SEMG1  SEMG2  SENP2  SEPTIN7  SEPX1  SERPINA3  SERPINB9  SERPIND1  SERPINE1  SERPING1  SFTPA1  SFTPA2  SFTPD  SH2D1A  SH2D1B  SH3BP2  SHARPIN  SHC1  SHC2  SHC3  SHC4  SIAH1  SIAH2  SIGIRR  SIGLEC1  SIGLEC10  SIGLEC11  SIGLEC14  SIGLEC15  SIGLEC5  SIGLEC6  SIGLEC7  SIGLEC8  SIGLEC9  SIKE1  SIRPA  SIRPB1  SIRT1  SIRT2  SIVA1  SKIV2L  SKP2  SLAMF1  SLAMF6  SLAMF7  SLAMF8  SLAMF9  SLC10A2  SLC11A1  SLC15A4  SLC22A17  SLC22A3  SLC25A46  SLC29A3  SLC2A11  SLC40A1  SLIT1  SLIT2  SLPI  SLURP1  SLX4  SMAD3  SMAD4  SMAD6  SMAD7  SMAP2  SMARCA2  SMARCA4  SMARCE1  SNAP23  SNCA  SNX27  SOCS1  SOCS2  SOCS3  SOCS5  SOCS6  SOD1  SORT1  SOS1  SOS2  SP1  SPAG11A  SPAG11B  SPHK1  SPI1  SPINK5  SPON2  SPP1  SQSTM1  SRC  SREBF1  SREBF2  SRPK1  SRPK2  SSC5D  SST  SSTR1  SSTR2  SSTR5  ST2  STAB2  STAP2  STAT1  STAT2  STAT3  STAT4  STAT5A  STAT5B  STAT6  STC1  STC2  STIM1  STING1  STUB1  SUGT1  SWAP70  SYK  SYP  SYTL1  TAB1  TAB2  TAB3  TAC1  TACR1  TAFA1  TAFA2  TAFA3  TAFA4  TAFA5  TANK  TAP1  TAP2  TAPBP  TAPBPL  TAX1BP1  TBC1D27  TBK1  TBKBP1  TCEB1  TCEB2  TCF4  TCF7L2  TCHHL1  TDGF1  TDGF1P3  TEC  TECPR1  TEK  TFR2  TFRC  TG  TGFA  TGFB1  TGFB2  TGFB3  TGFBR1  TGFBR2  TGFBR3  THBS1  THEM4  THPO  THRA  THRB  TICAM1  TICAM2  TIE1  TIFA  TINAGL1  TIRAP  TK2  TKFC  TLR1  TLR10  TLR2  TLR3  TLR4  TLR5  TLR6  TLR7  TLR8  TLR9  TMED7  TMEM173  TMPRSS6  TMSB10  TMSB15A  TMSB15B  TMSB4X  TMSB4XP8  TMSB4Y  TNC  TNF  TNFAIP3  TNFAIP8L2  TNFRSF10A  TNFRSF10B  TNFRSF10C  TNFRSF10D  TNFRSF11A  TNFRSF11B  TNFRSF12A  TNFRSF13B  TNFRSF13C  TNFRSF14  TNFRSF17  TNFRSF18  TNFRSF19  TNFRSF1A  TNFRSF1B  TNFRSF21  TNFRSF25  TNFRSF4  TNFRSF6B  TNFRSF8  TNFRSF9  TNFSF10  TNFSF11  TNFSF12  TNFSF13  TNFSF13B  TNFSF14  TNFSF15  TNFSF18  TNFSF4  TNFSF8  TNFSF9  TNIP1  TNIP3  TNK1  TNRC6A  TNRC6B  TNRC6C  TOLLIP  TOMM70A  TOR2A  TP53  TP63  TP73  TPM2  TPP2  TPSB2  TPST1  TPT1  TRAC  TRADD  TRAF1  TRAF2  TRAF3  TRAF5  TRAF6  TRAFD1  TRAIP  TRAJ1  TRAJ10  TRAJ11  TRAJ12  TRAJ13  TRAJ14  TRAJ15  TRAJ16  TRAJ17  TRAJ18  TRAJ19  TRAJ2  TRAJ20  TRAJ21  TRAJ22  TRAJ23  TRAJ24  TRAJ25  TRAJ26  TRAJ27  TRAJ28  TRAJ29  TRAJ3  TRAJ30  TRAJ31  TRAJ32  TRAJ33  TRAJ34  TRAJ35  TRAJ36  TRAJ37  TRAJ38  TRAJ39  TRAJ4  TRAJ40  TRAJ41  TRAJ42  TRAJ43  TRAJ44  TRAJ45  TRAJ46  TRAJ47  TRAJ48  TRAJ49  TRAJ5  TRAJ50  TRAJ52  TRAJ53  TRAJ54  TRAJ56  TRAJ57  TRAJ58  TRAJ59  TRAJ6  TRAJ61  TRAJ7  TRAJ8  TRAJ9  TRAT1  TRAV10  TRAV1-1  TRAV1-2  TRAV12-1  TRAV12-2  TRAV12-3  TRAV13-1  TRAV13-2  TRAV14DV4  TRAV16  TRAV17  TRAV18  TRAV19  TRAV2  TRAV20  TRAV21  TRAV22  TRAV23DV6  TRAV24  TRAV25  TRAV26-1  TRAV26-2  TRAV27  TRAV29DV5  TRAV3  TRAV30  TRAV34  TRAV35  TRAV36DV7  TRAV38-1  TRAV38-2DV8  TRAV39  TRAV4  TRAV40  TRAV41  TRAV5  TRAV6  TRAV7  TRAV8-1  TRAV8-2  TRAV8-3  TRAV8-4  TRAV8-6  TRAV8-7  TRAV9-1  TRAV9-2  TRBC1  TRBC2  TRBD1  TRBD2  TRBJ1-1  TRBJ1-2  TRBJ1-3  TRBJ1-4  TRBJ1-5  TRBJ1-6  TRBJ2-1  TRBJ2-2  TRBJ2-3  TRBJ2-4  TRBJ2-5  TRBJ2-6  TRBJ2-7  TRBV10-1  TRBV10-2  TRBV10-3  TRBV11-1  TRBV11-2  TRBV11-3  TRBV12-3  TRBV12-4  TRBV12-5  TRBV13  TRBV14  TRBV15  TRBV16  TRBV17  TRBV18  TRBV19  TRBV2  TRBV20-1  TRBV24-1  TRBV25-1  TRBV27  TRBV28  TRBV29-1  TRBV30  TRBV3-1  TRBV4-1  TRBV4-2  TRBV4-3  TRBV5-1  TRBV5-4  TRBV5-5  TRBV5-6  TRBV5-7  TRBV5-8  TRBV6-1  TRBV6-2  TRBV6-3  TRBV6-4  TRBV6-5  TRBV6-6  TRBV6-7  TRBV6-8  TRBV6-9  TRBV7-2  TRBV7-3  TRBV7-4  TRBV7-6  TRBV7-7  TRBV7-8  TRBV7-9  TRBV9  TRDC  TRDD1  TRDD2  TRDD3  TRDJ1  TRDJ2  TRDJ3  TRDJ4  TRDV1  TRDV2  TRDV3  TREM1  TREM2  TREML1  TREML2  TREX1  TRGC1  TRGC2  TRGJ1  TRGJ2  TRGJP  TRGJP1  TRGJP2  TRGV2  TRGV3  TRGV4  TRGV5  TRGV8  TRGV9  TRH  TRHR  TRIB2  TRIB3  TRIM10  TRIM11  TRIM13  TRIM14  TRIM15  TRIM21  TRIM22  TRIM23  TRIM24  TRIM25  TRIM26  TRIM27  TRIM28  TRIM31  TRIM32  TRIM35  TRIM36  TRIM37  TRIM38  TRIM42  TRIM45  TRIM47  TRIM49  TRIM5  TRIM50  TRIM55  TRIM56  TRIM58  TRIM6  TRIM60  TRIM61  TRIM62  TRIM63  TRIM65  TRIM66  TRIM67  TRIM7  TRIM71  TRIM8  TRIM9  TRPC4AP  TRPM2  TRPV2  TSC1  TSC2  TSC22D3  TSHB  TSHR  TSLP  TTC6  TUBB3  TUFM  TXK  TXLNA  TXN  TXNIP  TYK2  TYMP  TYRO3  TYROBP  UBA52  UBA7  UBB  UBC  UBD  UBE2D1  UBE2D2  UBE2D3  UBE2L6  UBE2N  UBE2V1  UBE2V2  UBE2W  UBQLN1  UBR1  UBXN1  UCHL1  UCN  UCN2  UCN3  UCP2  ULBP1  ULBP2  ULBP3  ULK1  UMODL1  UNC5CL  UNC93B1  USP17L11  USP2  USP4  USP7  UTS2  UTS2B  VASP  VAV1  VAV2  VAV3  VCAM1  VDR  VEGFA  VEGFB  VEGFC  VEGFD  VENTX  VGF  VIM  VIP  VIPR1  VIPR2  VLDLR  VNN1  VPS45  VTN  WAS  WASF2  WASL  WDR34  WDR62  WFDC12  WFDC2  WFIKKN1  WIPF1  WIPF2  WIPF3  WNT2B  WNT3A  WNT5A  WNT9B  XBP1  XCL1  XCL2  XCR1  XDH  XIAP  XRCC5  XRCC6  YES1  YWHAB  YWHAE  YY1  ZAP70  ZBP1  ZBTB1  ZBTB16  ZC3H12A  ZC3HAV1  ZC3HAV1L  ZFPM1  ZFPM2  ZMYND11  ZYX |

**Supplementary Material Table S2** The gene primer sequences applied in qPCR analysis

| **Gene name** | **Forward Primer sequence (5’-3’)** | **Reverse Primer sequence (5’-3’)** |
| --- | --- | --- |
| hsa_circ_0007364 | GGAATCCACGTTCTAGTTTTTCG | TCTCGGTGTCCAGGAGTCTTC |
| hsa_circ_0000479 | GCTGAACTCCAAAAAATGAAGG | TCAAGGTGTATGCACTTGTGTATTG |
| hsa_circ_0047460 | AGAGCCGACCTCTCCTTGGA | AGACCACTCGGTGATGACCTTG |
| hsa_circ_0017252 | GGCACACACTCTAACTGAAAGCAG | CACTCTCTAGTGATGACTCAGCCTC |
| hsa_circ_0045128 | GCTTTTCAGAATCTTATCAACGACG | CATGAGGGTTGGCAGAGCAG |
| GAPDH | GAACGGGAAGCTCACTGG | GCCTGCTTCACCACCTTCT |

**Supplementary Material Table S3** The detailed description of DEGs in GSE16561

| Name | logFC | AveExpr | t | P.Value | adj.P.Val | B | regulation |
| --- | --- | --- | --- | --- | --- | --- | --- |
| ARG1 | 1.133403541 | 6.561081602 | 7.114815906 | 1.24E-09 | 1.95E-07 | 11.82180376 | up |
| MMP9 | 0.872794344 | 8.159300345 | 5.314229347 | 1.49E-06 | 3.69E-05 | 5.012040665 | up |
| APOBEC3A | 0.773620227 | 7.295281103 | 3.323366575 | 0.00148295 | 0.009790264 | -1.507076559 | up |
| ORM1 | 0.761014812 | 6.985284343 | 3.810893769 | 0.000316381 | 0.002735261 | -0.071506014 | up |
| S100A12 | 0.740522401 | 9.014003931 | 4.153159467 | 0.000100216 | 0.001084591 | 1.00830397 | up |
| FCGR3B | 0.69853107 | 8.480751889 | 3.013844312 | 0.003709877 | 0.020346991 | -2.347332518 | up |
| CA4 | 0.687281328 | 7.357964911 | 4.563378221 | 2.38E-05 | 0.000331568 | 2.369270695 | up |
| PDK4 | 0.676775111 | 6.506943247 | 7.593074133 | 1.81E-10 | 5.35E-08 | 13.67851374 | up |
| FOLR3 | 0.672633374 | 7.949634584 | 4.098201281 | 0.000120932 | 0.001261447 | 0.831285766 | up |
| LY96 | 0.672536724 | 8.646046632 | 3.933441868 | 0.000210833 | 0.001953669 | 0.308794634 | up |
| OLFM4 | 0.671268208 | 6.253626404 | 3.224137881 | 0.002001133 | 0.012549012 | -1.782849708 | up |
| CD163 | 0.667410255 | 6.573194775 | 7.377189559 | 4.32E-10 | 1.02E-07 | 12.83973957 | up |
| FTHL11 | 0.663949395 | 8.018634264 | 2.393757906 | 0.019658196 | 0.077024575 | -3.839227238 | up |
| BNIP3L | 0.647812211 | 6.716530673 | 3.491713642 | 0.000881461 | 0.006352542 | -1.026067231 | up |
| IQGAP1 | 0.646268855 | 7.578136978 | 5.965252274 | 1.21E-07 | 5.20E-06 | 7.419936077 | up |
| ACSL1 | 0.645965068 | 8.489025332 | 4.123258021 | 0.00011102 | 0.001177913 | 0.911827218 | up |
| CRISPLD2 | 0.642551321 | 7.844457053 | 5.429897364 | 9.57E-07 | 2.60E-05 | 5.433234496 | up |
| FTHL3 | 0.633789797 | 8.309525971 | 2.469009358 | 0.016264894 | 0.066308807 | -3.672853702 | up |
| HIF1A | 0.633310339 | 6.782610208 | 3.70610547 | 0.000445256 | 0.003624065 | -0.390776066 | up |
| CSPG2 | 0.633047939 | 8.338013797 | 4.617200858 | 1.96E-05 | 0.000285062 | 2.552656888 | up |
| FCGR3A | 0.629592623 | 6.991810717 | 2.054448754 | 0.0440745 | 0.142684973 | -4.53511991 | up |
| KCNJ15 | 0.625364206 | 7.033496556 | 6.44251801 | 1.83E-08 | 1.32E-06 | 9.231093518 | up |
| KIF1B | 0.614813503 | 6.893641677 | 9.420784154 | 1.19E-13 | 4.42E-10 | 20.72864477 | up |
| VNN3 | 0.60885839 | 7.477664813 | 6.896741147 | 2.99E-09 | 3.69E-07 | 10.97795444 | up |
| CYP1B1 | 0.602496087 | 6.907611766 | 5.880832772 | 1.68E-07 | 6.86E-06 | 7.103063115 | up |
| HK2 | 0.598171896 | 6.672067865 | 4.579749339 | 2.24E-05 | 0.00031695 | 2.424939897 | up |
| SKAP2 | 0.593959018 | 7.078966463 | 4.684826169 | 1.54E-05 | 0.000234692 | 2.784534976 | up |
| SDPR | 0.591355095 | 7.511366686 | 3.814142676 | 0.000313021 | 0.002712513 | -0.061518756 | up |
| RIS1 | 0.587236365 | 6.898978566 | 2.963444695 | 0.00428544 | 0.022982737 | -2.478443261 | up |
| CPD | 0.586419155 | 7.371617311 | 7.312796862 | 5.61E-10 | 1.26E-07 | 12.58971837 | up |
| FLJ20273 | 0.586249765 | 7.1791256 | 4.537128159 | 2.61E-05 | 0.000358768 | 2.280213637 | up |
| RGS2 | 0.584508721 | 10.29254361 | 7.894297265 | 5.37E-11 | 2.30E-08 | 14.84914489 | up |
| NEDD9 | 0.576820787 | 7.109357626 | 4.290405325 | 6.24E-05 | 0.000733942 | 1.45605964 | up |
| HMFN0839 | 0.567912799 | 7.207211163 | 7.258874436 | 6.97E-10 | 1.45E-07 | 12.38043613 | up |
| PADI4 | 0.567511687 | 9.021326328 | 5.193302565 | 2.35E-06 | 5.32E-05 | 4.575265866 | up |
| CKAP4 | 0.565869282 | 7.973800616 | 6.861515742 | 3.44E-09 | 4.06E-07 | 10.84190427 | up |
| PYGL | 0.563557694 | 7.95392268 | 5.183108342 | 2.44E-06 | 5.47E-05 | 4.538620083 | up |
| MCEMP1 | 0.559740104 | 7.872785183 | 4.059513956 | 0.000137932 | 0.001399676 | 0.707481716 | up |
| CEACAM8 | 0.559622173 | 6.295362287 | 2.989767123 | 0.003975225 | 0.021536035 | -2.410173451 | up |
| IL1R2 | 0.55887774 | 7.954274731 | 4.063699648 | 0.000135987 | 0.001386737 | 0.720843903 | up |
| ACOX1 | 0.558244096 | 6.679548431 | 8.516490928 | 4.38E-12 | 4.62E-09 | 17.26099843 | up |
| SNAP23 | 0.557135092 | 7.259733063 | 3.362010552 | 0.001317734 | 0.008853478 | -1.398102315 | up |
| BAZ2B | 0.556088235 | 7.696542491 | 7.773175682 | 8.75E-11 | 3.11E-08 | 14.3784962 | up |
| ANXA3 | 0.553951224 | 6.198820576 | 4.45862971 | 3.45E-05 | 0.000452404 | 2.015431031 | up |
| LRRK2 | 0.553602148 | 7.102229444 | 5.994632603 | 1.08E-07 | 4.74E-06 | 7.530492174 | up |
| DPYD | 0.553591072 | 6.856644491 | 6.808433441 | 4.26E-09 | 4.64E-07 | 10.63704231 | up |
| LAMP2 | 0.553331352 | 8.69262063 | 9.671615352 | 4.41E-14 | 2.05E-10 | 21.67879059 | up |
| SP3 | 0.550706354 | 6.725164656 | 2.84858975 | 0.00592008 | 0.029801946 | -2.770978864 | up |
| VASP | 0.549072786 | 6.876139765 | 6.361031027 | 2.53E-08 | 1.69E-06 | 8.919788197 | up |
| C5AR1 | 0.548810864 | 8.224951323 | 7.17652079 | 9.70E-10 | 1.69E-07 | 12.06098816 | up |
| MME | 0.547696754 | 8.436509645 | 4.953839042 | 5.74E-06 | 0.000109608 | 3.72211717 | up |
| TPST1 | 0.547677958 | 6.224279738 | 4.280833107 | 6.45E-05 | 0.000754047 | 1.424573719 | up |
| HAL | 0.547155128 | 7.119660738 | 6.843010979 | 3.71E-09 | 4.26E-07 | 10.77046645 | up |
| ECHDC3 | 0.546574963 | 6.37820246 | 4.413301011 | 4.05E-05 | 0.000513856 | 1.863604232 | up |
| REPS2 | 0.545407204 | 7.278211394 | 5.28102512 | 1.69E-06 | 4.09E-05 | 4.891736799 | up |
| DYSF | 0.543555303 | 8.031069277 | 4.60444198 | 2.05E-05 | 0.000295675 | 2.509089948 | up |
| SNX10 | 0.53842611 | 7.392841668 | 4.105464984 | 0.000117974 | 0.001235508 | 0.854605239 | up |
| CDC14B | 0.537865579 | 8.867510168 | 2.291839542 | 0.025258846 | 0.093391063 | -4.057711028 | up |
| SVIL | 0.537761701 | 7.849097304 | 8.378830169 | 7.62E-12 | 6.35E-09 | 16.72861453 | up |
| TAOK1 | 0.536517934 | 6.23337205 | 5.521410884 | 6.74E-07 | 1.97E-05 | 5.768689365 | up |
| CTSZ | 0.535043631 | 7.258456025 | 6.961605334 | 2.30E-09 | 3.02E-07 | 11.22867895 | up |
| IRAK3 | 0.53200215 | 7.065809289 | 5.618287213 | 4.65E-07 | 1.50E-05 | 6.125808411 | up |
| DEFA4 | 0.531161725 | 7.031507716 | 2.134695449 | 0.036671924 | 0.124179318 | -4.378758702 | up |
| ABCA1 | 0.529628405 | 7.590728234 | 5.078805591 | 3.60E-06 | 7.59E-05 | 4.16530663 | up |
| HMGB2 | 0.525622566 | 7.991694614 | 2.787320242 | 0.007011218 | 0.034114912 | -2.923403702 | up |
| RAB33B | 0.52521524 | 6.861998234 | 2.942139739 | 0.004552821 | 0.024173156 | -2.533367757 | up |
| ABHD5 | 0.524271739 | 7.115236172 | 6.416761041 | 2.03E-08 | 1.43E-06 | 9.132613704 | up |
| IRS2 | 0.522346365 | 6.904194909 | 5.210406566 | 2.20E-06 | 5.04E-05 | 4.636812839 | up |
| PLXDC2 | 0.521918745 | 6.707647414 | 10.05338429 | 9.87E-15 | 1.84E-10 | 23.11302639 | up |
| DSC2 | 0.521841673 | 6.82347676 | 4.64472186 | 1.77E-05 | 0.000263716 | 2.646828559 | up |
| MGC13057 | 0.521773883 | 7.361996936 | 3.202833828 | 0.002132645 | 0.013169811 | -1.841284918 | up |
| ST8SIA4 | 0.521543251 | 6.985800149 | 9.058677091 | 5.01E-13 | 1.14E-09 | 19.34724567 | up |
| EIF2AK2 | 0.521354822 | 8.005775301 | 5.14886706 | 2.77E-06 | 6.09E-05 | 4.415735909 | up |
| MANSC1 | 0.521038836 | 6.461784931 | 5.617333713 | 4.66E-07 | 1.50E-05 | 6.122283824 | up |
| SAP30 | 0.52021611 | 6.724799986 | 4.984080124 | 5.13E-06 | 0.000101211 | 3.828943453 | up |
| CORO1C | 0.51997451 | 7.060250653 | 7.086649988 | 1.39E-09 | 2.05E-07 | 11.71267906 | up |
| CLEC4D | 0.517210035 | 6.048791149 | 6.135981742 | 6.17E-08 | 3.21E-06 | 8.064243203 | up |
| MARCKS | 0.51707179 | 8.592341344 | 7.135715618 | 1.14E-09 | 1.85E-07 | 11.90279901 | up |
| ALDH1A1 | 0.515233298 | 6.358971601 | 4.251663583 | 7.13E-05 | 0.000819539 | 1.328860901 | up |
| SLC22A4 | 0.512422458 | 7.15392822 | 6.501320006 | 1.45E-08 | 1.10E-06 | 9.456184115 | up |
| DOCK8 | 0.512408849 | 7.886790156 | 7.858206575 | 6.21E-11 | 2.57E-08 | 14.70892314 | up |
| KLHL2 | 0.512102183 | 6.646508199 | 4.284682841 | 6.36E-05 | 0.000746355 | 1.437232106 | up |
| MEGF9 | 0.51155653 | 6.625029047 | 3.943082692 | 0.000204151 | 0.00190596 | 0.339020168 | up |
| NFIL3 | 0.511036883 | 6.869651639 | 6.081575309 | 7.64E-08 | 3.79E-06 | 7.858443642 | up |
| RSAD2 | 0.510764867 | 6.614300812 | 2.646647538 | 0.010249571 | 0.045914826 | -3.263539954 | up |
| PPP4R1 | 0.509549934 | 7.874287968 | 6.877002017 | 3.23E-09 | 3.89E-07 | 10.90170663 | up |
| PRKAR1A | 0.50620051 | 8.096407669 | 2.054477234 | 0.044071659 | 0.142684973 | -4.535065342 | up |
| FPRL1 | 0.504764276 | 7.993024786 | 5.257590072 | 1.84E-06 | 4.41E-05 | 4.806996347 | up |
| CTSS | 0.50436808 | 8.133271645 | 9.034470976 | 5.51E-13 | 1.14E-09 | 19.25452776 | up |
| MGAM | 0.504247024 | 6.209054249 | 5.782834613 | 2.46E-07 | 9.23E-06 | 6.736773388 | up |
| SLC2A11 | 0.503881043 | 6.483607442 | 3.082837689 | 0.003038025 | 0.017426551 | -2.165198102 | up |
| TTRAP | 0.503263347 | 6.420059837 | 2.179920671 | 0.032997536 | 0.114547623 | -4.288360594 | up |
| MLSTD1 | 0.50287943 | 6.796523489 | 6.761507557 | 5.14E-09 | 5.15E-07 | 10.45610654 | up |
| HIST2H2BE | 0.502569303 | 6.944050783 | 6.837318622 | 3.79E-09 | 4.26E-07 | 10.7484957 | up |
| TNFSF10 | 0.501717826 | 8.680242386 | 6.66249161 | 7.63E-09 | 6.90E-07 | 10.074882 | up |
| ANKRD22 | 0.501667847 | 6.086639263 | 4.539078128 | 2.59E-05 | 0.000357123 | 2.286820447 | up |
| RBP7 | 0.501480835 | 7.031060465 | 6.329954634 | 2.87E-08 | 1.85E-06 | 8.801267922 | up |
| PASK | -0.500976287 | 6.378583772 | -5.548619962 | 6.08E-07 | 1.81E-05 | 5.868788034 | down |
| HIST1H4C | -0.501328789 | 9.690263679 | -5.282721854 | 1.67E-06 | 4.07E-05 | 4.897877575 | down |
| BCAS4 | -0.501801482 | 6.676484521 | -5.437654799 | 9.29E-07 | 2.54E-05 | 5.461596285 | down |
| WBSCR18 | -0.502107317 | 6.747526306 | -6.742524512 | 5.54E-09 | 5.49E-07 | 10.38295891 | down |
| MT1X | -0.502190592 | 7.334062832 | -6.797466304 | 4.45E-09 | 4.74E-07 | 10.59474107 | down |
| GLTSCR2 | -0.502621806 | 10.07079344 | -6.883545182 | 3.15E-09 | 3.84E-07 | 10.92697864 | down |
| BANF1 | -0.503082384 | 7.754371022 | -6.14815054 | 5.88E-08 | 3.11E-06 | 8.110331561 | down |
| CUTA | -0.503866254 | 8.195185856 | -6.678486282 | 7.16E-09 | 6.64E-07 | 10.13640945 | down |
| MATK | -0.504783377 | 7.782320425 | -5.247623526 | 1.91E-06 | 4.54E-05 | 4.771000334 | down |
| MFGE8 | -0.507325588 | 6.738023792 | -5.664849885 | 3.88E-07 | 1.30E-05 | 6.298152874 | down |
| EIF3S5 | -0.509043157 | 8.916170082 | -7.770215714 | 8.86E-11 | 3.11E-08 | 14.36699272 | down |
| CD19 | -0.509270286 | 6.398959119 | -4.640445119 | 1.80E-05 | 0.000267175 | 2.632176752 | down |
| RGC32 | -0.51013021 | 8.259098473 | -4.882235017 | 7.47E-06 | 0.000135034 | 3.470289639 | down |
| LY9 | -0.51032825 | 6.612240428 | -6.999880996 | 1.97E-09 | 2.69E-07 | 11.37674288 | down |
| BLR1 | -0.513684414 | 6.31180718 | -4.708841825 | 1.41E-05 | 0.000217453 | 2.867264693 | down |
| OCIAD2 | -0.515388218 | 7.565422802 | -6.170895862 | 5.38E-08 | 2.93E-06 | 8.19653339 | down |
| C12orf57 | -0.516658994 | 8.228921545 | -5.209122322 | 2.21E-06 | 5.06E-05 | 4.632188926 | down |
| IL2RB | -0.518379806 | 7.651398534 | -5.556881471 | 5.89E-07 | 1.76E-05 | 5.899212879 | down |
| PLEKHA1 | -0.521299962 | 7.420358706 | -7.0440074 | 1.65E-09 | 2.32E-07 | 11.54753661 | down |
| NKG7 | -0.524595518 | 9.428894423 | -4.44987938 | 3.56E-05 | 0.000462729 | 1.986060256 | down |
| GOLGA8B | -0.524773941 | 7.897208951 | -5.603371382 | 4.92E-07 | 1.56E-05 | 6.070694033 | down |
| ICAM2 | -0.525062381 | 8.394888583 | -8.02902392 | 3.12E-11 | 1.61E-08 | 15.37239576 | down |
| CD8A | -0.526992631 | 7.987125402 | -3.713758019 | 0.000434357 | 0.0035509 | -0.367649804 | down |
| MGC2463 | -0.528353335 | 7.109141152 | -6.7246732 | 5.95E-09 | 5.83E-07 | 10.31419768 | down |
| SNRPF | -0.529810817 | 8.070574555 | -7.082990889 | 1.41E-09 | 2.05E-07 | 11.69850505 | down |
| RPL13A | -0.533327219 | 8.810298328 | -5.534093563 | 6.42E-07 | 1.88E-05 | 5.815327192 | down |
| DYRK2 | -0.534456254 | 8.105727694 | -6.531367647 | 1.29E-08 | 1.03E-06 | 9.571341977 | down |
| C16orf30 | -0.540102502 | 6.316250423 | -6.682420027 | 7.05E-09 | 6.60E-07 | 10.15154487 | down |
| FLT3LG | -0.540756317 | 6.541567541 | -7.727030807 | 1.05E-10 | 3.45E-08 | 14.19915509 | down |
| CD247 | -0.542765618 | 9.291410611 | -5.341584466 | 1.34E-06 | 3.42E-05 | 5.111358944 | down |
| EEF1G | -0.547012434 | 9.662168973 | -6.509558987 | 1.40E-08 | 1.09E-06 | 9.487751059 | down |
| MGC17330 | -0.550244142 | 8.17792368 | -5.606979792 | 4.85E-07 | 1.55E-05 | 6.084022954 | down |
| FAM108A2 | -0.553242887 | 6.87374115 | -5.926276883 | 1.41E-07 | 5.90E-06 | 7.273491499 | down |
| SPOCK2 | -0.554241118 | 8.63176505 | -5.67391974 | 3.75E-07 | 1.28E-05 | 6.331774593 | down |
| KLRB1 | -0.554622405 | 8.794839763 | -5.567073229 | 5.66E-07 | 1.71E-05 | 5.936766526 | down |
| SNURF | -0.556577441 | 7.325637031 | -7.493504896 | 2.71E-10 | 6.81E-08 | 13.29158043 | down |
| BCL11B | -0.558631247 | 7.134497713 | -6.407454124 | 2.11E-08 | 1.47E-06 | 9.097047394 | down |
| VEGFB | -0.559983531 | 7.65082875 | -8.183855285 | 1.67E-11 | 9.16E-09 | 15.97319244 | down |
| APRT | -0.564535304 | 7.620754323 | -8.331868425 | 9.21E-12 | 6.87E-09 | 16.54679988 | down |
| RPS4X | -0.567426869 | 9.486299738 | -6.20879911 | 4.63E-08 | 2.59E-06 | 8.340339902 | down |
| ITPR3 | -0.569778729 | 7.327761314 | -7.356000842 | 4.71E-10 | 1.08E-07 | 12.75745785 | down |
| ATP6V0E2L | -0.573702877 | 7.643817766 | -7.125479817 | 1.19E-09 | 1.90E-07 | 11.86312861 | down |
| FAM113B | -0.580062706 | 7.8066246 | -6.215352802 | 4.51E-08 | 2.55E-06 | 8.365224547 | down |
| LIME1 | -0.581281579 | 8.550629462 | -7.248527693 | 7.26E-10 | 1.45E-07 | 12.34028869 | down |
| NELL2 | -0.583469805 | 6.775767642 | -5.081187955 | 3.57E-06 | 7.54E-05 | 4.17379961 | down |
| AES | -0.585289005 | 8.139557087 | -6.410641482 | 2.08E-08 | 1.46E-06 | 9.109226771 | down |
| GIMAP5 | -0.588879494 | 8.123098462 | -7.260774859 | 6.91E-10 | 1.45E-07 | 12.38781052 | down |
| IL32 | -0.591522116 | 7.698609822 | -6.59190723 | 1.01E-08 | 8.61E-07 | 9.803628203 | down |
| FCRLM1 | -0.592393407 | 6.848240348 | -4.860527498 | 8.09E-06 | 0.000143702 | 3.394261088 | down |
| CD2 | -0.593909128 | 8.400220843 | -6.934348719 | 2.57E-09 | 3.28E-07 | 11.12329123 | down |
| PTPRCAP | -0.594985552 | 7.369591357 | -6.67012221 | 7.40E-09 | 6.83E-07 | 10.10423228 | down |
| BIN1 | -0.59538127 | 7.967487735 | -7.845096723 | 6.55E-11 | 2.65E-08 | 14.65798369 | down |
| LEF1 | -0.598431606 | 7.644967826 | -5.694973948 | 3.46E-07 | 1.20E-05 | 6.409885116 | down |
| CLC | -0.600394518 | 9.054291495 | -3.679543515 | 0.000485149 | 0.003887664 | -0.470811735 | down |
| GNLY | -0.604720836 | 8.957284828 | -3.514590438 | 0.000820388 | 0.00600104 | -0.959465385 | down |
| ECHDC2 | -0.613382982 | 7.543957106 | -7.621330434 | 1.62E-10 | 5.02E-08 | 13.78833315 | down |
| TNFRSF25 | -0.614550496 | 7.064178528 | -6.663463302 | 7.60E-09 | 6.90E-07 | 10.07861924 | down |
| ID3 | -0.615365599 | 6.554789677 | -8.005305295 | 3.43E-11 | 1.64E-08 | 15.28030414 | down |
| EVL | -0.618450294 | 8.541209683 | -7.614873363 | 1.66E-10 | 5.06E-08 | 13.76323713 | down |
| HLA-DQB1 | -0.63318674 | 6.377365265 | -4.413028148 | 4.06E-05 | 0.000513856 | 1.862692705 | down |
| ITK | -0.642752857 | 7.816949415 | -7.729090799 | 1.05E-10 | 3.45E-08 | 14.20716143 | down |
| CD79A | -0.646980001 | 7.759734638 | -4.648940876 | 1.75E-05 | 0.000260564 | 2.661288921 | down |
| CD79B | -0.650379677 | 8.161942544 | -6.00645434 | 1.03E-07 | 4.59E-06 | 7.575015424 | down |
| GZMK | -0.656317567 | 7.930259371 | -4.683230287 | 1.54E-05 | 0.000235472 | 2.779044486 | down |
| VPREB3 | -0.662641343 | 6.356852013 | -5.121184452 | 3.08E-06 | 6.66E-05 | 4.316623358 | down |
| FAIM3 | -0.671520274 | 8.254397877 | -6.604573321 | 9.62E-09 | 8.30E-07 | 9.85227075 | down |
| GRAP | -0.687562163 | 7.872414704 | -7.810835477 | 7.52E-11 | 2.94E-08 | 14.52484948 | down |
| CD3D | -0.707130118 | 8.874066954 | -7.173542262 | 9.82E-10 | 1.69E-07 | 12.0494391 | down |
| IL7R | -0.717920737 | 8.732156354 | -6.36087544 | 2.54E-08 | 1.69E-06 | 8.919194526 | down |
| CD6 | -0.719424409 | 7.918395998 | -7.669584735 | 1.33E-10 | 4.27E-08 | 13.9758815 | down |
| MAL | -0.770475407 | 8.514476392 | -6.408361916 | 2.10E-08 | 1.47E-06 | 9.100516089 | down |
| CCR7 | -0.844986002 | 8.201038964 | -6.089329483 | 7.41E-08 | 3.71E-06 | 7.887748404 | down |

**Supplementary Material Table S4** The detailed description of DEMs in GSE110993

| Name | logFC | AveExpr | t | P.Value | adj.P.Val | B | Regulation |
| --- | --- | --- | --- | --- | --- | --- | --- |
| hsa-mir-125a | 1.159632734 | 5.021545389 | 8.992725126 | 3.55E-11 | 1.73E-08 | 15.41285813 | up |
| hsa-miR-125a-5p | 1.145312765 | 4.988071046 | 8.891507348 | 4.82E-11 | 1.73E-08 | 15.11620665 | up |
| hsa-mir-1247 | 0.901167091 | 1.869759427 | 2.139482794 | 0.038510168 | 0.218325362 | -4.492025435 | up |
| hsa-miR-1247-3p | 0.901167091 | 1.869759427 | 2.139482794 | 0.038510168 | 0.218325362 | -4.492025435 | up |
| hsa-miR-99b-5p | 0.896423145 | 4.841618659 | 7.680354477 | 2.07E-09 | 3.72E-07 | 11.47220687 | up |
| hsa-mir-99b | 0.887619821 | 4.856995507 | 7.468230589 | 4.05E-09 | 5.83E-07 | 10.81823531 | up |
| hsa-mir-501 | 0.871105527 | 2.353016097 | 3.421217714 | 0.001442546 | 0.020365353 | -1.505204386 | up |
| hsa-miR-501-3p | 0.860427953 | 2.346429359 | 3.386380141 | 0.001592318 | 0.021631484 | -1.597692624 | up |
| hsa-mir-125b-2 | 0.806530189 | 3.303757686 | 4.48299337 | 5.98E-05 | 0.002871965 | 1.517018606 | up |
| hsa-miR-342-3p | 0.797609897 | 3.97411422 | 4.26198232 | 0.00011873 | 0.004443496 | 0.860877898 | up |
| hsa-miR-125b-2-3p | 0.79089437 | 1.999020555 | 3.161689993 | 0.002978403 | 0.031310679 | -2.181311729 | up |
| hsa-mir-143 | 0.781834258 | 6.889661427 | 2.59149245 | 0.013249643 | 0.098347867 | -3.547846639 | up |
| hsa-miR-143-3p | 0.777669713 | 6.881847385 | 2.580504956 | 0.013615533 | 0.100032491 | -3.572366766 | up |
| hsa-miR-146b-5p | 0.731480661 | 5.967152839 | 4.85457464 | 1.86E-05 | 0.001113089 | 2.642720216 | up |
| hsa-mir-99a | 0.723225962 | 4.079261439 | 3.605348258 | 0.000849864 | 0.014569095 | -1.008105886 | up |
| hsa-miR-99a-5p | 0.723225962 | 4.079261439 | 3.605348258 | 0.000849864 | 0.014569095 | -1.008105886 | up |
| hsa-mir-146b | 0.713759336 | 5.996590149 | 4.634122744 | 3.73E-05 | 0.001916061 | 1.971793625 | up |
| hsa-miR-146a-5p | 0.666877836 | 7.183538167 | 4.250436724 | 0.000123024 | 0.004443496 | 0.826922128 | up |
| hsa-mir-146a | 0.66388182 | 7.185036175 | 4.223653358 | 0.000133579 | 0.004579842 | 0.748282495 | up |
| hsa-mir-941-1 | 0.661433992 | 1.865352557 | 2.971599576 | 0.004979382 | 0.04717309 | -2.656289502 | up |
| hsa-mir-941-2 | 0.632454243 | 2.472788027 | 2.574848951 | 0.013807471 | 0.100417968 | -3.58496005 | up |
| hsa-mir-4446 | 0.614381587 | 1.80898096 | 2.327297162 | 0.025061376 | 0.164038099 | -4.116264777 | up |
| hsa-miR-4446-3p | 0.614381587 | 1.80898096 | 2.327297162 | 0.025061376 | 0.164038099 | -4.116264777 | up |
| hsa-miR-125b-5p | 0.610166815 | 3.098923485 | 3.777922648 | 0.000512472 | 0.009710005 | -0.530454082 | up |
| hsa-mir-877 | 0.60668034 | 1.728212542 | 3.252741793 | 0.002316301 | 0.02733994 | -1.947577762 | up |
| hsa-miR-877-5p | 0.60668034 | 1.728212542 | 3.252741793 | 0.002316301 | 0.02733994 | -1.947577762 | up |
| hsa-mir-3180-1 | 0.600406098 | 0.399197365 | 3.852922198 | 0.000410204 | 0.009165416 | -0.319605488 | up |
| hsa-mir-342 | 0.584479453 | 4.327147088 | 4.111336947 | 0.000188319 | 0.005895197 | 0.420566203 | up |
| hsa-mir-10b | 0.569199691 | 9.191276802 | 3.90864055 | 0.000347327 | 0.008623302 | -0.161757333 | up |
| hsa-miR-500a-3p | 0.561637707 | 3.011990931 | 3.105797982 | 0.003469699 | 0.034696989 | -2.322834259 | up |
| hsa-mir-500a | 0.557858833 | 3.015226176 | 3.077858446 | 0.003743072 | 0.036419082 | -2.393006129 | up |
| hsa-miR-10b-5p | 0.552624881 | 9.175939246 | 3.834895681 | 0.000432811 | 0.009165416 | -0.370456518 | up |
| hsa-miR-15b-5p | 0.551013862 | 3.822439405 | 2.107742654 | 0.041326239 | 0.230658081 | -4.553073015 | up |
| hsa-mir-941-4 | 0.544602116 | 2.568294415 | 2.35846261 | 0.023291928 | 0.156730727 | -4.051573397 | up |
| hsa-mir-185 | -0.501346923 | 4.456452945 | -2.692970845 | 0.010272769 | 0.081279052 | -3.317935074 | down |
| hsa-miR-185-5p | -0.502187977 | 4.434350214 | -2.773475124 | 0.008364557 | 0.070852718 | -3.131227121 | down |
| hsa-miR-16-2-3p | -0.516749161 | 6.202319623 | -3.001164193 | 0.004601525 | 0.044174641 | -2.583615978 | down |
| hsa-mir-17 | -0.517365296 | 2.902038733 | -2.648994398 | 0.01147773 | 0.088859845 | -3.418326292 | down |
| hsa-miR-17-3p | -0.549734622 | 1.333750738 | -2.533243331 | 0.015297283 | 0.108299232 | -3.676988634 | down |
| hsa-mir-532 | -0.566416642 | 3.165295696 | -2.542955208 | 0.01493694 | 0.107545969 | -3.65560286 | down |
| hsa-mir-3158-1 | -0.575240693 | 0.957486827 | -2.752439685 | 0.008828635 | 0.072793072 | -3.180373771 | down |
| hsa-mir-3158-2 | -0.575240693 | 0.957486827 | -2.752439685 | 0.008828635 | 0.072793072 | -3.180373771 | down |
| hsa-miR-942-5p | -0.583288455 | 1.962028648 | -2.085289272 | 0.043426154 | 0.240514082 | -4.595818976 | down |
| hsa-miR-3184-5p | -0.588880237 | 5.079403127 | -6.573404295 | 7.18E-08 | 6.46E-06 | 8.023552106 | down |
| hsa-miR-423-3p | -0.588880237 | 5.079403127 | -6.573404295 | 7.18E-08 | 6.46E-06 | 8.023552106 | down |
| hsa-mir-101-2 | -0.597149721 | 4.997815291 | -3.782494307 | 0.000505589 | 0.009710005 | -0.517656287 | down |
| hsa-miR-101-3p | -0.607792333 | 5.049521722 | -3.86993429 | 0.000389921 | 0.009165416 | -0.27151777 | down |
| hsa-mir-3688-1 | -0.623074611 | 0.74965764 | -2.860984707 | 0.006666689 | 0.058536778 | -2.924096142 | down |
| hsa-mir-3688-2 | -0.623074611 | 0.74965764 | -2.860984707 | 0.006666689 | 0.058536778 | -2.924096142 | down |
| hsa-miR-18a-5p | -0.628888727 | 0.822487542 | -3.285212241 | 0.002116003 | 0.02626762 | -1.863297269 | down |
| hsa-miR-193a-5p | -0.649193074 | 1.104333334 | -3.164139222 | 0.002958456 | 0.031310679 | -2.17507562 | down |
| hsa-miR-181a-2-3p | -0.672755471 | 1.990417955 | -2.695205563 | 0.010214772 | 0.081279052 | -3.312803066 | down |
| hsa-mir-193a | -0.695867157 | 1.127670376 | -3.570488503 | 0.000940223 | 0.015385464 | -1.103248612 | down |
| hsa-miR-532-5p | -0.716689212 | 2.937496051 | -3.158981867 | 0.003000607 | 0.031310679 | -2.188203688 | down |
| hsa-let-7f-5p | -0.727208716 | 7.644585703 | -7.085793832 | 1.38E-08 | 1.65E-06 | 9.629923307 | down |
| hsa-mir-196a-2 | -0.781700041 | 0.870494591 | -2.532042351 | 0.015342391 | 0.108299232 | -3.679629126 | down |
| hsa-let-7f-1 | -0.784983208 | 7.620123706 | -7.747387955 | 1.67E-09 | 3.72E-07 | 11.67801457 | down |
| hsa-miR-18a-3p | -0.818853763 | 1.661039078 | -3.424611395 | 0.001428698 | 0.020365353 | -1.496167264 | down |
| hsa-mir-18a | -0.863224543 | 1.899168566 | -3.91278285 | 0.000343046 | 0.008623302 | -0.149982423 | down |
| hsa-miR-1 | -0.899465747 | 2.117559968 | -2.94061946 | 0.005406432 | 0.050422745 | -2.731952505 | down |
| hsa-miR-660-5p | -0.936021987 | 2.814359507 | -5.183554861 | 6.48E-06 | 0.000466679 | 3.657367654 | down |
| hsa-mir-660 | -0.941817296 | 2.817257162 | -5.213495185 | 5.89E-06 | 0.000466679 | 3.750359376 | down |
| hsa-mir-1-1 | -1.063746017 | 1.821193962 | -3.098933189 | 0.003535065 | 0.034866396 | -2.340111352 | down |

**Supplementary Material Table S5** The detailed description of DECs in GSE133768

| Name | logFC | AveExpr | t | P.Value | adj.P.Val | B | Ragulation |
| --- | --- | --- | --- | --- | --- | --- | --- |
| hsa_circ_0004622 | 1.00758451 | 5.384614487 | 3.67439161 | 0.008930592 | 0.103969135 | -2.816113588 | up |
| hsa_circ_0030286 | 1.008317426 | 5.818370186 | 2.602864402 | 0.037471031 | 0.209210029 | -4.324476594 | up |
| hsa_circ_0006905 | 1.009719057 | 5.496993385 | 3.314512907 | 0.01420245 | 0.130185108 | -3.309299236 | up |
| hsa_circ_0061695 | 1.011245229 | 7.741994041 | 3.516422625 | 0.010921646 | 0.114192873 | -3.030504216 | up |
| hsa_circ_0003045 | 1.013188561 | 5.876206666 | 3.269701715 | 0.015067175 | 0.132596056 | -3.371851504 | up |
| hsa_circ_0079800 | 1.014211136 | 5.727687193 | 2.521539046 | 0.042020158 | 0.220687581 | -4.4422933 | up |
| hsa_circ_0007096 | 1.014312075 | 6.728722807 | 4.254474332 | 0.004405685 | 0.068647308 | -2.059739905 | up |
| hsa_circ_0018599 | 1.014753633 | 5.286397823 | 2.681626061 | 0.033555684 | 0.198235812 | -4.210496419 | up |
| hsa_circ_0001126 | 1.016732022 | 12.54960381 | 4.734107362 | 0.002551448 | 0.050870433 | -1.472861589 | up |
| hsa_circ_0001009 | 1.018909762 | 7.900276233 | 2.693714087 | 0.032993969 | 0.196616378 | -4.193020414 | up |
| hsa_circ_0006117 | 1.02113934 | 13.06536451 | 4.49306542 | 0.003343338 | 0.059145668 | -1.763397825 | up |
| hsa_circ_0027493 | 1.028941017 | 6.355195807 | 2.60733939 | 0.037236191 | 0.208437734 | -4.317996358 | up |
| hsa_circ_0003632 | 1.02978572 | 6.26522143 | 3.239054001 | 0.015691318 | 0.135109886 | -3.414766289 | up |
| hsa_circ_0078162 | 1.031120797 | 5.735552238 | 3.626217058 | 0.009492117 | 0.106908656 | -2.881132263 | up |
| hsa_circ_0015377 | 1.033534617 | 6.728183905 | 3.751298341 | 0.008108104 | 0.098482914 | -2.712992408 | up |
| hsa_circ_0054493 | 1.033868955 | 5.623435884 | 4.917002424 | 0.002089819 | 0.04552983 | -1.258303159 | up |
| hsa_circ_0000220 | 1.034156051 | 5.970215214 | 3.74165209 | 0.008206557 | 0.098940438 | -2.725880604 | up |
| hsa_circ_0002532 | 1.034790498 | 9.431640308 | 2.528858322 | 0.041588042 | 0.219313897 | -4.431687555 | up |
| hsa_circ_0006365 | 1.03674379 | 6.556028955 | 4.145036729 | 0.005014319 | 0.073746424 | -2.198579953 | up |
| hsa_circ_0011120 | 1.038322927 | 7.563067724 | 2.417615972 | 0.048686054 | 0.23532312 | -4.592843287 | up |
| hsa_circ_0005715 | 1.038680794 | 5.287635778 | 4.872547954 | 0.002192753 | 0.046623663 | -1.309989576 | up |
| hsa_circ_0059407 | 1.041170563 | 6.391151974 | 2.903554885 | 0.024677469 | 0.171439462 | -3.89080953 | up |
| hsa_circ_0001921 | 1.045361762 | 5.399463638 | 2.621651093 | 0.036495448 | 0.206539755 | -4.297274438 | up |
| hsa_circ_0047582 | 1.047546022 | 6.810750696 | 2.993720707 | 0.021817943 | 0.161142376 | -3.761858472 | up |
| hsa_circ_0035729 | 1.048888559 | 5.594068315 | 4.986984006 | 0.001938552 | 0.043975807 | -1.177536986 | up |
| hsa_circ_0005163 | 1.051714772 | 8.133806581 | 2.511544892 | 0.042617772 | 0.221243609 | -4.456775099 | up |
| hsa_circ_0002887 | 1.051806697 | 5.958037972 | 2.651601187 | 0.034994939 | 0.202704793 | -4.253926115 | up |
| hsa_circ_0074371 | 1.054212473 | 7.658126403 | 5.803413174 | 0.00084618 | 0.027444623 | -0.287855136 | up |
| hsa_circ_0039934 | 1.059386048 | 6.192896228 | 5.9112242 | 0.000763153 | 0.026146933 | -0.177324476 | up |
| hsa_circ_0087960 | 1.066490296 | 9.124576932 | 3.132348418 | 0.018091834 | 0.146005697 | -3.564987367 | up |
| hsa_circ_0046843 | 1.068271175 | 5.683780102 | 2.840432083 | 0.026915831 | 0.178300735 | -3.981445303 | up |
| hsa_circ_0003400 | 1.069080998 | 6.134916362 | 3.222516542 | 0.016039668 | 0.136370417 | -3.437967018 | up |
| hsa_circ_0003218 | 1.071265019 | 8.733946381 | 2.574381741 | 0.039002615 | 0.213356856 | -4.365730831 | up |
| hsa_circ_0031147 | 1.072578379 | 6.462271799 | 3.606829348 | 0.009728906 | 0.108190244 | -2.90738952 | up |
| hsa_circ_0001850 | 1.072579445 | 8.451916463 | 2.543966458 | 0.040710695 | 0.217728622 | -4.409796281 | up |
| hsa_circ_0034803 | 1.074206171 | 5.718653358 | 3.622656969 | 0.009535121 | 0.107250242 | -2.885949901 | up |
| hsa_circ_0019799 | 1.085073145 | 5.943818918 | 2.695366857 | 0.032917941 | 0.196597303 | -4.190631382 | up |
| hsa_circ_0001685 | 1.090104378 | 6.109084337 | 5.529133128 | 0.001107405 | 0.03203619 | -0.576194756 | up |
| hsa_circ_0004893 | 1.094470352 | 6.190933018 | 3.593988778 | 0.009889284 | 0.108919368 | -2.924808216 | up |
| hsa_circ_0067717 | 1.094880691 | 7.824673741 | 2.541664454 | 0.040843117 | 0.218059694 | -4.413131742 | up |
| hsa_circ_0006107 | 1.097688087 | 5.534078286 | 3.299492302 | 0.014486161 | 0.13111615 | -3.330240413 | up |
| hsa_circ_0004834 | 1.097880122 | 5.333687232 | 6.029130923 | 0.000682707 | 0.024904977 | -0.058213933 | up |
| hsa_circ_0017252 | 1.10027631 | 6.220642082 | 4.134258967 | 0.005079125 | 0.074214328 | -2.212351975 | up |
| hsa_circ_0001790 | 1.10087014 | 6.209896244 | 2.407549927 | 0.049387568 | 0.23659581 | -4.607416263 | up |
| hsa_circ_0055953 | 1.10548472 | 8.175662603 | 2.402066074 | 0.049774138 | 0.237289687 | -4.615354299 | up |
| hsa_circ_0043285 | 1.112571588 | 6.128080496 | 3.276962741 | 0.014923273 | 0.132520069 | -3.361699909 | up |
| hsa_circ_0004666 | 1.121146617 | 7.47162294 | 5.108459508 | 0.001704218 | 0.040712714 | -1.039072547 | up |
| hsa_circ_0055588 | 1.123024255 | 5.943165871 | 2.822937838 | 0.027573708 | 0.179812087 | -4.006611236 | up |
| hsa_circ_0002664 | 1.12396897 | 6.329797519 | 2.826349762 | 0.027444073 | 0.179730121 | -4.001701604 | up |
| hsa_circ_0008857 | 1.124801273 | 5.63475649 | 2.886415831 | 0.025264919 | 0.17297004 | -3.915391578 | up |
| hsa_circ_0057074 | 1.126247879 | 6.029933766 | 2.536625812 | 0.041134535 | 0.218636331 | -4.420432533 | up |
| hsa_circ_0004773 | 1.134006568 | 6.599586688 | 5.531951029 | 0.001104296 | 0.03203619 | -0.573179373 | up |
| hsa_circ_0004680 | 1.142410013 | 8.051022725 | 3.721002824 | 0.008421748 | 0.100262441 | -2.753514358 | up |
| hsa_circ_0000018 | 1.145423169 | 8.912717119 | 2.475920694 | 0.044821027 | 0.227539936 | -4.508393189 | up |
| hsa_circ_0030281 | 1.14624448 | 5.69721834 | 7.989814424 | 0.000131843 | 0.010624175 | 1.680096867 | up |
| hsa_circ_0005322 | 1.147201038 | 5.467450904 | 3.914375951 | 0.006625757 | 0.089184407 | -2.49714602 | up |
| hsa_circ_0045128 | 1.147225624 | 5.805708935 | 2.6572736 | 0.034718131 | 0.201986193 | -4.245718987 | up |
| hsa_circ_0078353 | 1.149544165 | 6.566059749 | 2.44822562 | 0.046615594 | 0.23100284 | -4.54851454 | up |
| hsa_circ_0005381 | 1.154951138 | 6.021393797 | 2.822869962 | 0.027576293 | 0.179812087 | -4.006708914 | up |
| hsa_circ_0079347 | 1.15787279 | 5.982424313 | 3.987078433 | 0.006063331 | 0.083938273 | -2.402179173 | up |
| hsa_circ_0002793 | 1.159592011 | 6.420327912 | 3.44126437 | 0.012034984 | 0.119883541 | -3.133678923 | up |
| hsa_circ_0036399 | 1.159607078 | 5.883366995 | 3.638757408 | 0.009342318 | 0.106299625 | -2.864176165 | up |
| hsa_circ_0001746 | 1.160045701 | 5.937365496 | 2.578700913 | 0.038766206 | 0.213356856 | -4.359474116 | up |
| hsa_circ_0031608 | 1.160443272 | 5.356063888 | 3.024904258 | 0.020913254 | 0.157366774 | -3.717418266 | up |
| hsa_circ_0003338 | 1.161439225 | 5.831114393 | 3.126612024 | 0.018231637 | 0.146658119 | -3.573097074 | up |
| hsa_circ_0000613 | 1.163531769 | 5.482681002 | 2.871105401 | 0.025802296 | 0.174351186 | -3.937368481 | up |
| hsa_circ_0009074 | 1.164769402 | 5.196243152 | 3.150627305 | 0.017654001 | 0.144744041 | -3.539168433 | up |
| hsa_circ_0006324 | 1.167136672 | 8.988276 | 6.275673942 | 0.000543612 | 0.022067358 | 0.185007725 | up |
| hsa_circ_0079330 | 1.174022797 | 6.47715232 | 2.876207249 | 0.025621888 | 0.174112742 | -3.930043375 | up |
| hsa_circ_0006095 | 1.174322919 | 5.131839792 | 3.093218663 | 0.019068898 | 0.149823428 | -3.620371747 | up |
| hsa_circ_0001434 | 1.174728693 | 6.871792388 | 2.534110139 | 0.041280845 | 0.21885685 | -4.424077692 | up |
| hsa_circ_0003572 | 1.180025279 | 6.293322213 | 3.012599065 | 0.021265356 | 0.158446757 | -3.73494441 | up |
| hsa_circ_0004592 | 1.183080318 | 8.393699026 | 2.734894095 | 0.031153689 | 0.191026424 | -4.133529091 | up |
| hsa_circ_0001011 | 1.185513839 | 5.328786633 | 5.227587561 | 0.00150484 | 0.038023414 | -0.905396493 | up |
| hsa_circ_0005633 | 1.190209979 | 5.744111116 | 3.270751981 | 0.015046268 | 0.132520069 | -3.370382759 | up |
| hsa_circ_0039444 | 1.192091514 | 7.486607065 | 3.011643735 | 0.021292956 | 0.158446757 | -3.736305635 | up |
| hsa_circ_0047460 | 1.194006371 | 13.02357271 | 8.717707556 | 7.79E-05 | 0.008323557 | 2.225488924 | up |
| hsa_circ_0006776 | 1.196347803 | 6.041164866 | 2.713300322 | 0.032104775 | 0.193452766 | -4.164715999 | up |
| hsa_circ_0072397 | 1.199141081 | 5.273042106 | 6.312784964 | 0.00052559 | 0.02166154 | 0.220948682 | up |
| hsa_circ_0001741 | 1.200184615 | 7.324487409 | 2.897192224 | 0.024893836 | 0.171979294 | -3.899932836 | up |
| hsa_circ_0065307 | 1.203454275 | 6.330940556 | 3.271225153 | 0.015036859 | 0.132520069 | -3.369721091 | up |
| hsa_circ_0086736 | 1.205571986 | 5.616792427 | 2.965650655 | 0.022668184 | 0.165385848 | -3.801932912 | up |
| hsa_circ_0088333 | 1.207996198 | 5.550054764 | 3.627144463 | 0.009480949 | 0.106908656 | -2.879877552 | up |
| hsa_circ_0059347 | 1.211867818 | 7.179921279 | 2.797970502 | 0.028542343 | 0.182474964 | -4.042559461 | up |
| hsa_circ_0007656 | 1.21615254 | 5.78351101 | 2.40606723 | 0.049491779 | 0.236812653 | -4.609562592 | up |
| hsa_circ_0002903 | 1.219386272 | 5.896605072 | 4.081282276 | 0.005411435 | 0.077394275 | -2.280302596 | up |
| hsa_circ_0000535 | 1.222485361 | 7.843800812 | 3.420548355 | 0.012363161 | 0.121141024 | -3.16224525 | up |
| hsa_circ_0001682 | 1.224176288 | 6.758779393 | 2.493780566 | 0.043701989 | 0.224367694 | -4.482515733 | up |
| hsa_circ_0001550 | 1.230603805 | 6.175362833 | 2.88994971 | 0.025142585 | 0.172648328 | -3.910321311 | up |
| hsa_circ_0006886 | 1.233134052 | 6.376082211 | 5.399732777 | 0.001261357 | 0.034221453 | -0.715871098 | up |
| hsa_circ_0000479 | 1.234028079 | 5.836451401 | 3.015854513 | 0.02117159 | 0.158124074 | -3.730306407 | up |
| hsa_circ_0030777 | 1.240477208 | 5.993881014 | 5.527772295 | 0.00110891 | 0.03203619 | -0.577651358 | up |
| hsa_circ_0054685 | 1.241996381 | 6.207268522 | 3.654314834 | 0.009160063 | 0.105560678 | -2.843170911 | up |
| hsa_circ_0003198 | 1.246006105 | 5.899591068 | 3.782361868 | 0.007799765 | 0.096363682 | -2.67157959 | up |
| hsa_circ_0006868 | 1.248804558 | 6.138518464 | 3.497932409 | 0.011184733 | 0.115572009 | -3.055818554 | up |
| hsa_circ_0028255 | 1.260505259 | 6.549890038 | 2.830371329 | 0.027292106 | 0.179375123 | -3.995915637 | up |
| hsa_circ_0083996 | 1.261010319 | 5.447890584 | 2.43979674 | 0.047176453 | 0.232183836 | -4.560723052 | up |
| hsa_circ_0001630 | 1.261192941 | 5.600657143 | 6.854446916 | 0.000326652 | 0.016637672 | 0.726422535 | up |
| hsa_circ_0087964 | 1.264692347 | 5.264096209 | 4.334317706 | 0.004013319 | 0.065493183 | -1.959599347 | up |
| hsa_circ_0038673 | 1.265590427 | 6.382605787 | 4.931221435 | 0.002058045 | 0.045260222 | -1.241833585 | up |
| hsa_circ_0008107 | 1.269701027 | 7.179367314 | 2.806863557 | 0.02819325 | 0.181858254 | -4.029750958 | up |
| hsa_circ_0008420 | 1.271921873 | 6.010182636 | 3.476928251 | 0.011491998 | 0.11762142 | -3.084629099 | up |
| hsa_circ_0004479 | 1.275123092 | 7.549124857 | 2.59408862 | 0.037936092 | 0.210717037 | -4.337185945 | up |
| hsa_circ_0002266 | 1.280071554 | 5.971047962 | 2.493116191 | 0.043743091 | 0.224388548 | -4.483478394 | up |
| hsa_circ_0001473 | 1.284045128 | 6.604376228 | 3.940415594 | 0.006417964 | 0.087391139 | -2.463041685 | up |
| hsa_circ_0005227 | 1.28680721 | 6.19133768 | 7.61508142 | 0.00017569 | 0.012734077 | 1.380062347 | up |
| hsa_circ_0001168 | 1.290010087 | 5.655774097 | 3.388999416 | 0.01288179 | 0.123752282 | -3.205853695 | up |
| hsa_circ_0047274 | 1.291125605 | 6.816464588 | 2.826612579 | 0.027434114 | 0.179730121 | -4.001323449 | up |
| hsa_circ_0005101 | 1.294589231 | 8.153629799 | 3.212567787 | 0.01625325 | 0.137218599 | -3.451938948 | up |
| hsa_circ_0055945 | 1.304605189 | 7.065746949 | 3.073202576 | 0.019590499 | 0.152076357 | -3.648760778 | up |
| hsa_circ_0008865 | 1.308118221 | 6.009532778 | 2.600484396 | 0.037596563 | 0.209481095 | -4.327923246 | up |
| hsa_circ_0003621 | 1.315033559 | 6.917911567 | 2.531792261 | 0.041416133 | 0.21885685 | -4.427436275 | up |
| hsa_circ_0032825 | 1.32046919 | 5.304815856 | 4.32250763 | 0.004068832 | 0.065938477 | -1.974350189 | up |
| hsa_circ_0000839 | 1.333508488 | 6.183989717 | 3.312363295 | 0.01424268 | 0.130222239 | -3.312294509 | up |
| hsa_circ_0050525 | 1.334406886 | 5.928262376 | 5.193200169 | 0.001559567 | 0.038713104 | -0.943770012 | up |
| hsa_circ_0004621 | 1.335131718 | 5.716302713 | 4.535461964 | 0.00318616 | 0.057847574 | -1.711652127 | up |
| hsa_circ_0047376 | 1.336702074 | 5.606731913 | 6.120099728 | 0.000627165 | 0.024100553 | 0.032439262 | up |
| hsa_circ_0085045 | 1.340289104 | 7.892720743 | 2.761496712 | 0.030022765 | 0.187566732 | -4.095137666 | up |
| hsa_circ_0034972 | 1.347953579 | 7.188319819 | 2.725189113 | 0.031577404 | 0.191989191 | -4.147543027 | up |
| hsa_circ_0002943 | 1.348479963 | 7.438124168 | 2.567462642 | 0.03938448 | 0.214784656 | -4.375754297 | up |
| hsa_circ_0003308 | 1.358416052 | 5.372462136 | 3.928278528 | 0.006513909 | 0.088500811 | -2.478925193 | up |
| hsa_circ_0079477 | 1.374491865 | 5.74064696 | 2.906480986 | 0.024578639 | 0.171226332 | -3.88661484 | up |
| hsa_circ_0079804 | 1.377863835 | 8.061670569 | 2.538431533 | 0.041029849 | 0.21824646 | -4.417816099 | up |
| hsa_circ_0005768 | 1.378073034 | 6.707189763 | 3.316106451 | 0.014172706 | 0.130133403 | -3.307079142 | up |
| hsa_circ_0003553 | 1.380729789 | 5.550406514 | 3.257029377 | 0.015321931 | 0.133615518 | -3.389583126 | up |
| hsa_circ_0008999 | 1.38707898 | 5.567630664 | 2.737473779 | 0.031042075 | 0.190836559 | -4.129804761 | up |
| hsa_circ_0000827 | 1.387913222 | 6.277402211 | 2.646567878 | 0.035242503 | 0.203206688 | -4.261209361 | up |
| hsa_circ_0006337 | 1.391702279 | 6.042726887 | 3.100283478 | 0.018888375 | 0.148982232 | -3.610360936 | up |
| hsa_circ_0000832 | 1.403622037 | 6.196345398 | 4.980136032 | 0.001952799 | 0.044113657 | -1.18540797 | up |
| hsa_circ_0001808 | 1.408864089 | 5.377876709 | 3.178253654 | 0.017013792 | 0.140974171 | -3.500212214 | up |
| hsa_circ_0078786 | 1.418503469 | 5.97488601 | 3.097188977 | 0.01896722 | 0.149385879 | -3.614745228 | up |
| hsa_circ_0003410 | 1.419371618 | 5.604497403 | 3.28213796 | 0.014821617 | 0.132049353 | -3.354468187 | up |
| hsa_circ_0001191 | 1.426681355 | 8.294174385 | 2.717120898 | 0.031934292 | 0.192855976 | -4.159196641 | up |
| hsa_circ_0071036 | 1.427215694 | 6.863434449 | 2.608797325 | 0.037160015 | 0.208227213 | -4.31588521 | up |
| hsa_circ_0049224 | 1.429570195 | 9.689271581 | 2.600975263 | 0.037570636 | 0.209481095 | -4.327212379 | up |
| hsa_circ_0003805 | 1.44868708 | 6.933308952 | 2.746828576 | 0.030640859 | 0.189279174 | -4.1163017 | up |
| hsa_circ_0006097 | 1.452515527 | 5.69332819 | 6.015313205 | 0.000691621 | 0.025060806 | -0.072078042 | up |
| hsa_circ_0004956 | 1.463322387 | 6.258546631 | 3.766895964 | 0.007951641 | 0.097348997 | -2.692180871 | up |
| hsa_circ_0003914 | 1.465258686 | 6.586207413 | 2.510888794 | 0.042657314 | 0.221342466 | -4.457725804 | up |
| hsa_circ_0011333 | 1.473604324 | 6.277009306 | 3.253832032 | 0.015386942 | 0.133615518 | -3.394059869 | up |
| hsa_circ_0000120 | 1.48089223 | 5.845319262 | 2.466793929 | 0.045404348 | 0.229101005 | -4.521616029 | up |
| hsa_circ_0042965 | 1.481989035 | 6.090256137 | 2.453493017 | 0.04626862 | 0.230154624 | -4.540884562 | up |
| hsa_circ_0009158 | 1.484253552 | 5.842829517 | 3.143529233 | 0.01782265 | 0.145244511 | -3.54919038 | up |
| hsa_circ_0001771 | 1.484416713 | 5.997682514 | 3.475329011 | 0.011515767 | 0.117753081 | -3.086825068 | up |
| hsa_circ_0003030 | 1.487416214 | 5.716013965 | 2.60189706 | 0.037522 | 0.209386332 | -4.325877455 | up |
| hsa_circ_0001403 | 1.496032193 | 5.682965994 | 2.539797787 | 0.040950826 | 0.218128138 | -4.415836451 | up |
| hsa_circ_0004463 | 1.496813449 | 6.304299955 | 2.810364014 | 0.028057087 | 0.181676857 | -4.024710571 | up |
| hsa_circ_0083957 | 1.498783941 | 6.913978626 | 2.512853261 | 0.042539035 | 0.221166655 | -4.454879237 | up |
| hsa_circ_0004349 | 1.500294437 | 7.338648847 | 2.868042863 | 0.025911241 | 0.174610916 | -3.941766452 | up |
| hsa_circ_0004914 | 1.504421707 | 6.83087013 | 3.995187935 | 0.006003933 | 0.083628366 | -2.391635066 | up |
| hsa_circ_0006987 | 1.50586558 | 6.230680321 | 4.945194763 | 0.002027346 | 0.044859179 | -1.225678091 | up |
| hsa_circ_0023944 | 1.508465665 | 5.528856046 | 2.940747002 | 0.023452203 | 0.167334631 | -3.837540969 | up |
| hsa_circ_0023936 | 1.517210489 | 5.541934396 | 2.612576328 | 0.036963324 | 0.207988523 | -4.31041327 | up |
| hsa_circ_0008075 | 1.524570279 | 6.8297964 | 2.712321493 | 0.032148607 | 0.193500922 | -4.166130153 | up |
| hsa_circ_0000389 | 1.526580391 | 5.977995226 | 2.557723476 | 0.039928628 | 0.216549135 | -4.389864056 | up |
| hsa_circ_0019058 | 1.560885735 | 6.681946013 | 2.532604452 | 0.041368675 | 0.21885685 | -4.426259416 | up |
| hsa_circ_0070933 | 1.570922688 | 8.636350348 | 2.418170732 | 0.048647694 | 0.235252072 | -4.592040067 | up |
| hsa_circ_0002433 | 1.586314731 | 5.437924861 | 2.923810379 | 0.024001918 | 0.168842158 | -3.861785474 | up |
| hsa_circ_0064794 | 1.586527959 | 6.35073648 | 5.252589615 | 0.001466403 | 0.037521856 | -0.877604367 | up |
| hsa_circ_0024604 | 1.610648758 | 13.01898583 | 2.455642002 | 0.046127833 | 0.230031034 | -4.537771574 | up |
| hsa_circ_0004516 | 1.615278923 | 6.296107439 | 3.306442802 | 0.014354123 | 0.130577778 | -3.320546968 | up |
| hsa_circ_0007882 | 1.634752309 | 7.351767524 | 2.721690991 | 0.031731619 | 0.192213291 | -4.152595318 | up |
| hsa_circ_0001736 | 1.635651059 | 5.339817185 | 3.297907157 | 0.014516458 | 0.131170468 | -3.332451914 | up |
| hsa_circ_0000826 | 1.645553224 | 5.585049663 | 2.725469099 | 0.031565095 | 0.191989191 | -4.14713867 | up |
| hsa_circ_0004169 | 1.647841959 | 6.339540659 | 4.873296363 | 0.002190974 | 0.046623663 | -1.309116956 | up |
| hsa_circ_0001649 | 1.649325348 | 5.687470351 | 5.074652174 | 0.001766078 | 0.041637791 | -1.077388443 | up |
| hsa_circ_0003264 | 1.660699236 | 8.163832853 | 2.961665991 | 0.022791724 | 0.165514151 | -3.807626952 | up |
| hsa_circ_0062649 | 1.669309259 | 6.483937367 | 3.613607872 | 0.009645391 | 0.107700193 | -2.89820332 | up |
| hsa_circ_0080342 | 1.669363236 | 6.752217851 | 2.733723331 | 0.031204484 | 0.191127071 | -4.135219442 | up |
| hsa_circ_0002008 | 1.670319473 | 6.415859727 | 3.206437484 | 0.016386384 | 0.137803872 | -3.460553703 | up |
| hsa_circ_0009145 | 1.673557684 | 6.343970056 | 2.879539904 | 0.025504766 | 0.173754238 | -3.925259404 | up |
| hsa_circ_0004800 | 1.682139101 | 6.592838593 | 2.768097815 | 0.029748923 | 0.186760969 | -4.085616725 | up |
| hsa_circ_0023509 | 1.696651433 | 6.222599065 | 2.770498254 | 0.029649999 | 0.186359125 | -4.082155066 | up |
| hsa_circ_0001314 | 1.701999247 | 5.721069931 | 2.695547744 | 0.032909631 | 0.196597303 | -4.190369922 | up |
| hsa_circ_0007218 | 1.73590593 | 7.663018659 | 2.583945369 | 0.038481168 | 0.212759679 | -4.35187741 | up |
| hsa_circ_0004596 | 1.739578176 | 6.258253021 | 3.369607769 | 0.013212265 | 0.125694298 | -3.232719287 | up |
| hsa_circ_0030388 | 1.749565266 | 8.476333419 | 2.401069987 | 0.04984469 | 0.237416393 | -4.616796073 | up |
| hsa_circ_0006732 | 1.752956283 | 7.26185415 | 3.076470149 | 0.019504313 | 0.151843959 | -3.644123711 | up |
| hsa_circ_0001178 | 1.777638294 | 7.926482863 | 2.57611496 | 0.038907567 | 0.213356856 | -4.363220074 | up |
| hsa_circ_0031787 | 1.779947937 | 8.005215991 | 2.545335535 | 0.040632153 | 0.217631937 | -4.40781259 | up |
| hsa_circ_0057521 | 1.791148681 | 5.823472605 | 3.038103871 | 0.020542496 | 0.156311456 | -3.698633299 | up |
| hsa_circ_0020092 | 1.794254568 | 6.821963313 | 3.39181786 | 0.012834509 | 0.12362804 | -3.201952842 | up |
| hsa_circ_0005067 | 1.80031094 | 7.062058385 | 3.121464957 | 0.018358067 | 0.147079363 | -3.580376468 | up |
| hsa_circ_0023942 | 1.804345743 | 5.661570865 | 2.509477624 | 0.04274249 | 0.221677014 | -4.459770625 | up |
| hsa_circ_0003489 | 1.808276125 | 7.454207822 | 2.948622982 | 0.023201164 | 0.166990098 | -3.826274266 | up |
| hsa_circ_0000982 | 1.814764024 | 6.01569705 | 3.01700215 | 0.021138641 | 0.158124074 | -3.728671603 | up |
| hsa_circ_0044197 | 1.830442527 | 8.85702727 | 2.825908823 | 0.02746079 | 0.179730121 | -4.002336058 | up |
| hsa_circ_0042992 | 1.83797405 | 8.671159062 | 2.85661781 | 0.026322007 | 0.176360851 | -3.958179048 | up |
| hsa_circ_0000475 | 1.847552336 | 5.529094283 | 3.644499141 | 0.009274595 | 0.106195445 | -2.856419905 | up |
| hsa_circ_0001278 | 1.850160934 | 7.664717676 | 2.670417268 | 0.034085552 | 0.199596414 | -4.22670597 | up |
| hsa_circ_0000889 | 1.863486628 | 6.135671983 | 3.343733316 | 0.013667633 | 0.127492505 | -3.268638179 | up |
| hsa_circ_0044195 | 1.88630003 | 9.42418436 | 2.581804821 | 0.038597241 | 0.213001817 | -4.35497799 | up |
| hsa_circ_0001414 | 1.897091727 | 6.930634882 | 3.224032956 | 0.01600738 | 0.136370417 | -3.435838343 | up |
| hsa_circ_0003942 | 1.900561069 | 6.282676629 | 3.646122026 | 0.009255551 | 0.106195445 | -2.854228449 | up |
| hsa_circ_0013737 | 1.910514034 | 5.959812339 | 3.386983278 | 0.012915727 | 0.123857924 | -3.208644727 | up |
| hsa_circ_0009154 | 1.913698406 | 8.251414365 | 2.961130019 | 0.022808396 | 0.165514151 | -3.80839295 | up |
| hsa_circ_0001174 | 1.937660843 | 6.633549042 | 4.413202138 | 0.003663404 | 0.062690065 | -1.861620543 | up |
| hsa_circ_0004542 | 1.95229023 | 8.026393353 | 2.523155899 | 0.041924301 | 0.220291289 | -4.439950444 | up |
| hsa_circ_0007364 | 1.956499901 | 7.463206139 | 2.926334585 | 0.023919125 | 0.168589236 | -3.858170711 | up |
| hsa_circ_0003956 | 1.956959052 | 6.838496291 | 2.785741242 | 0.0290299 | 0.184367639 | -4.060180346 | up |
| hsa_circ_0001522 | 2.046712657 | 6.019591038 | 2.745155045 | 0.03071223 | 0.189611583 | -4.118717033 | up |
| hsa_circ_0017311 | 2.047452882 | 6.537399802 | 3.120991154 | 0.018369753 | 0.147079363 | -3.581046693 | up |
| hsa_circ_0002254 | 2.05597468 | 8.34478237 | 2.627800111 | 0.036181955 | 0.206183024 | -4.28837273 | up |
| hsa_circ_0000418 | 2.062119761 | 5.835338204 | 2.547297629 | 0.040519865 | 0.217496526 | -4.404969685 | up |
| hsa_circ_0003598 | 2.093646463 | 7.297219249 | 3.427524149 | 0.012251578 | 0.12089943 | -3.152619895 | up |
| hsa_circ_0013729 | 2.105610211 | 6.411669544 | 2.971609363 | 0.022484776 | 0.164269698 | -3.793420415 | up |
| hsa_circ_0003908 | 2.111620025 | 6.52219794 | 3.483352281 | 0.011397058 | 0.116939282 | -3.075811401 | up |
| hsa_circ_0008260 | 2.114482186 | 8.376541253 | 2.544615371 | 0.040673448 | 0.217728622 | -4.408856053 | up |
| hsa_circ_0000339 | 2.114889718 | 6.426296438 | 3.240079051 | 0.015669997 | 0.135109886 | -3.413329233 | up |
| hsa_circ_0006801 | 2.152132621 | 6.843889258 | 3.035248162 | 0.020622107 | 0.156427465 | -3.70269605 | up |
| hsa_circ_0008620 | 2.163716498 | 7.585146886 | 2.968715615 | 0.022573646 | 0.16480746 | -3.797554003 | up |
| hsa_circ_0005752 | 2.164498021 | 6.438599109 | 3.222578373 | 0.01603835 | 0.136370417 | -3.437880218 | up |
| hsa_circ_0001085 | 2.184707014 | 5.862299047 | 4.263118708 | 0.004361216 | 0.068324721 | -2.048850937 | up |
| hsa_circ_0000097 | 2.188221177 | 6.769656397 | 4.303938565 | 0.004157846 | 0.066414818 | -1.997586241 | up |
| hsa_circ_0030720 | 2.266005353 | 6.915282088 | 2.75774277 | 0.030179684 | 0.187993844 | -4.100553057 | up |
| hsa_circ_0004808 | 2.284905119 | 6.393735029 | 4.536549352 | 0.003182238 | 0.057847574 | -1.710328573 | up |
| hsa_circ_0004494 | 2.286808108 | 7.43176592 | 4.141898031 | 0.005033096 | 0.073841543 | -2.202588819 | up |
| hsa_circ_0075341 | 2.36275143 | 6.923435207 | 3.102277102 | 0.018837767 | 0.148909373 | -3.607536866 | up |
| hsa_circ_0007270 | 2.379916352 | 6.900115676 | 4.113092478 | 0.005209111 | 0.075569009 | -2.239450204 | up |
| hsa_circ_0000607 | 2.462613175 | 6.41250151 | 4.110093455 | 0.005227825 | 0.075569009 | -2.243295174 | up |
| hsa_circ_0083092 | 2.524176554 | 7.840664161 | 2.708561268 | 0.032317578 | 0.19430134 | -4.171563072 | up |
| hsa_circ_0092337 | 2.61293789 | 9.342789697 | 3.632863453 | 0.009412398 | 0.106759535 | -2.872142809 | up |
| hsa_circ_0007290 | 2.627447828 | 6.641681088 | 4.285030039 | 0.004250713 | 0.067006123 | -2.021301318 | up |
| hsa_circ_0049637 | 2.632040473 | 7.703602587 | 4.152639535 | 0.004969154 | 0.073603458 | -2.188875559 | up |
| hsa_circ_0001050 | 2.847254638 | 6.480760777 | 2.926452404 | 0.023915268 | 0.168589236 | -3.858002001 | up |
| hsa_circ_0004099 | -3.522270769 | 8.023257837 | -8.149629289 | 0.000117047 | 0.009957516 | 1.803948745 | down |
| hsa_circ_0082319 | -3.49189833 | 10.30753549 | -13.42881123 | 5.29E-06 | 0.002196312 | 4.860928496 | down |
| hsa_circ_0052372 | -3.417858234 | 9.416583038 | -14.88727669 | 2.75E-06 | 0.001933645 | 5.45104418 | down |
| hsa_circ_0087631 | -3.378034393 | 10.24018547 | -15.20001495 | 2.41E-06 | 0.001933645 | 5.56730344 | down |
| hsa_circ_0045932 | -3.246570775 | 8.745579582 | -15.80379398 | 1.88E-06 | 0.001933645 | 5.782442064 | down |
| hsa_circ_0010027 | -3.172735351 | 8.924866734 | -14.64850697 | 3.04E-06 | 0.001933645 | 5.359961011 | down |
| hsa_circ_0092342 | -3.101481741 | 9.459769267 | -22.27356257 | 2.06E-07 | 0.001114388 | 7.496311385 | down |
| hsa_circ_0004183 | -2.958948746 | 12.27730483 | -6.210826647 | 0.000576806 | 0.02315371 | 0.121788045 | down |
| hsa_circ_0051778 | -2.93608861 | 10.68574776 | -18.86276046 | 6.03E-07 | 0.001933645 | 6.710129136 | down |
| hsa_circ_0007059 | -2.907222772 | 8.228754467 | -17.08209416 | 1.14E-06 | 0.001933645 | 6.200752426 | down |
| hsa_circ_0007850 | -2.876613983 | 10.96137316 | -15.6871559 | 1.97E-06 | 0.001933645 | 5.741807787 | down |
| hsa_circ_0001666 | -2.758374364 | 13.4282306 | -5.337547549 | 0.001343802 | 0.035477681 | -0.783842256 | down |
| hsa_circ_0000367 | -2.737824574 | 14.04104763 | -4.819944365 | 0.00232195 | 0.047848129 | -1.371535114 | down |
| hsa_circ_0004121 | -2.72850462 | 11.61065046 | -13.56242836 | 4.97E-06 | 0.002196312 | 4.918507647 | down |
| hsa_circ_0000094 | -2.676573821 | 6.986655466 | -17.03199935 | 1.16E-06 | 0.001933645 | 6.185244797 | down |
| hsa_circ_0028883 | -2.659347026 | 9.416004741 | -7.572764603 | 0.000181612 | 0.012734077 | 1.345305136 | down |
| hsa_circ_0028882 | -2.463170556 | 9.846428042 | -8.112700777 | 0.00012029 | 0.010068902 | 1.775542366 | down |
| hsa_circ_0029965 | -2.45526708 | 8.715338918 | -7.158219089 | 0.000253379 | 0.014397238 | 0.994972366 | down |
| hsa_circ_0007376 | -2.440244161 | 7.178670956 | -16.66502542 | 1.34E-06 | 0.001933645 | 6.069512076 | down |
| hsa_circ_0092299 | -2.420964976 | 12.1395374 | -13.45689303 | 5.22E-06 | 0.002196312 | 4.873092174 | down |
| hsa_circ_0075393 | -2.417378409 | 11.01198423 | -15.57090324 | 2.06E-06 | 0.001933645 | 5.700872916 | down |
| hsa_circ_0055243 | -2.404615802 | 8.050341807 | -15.17151603 | 2.43E-06 | 0.001933645 | 5.55684888 | down |
| hsa_circ_0090364 | -2.400648884 | 10.22180199 | -13.05692988 | 6.32E-06 | 0.002339578 | 4.696641703 | down |
| hsa_circ_0048148 | -2.388456854 | 6.657564674 | -7.797233693 | 0.000152586 | 0.011695375 | 1.527623818 | down |
| hsa_circ_0007117 | -2.386383409 | 8.666910064 | -11.97245143 | 1.09E-05 | 0.002874604 | 4.181178721 | down |
| hsa_circ_0040016 | -2.368429951 | 6.788118638 | -11.16183673 | 1.69E-05 | 0.003658129 | 3.756662089 | down |
| hsa_circ_0000691 | -2.357029761 | 14.17753509 | -4.333808653 | 0.004015695 | 0.065493183 | -1.960234716 | down |
| hsa_circ_0004194 | -2.337095709 | 9.105666422 | -13.16744669 | 5.99E-06 | 0.002339578 | 4.746095374 | down |
| hsa_circ_0079201 | -2.311895656 | 9.706280159 | -10.60042887 | 2.34E-05 | 0.00420566 | 3.44059983 | down |
| hsa_circ_0000288 | -2.305823729 | 13.03559872 | -4.631598594 | 0.002859346 | 0.054167051 | -1.595334832 | down |
| hsa_circ_0011474 | -2.282657249 | 8.397277467 | -10.64516217 | 2.28E-05 | 0.00420566 | 3.466488997 | down |
| hsa_circ_0008685 | -2.280225863 | 7.888180238 | -3.456733966 | 0.011796103 | 0.118725802 | -3.112382891 | down |
| hsa_circ_0001257 | -2.27634529 | 9.905796081 | -14.66357716 | 3.02E-06 | 0.001933645 | 5.365770553 | down |
| hsa_circ_0068669 | -2.274394324 | 10.34931626 | -14.3358463 | 3.49E-06 | 0.002061684 | 5.23754226 | down |
| hsa_circ_0000122 | -2.25736722 | 13.66560146 | -7.145992825 | 0.00025594 | 0.014397238 | 0.984361598 | down |
| hsa_circ_0021652 | -2.212175055 | 12.37654157 | -4.613001934 | 0.002919532 | 0.054758108 | -1.617725029 | down |
| hsa_circ_0075829 | -2.202584126 | 7.085731582 | -14.93346975 | 2.69E-06 | 0.001933645 | 5.468430823 | down |
| hsa_circ_0045905 | -2.185755473 | 10.50659811 | -14.06099768 | 3.95E-06 | 0.002115272 | 5.126877223 | down |
| hsa_circ_0007158 | -2.175388259 | 11.49817265 | -12.93097661 | 6.72E-06 | 0.002339578 | 4.639616246 | down |
| hsa_circ_0050102 | -2.155559486 | 9.029156506 | -11.70773842 | 1.26E-05 | 0.003082461 | 4.046472015 | down |
| hsa_circ_0018004 | -2.128769142 | 9.596059619 | -13.02179622 | 6.43E-06 | 0.002339578 | 4.680806534 | down |
| hsa_circ_0006903 | -2.112513675 | 6.984960591 | -11.36211901 | 1.52E-05 | 0.003467305 | 3.864922249 | down |
| hsa_circ_0046419 | -2.093781539 | 12.12147248 | -10.0200184 | 3.31E-05 | 0.005591173 | 3.092975481 | down |
| hsa_circ_0021647 | -2.088687225 | 12.03409898 | -4.541928957 | 0.003162915 | 0.057847574 | -1.703783251 | down |
| hsa_circ_0082711 | -2.087748775 | 7.577019515 | -9.418921038 | 4.85E-05 | 0.006548796 | 2.708551692 | down |
| hsa_circ_0088200 | -2.080784174 | 7.007063395 | -13.56638905 | 4.96E-06 | 0.002196312 | 4.920202979 | down |
| hsa_circ_0050263 | -2.079687664 | 8.644426115 | -9.148974675 | 5.80E-05 | 0.007115831 | 2.527203809 | down |
| hsa_circ_0091419 | -2.026426581 | 10.21629611 | -7.067748255 | 0.000273042 | 0.014890448 | 0.916067427 | down |
| hsa_circ_0017412 | -1.986665921 | 10.12846471 | -12.22215088 | 9.59E-06 | 0.002653984 | 4.304927615 | down |
| hsa_circ_0090650 | -1.984611133 | 9.560631631 | -10.56398134 | 2.39E-05 | 0.004226287 | 3.419413055 | down |
| hsa_circ_0043278 | -1.975130795 | 12.85679477 | -3.960002003 | 0.006266398 | 0.085653116 | -2.437455548 | down |
| hsa_circ_0005178 | -1.974119697 | 8.761072469 | -7.724887556 | 0.000161322 | 0.011932688 | 1.469411289 | down |
| hsa_circ_0065793 | -1.933916924 | 6.815194165 | -7.350365745 | 0.000216727 | 0.013975564 | 1.159609425 | down |
| hsa_circ_0045788 | -1.926457461 | 11.13043037 | -12.0500188 | 1.05E-05 | 0.002829219 | 4.219959869 | down |
| hsa_circ_0079972 | -1.906108462 | 11.23104572 | -12.60537403 | 7.89E-06 | 0.002516494 | 4.488837318 | down |
| hsa_circ_0006220 | -1.896600995 | 12.77520143 | -3.738527586 | 0.008238728 | 0.09906657 | -2.730058051 | down |
| hsa_circ_0007167 | -1.896386469 | 11.50758493 | -11.72301342 | 1.25E-05 | 0.003082461 | 4.054345845 | down |
| hsa_circ_0082326 | -1.895222939 | 12.30104617 | -8.313963816 | 0.000103773 | 0.009549272 | 1.928840363 | down |
| hsa_circ_0000423 | -1.893899885 | 9.067842158 | -7.909544631 | 0.000140072 | 0.011040106 | 1.616979005 | down |
| hsa_circ_0055864 | -1.849583494 | 6.585389205 | -12.33294507 | 9.06E-06 | 0.002642879 | 4.358833953 | down |
| hsa_circ_0005932 | -1.842681003 | 8.01687649 | -13.50664347 | 5.10E-06 | 0.002196312 | 4.89455982 | down |
| hsa_circ_0005037 | -1.840365018 | 7.517037073 | -12.65477859 | 7.70E-06 | 0.002516494 | 4.512033052 | down |
| hsa_circ_0058695 | -1.825743818 | 7.916124637 | -6.988914428 | 0.000291598 | 0.015394812 | 0.846573268 | down |
| hsa_circ_0001993 | -1.809255249 | 7.466311023 | -4.860001798 | 0.002222821 | 0.046964764 | -1.324630541 | down |
| hsa_circ_0023110 | -1.804070788 | 6.158965993 | -9.511851278 | 4.57E-05 | 0.006548796 | 2.769699563 | down |
| hsa_circ_0061251 | -1.792844158 | 6.642853532 | -3.324485827 | 0.01401741 | 0.129478177 | -3.295410133 | down |
| hsa_circ_0074944 | -1.789986822 | 11.9529313 | -9.33783355 | 5.12E-05 | 0.006656678 | 2.654665248 | down |
| hsa_circ_0038844 | -1.749165473 | 11.27993202 | -11.3315771 | 1.54E-05 | 0.003467305 | 3.848560607 | down |
| hsa_circ_0006606 | -1.747508222 | 12.27347262 | -7.25053424 | 0.000234957 | 0.014150813 | 1.074565574 | down |
| hsa_circ_0051640 | -1.715669939 | 8.64287124 | -9.237669069 | 5.47E-05 | 0.006784732 | 2.587408026 | down |
| hsa_circ_0030428 | -1.712323531 | 10.48792057 | -10.96786424 | 1.89E-05 | 0.003779077 | 3.649599498 | down |
| hsa_circ_0079262 | -1.697700044 | 5.870435305 | -6.538534437 | 0.000429498 | 0.019115055 | 0.435902311 | down |
| hsa_circ_0071824 | -1.695734596 | 5.929506621 | -6.123511404 | 0.000625184 | 0.024100553 | 0.035818238 | down |
| hsa_circ_0005801 | -1.679936083 | 7.959031063 | -10.62186839 | 2.31E-05 | 0.00420566 | 3.453023487 | down |
| hsa_circ_0000779 | -1.676599587 | 8.441991223 | -11.6198429 | 1.32E-05 | 0.003159871 | 4.000920706 | down |
| hsa_circ_0074535 | -1.663628429 | 6.730572618 | -10.86836847 | 2.00E-05 | 0.003857265 | 3.593817703 | down |
| hsa_circ_0025016 | -1.656088961 | 9.127308789 | -4.238284132 | 0.004490329 | 0.069365633 | -2.080164764 | down |
| hsa_circ_0077216 | -1.65596216 | 9.563746684 | -11.03978924 | 1.81E-05 | 0.003763446 | 3.689556309 | down |
| hsa_circ_0004036 | -1.637929526 | 7.577918257 | -9.658892909 | 4.16E-05 | 0.006548796 | 2.865146683 | down |
| hsa_circ_0007051 | -1.635225731 | 6.141614641 | -7.346295908 | 0.000217438 | 0.013975564 | 1.156163144 | down |
| hsa_circ_0002643 | -1.634768487 | 8.085071838 | -8.294672078 | 0.000105238 | 0.009549272 | 1.914306161 | down |
| hsa_circ_0008802 | -1.632237923 | 8.148704732 | -8.601063847 | 8.45E-05 | 0.008772718 | 2.141237063 | down |
| hsa_circ_0067013 | -1.62565531 | 7.033591912 | -8.928482836 | 6.73E-05 | 0.007650989 | 2.374839149 | down |
| hsa_circ_0087192 | -1.622274314 | 6.139512459 | -8.498469599 | 9.09E-05 | 0.009034752 | 2.066168067 | down |
| hsa_circ_0000930 | -1.6183906 | 11.0726945 | -11.80300165 | 1.19E-05 | 0.003069078 | 4.095374494 | down |
| hsa_circ_0005114 | -1.596665039 | 6.598254458 | -9.080999921 | 6.07E-05 | 0.007202398 | 2.480645592 | down |
| hsa_circ_0064644 | -1.596114522 | 8.853950021 | -3.514249826 | 0.010952209 | 0.11437326 | -3.033476583 | down |
| hsa_circ_0011631 | -1.593646067 | 7.234177184 | -11.20557912 | 1.65E-05 | 0.003642622 | 3.780502403 | down |
| hsa_circ_0051239 | -1.590375494 | 9.973057119 | -2.743762818 | 0.030771738 | 0.189734971 | -4.120726474 | down |
| hsa_circ_0006578 | -1.583376331 | 8.914395681 | -9.723180147 | 3.99E-05 | 0.006528057 | 2.906381689 | down |
| hsa_circ_0000977 | -1.578346781 | 8.700204036 | -7.578982205 | 0.000180728 | 0.012734077 | 1.350423401 | down |
| hsa_circ_0025705 | -1.574312338 | 7.242263994 | -11.00806742 | 1.85E-05 | 0.003763446 | 3.67197151 | down |
| hsa_circ_0000352 | -1.566727069 | 8.045158882 | -6.454594401 | 0.000462692 | 0.019825983 | 0.356707343 | down |
| hsa_circ_0059283 | -1.559748345 | 7.898745531 | -5.170982446 | 0.001596112 | 0.039081223 | -0.968655023 | down |
| hsa_circ_0020068 | -1.556609546 | 7.445226382 | -8.06276757 | 0.000124839 | 0.010212217 | 1.736930491 | down |
| hsa_circ_0089652 | -1.549229758 | 10.15154022 | -7.39886178 | 0.000208455 | 0.013818525 | 1.200540862 | down |
| hsa_circ_0056731 | -1.533635639 | 7.931994546 | -5.902469471 | 0.000769541 | 0.026146933 | -0.186242002 | down |
| hsa_circ_0000254 | -1.528524858 | 9.016052768 | -8.959682726 | 6.59E-05 | 0.007569544 | 2.396636223 | down |
| hsa_circ_0004667 | -1.513961272 | 6.546355301 | -9.299500505 | 5.25E-05 | 0.006716187 | 2.629016916 | down |
| hsa_circ_0061817 | -1.509278692 | 8.182735042 | -5.555554068 | 0.001078639 | 0.031997658 | -0.547965917 | down |
| hsa_circ_0041100 | -1.505654316 | 12.02129129 | -8.381374027 | 9.88E-05 | 0.009279769 | 1.97936419 | down |
| hsa_circ_0008794 | -1.503111237 | 8.258005497 | -7.107907166 | 0.000264108 | 0.014592877 | 0.951203442 | down |
| hsa_circ_0024144 | -1.500895373 | 10.11133329 | -7.362413663 | 0.000214638 | 0.013961797 | 1.169801181 | down |
| hsa_circ_0024162 | -1.496163265 | 7.19838077 | -4.30134259 | 0.004170461 | 0.066517931 | -2.000838873 | down |
| hsa_circ_0057328 | -1.493550742 | 7.557425734 | -8.049078694 | 0.00012612 | 0.010239453 | 1.726304511 | down |
| hsa_circ_0001595 | -1.490890133 | 7.393193537 | -10.23232016 | 2.91E-05 | 0.005068857 | 3.222704796 | down |
| hsa_circ_0072568 | -1.487061511 | 8.043333917 | -6.199687792 | 0.000582735 | 0.023219097 | 0.110875077 | down |
| hsa_circ_0051470 | -1.485682514 | 8.795297558 | -6.565818429 | 0.000419296 | 0.018943763 | 0.461460137 | down |
| hsa_circ_0042265 | -1.481777177 | 10.19846873 | -8.559261851 | 8.70E-05 | 0.008949825 | 2.110760199 | down |
| hsa_circ_0005983 | -1.476131284 | 6.251500545 | -7.265952932 | 0.000232031 | 0.014150813 | 1.087769815 | down |
| hsa_circ_0007548 | -1.475173005 | 11.79581099 | -9.970784894 | 3.42E-05 | 0.005675406 | 3.06245275 | down |
| hsa_circ_0089414 | -1.474858635 | 5.902888827 | -9.415494193 | 4.86E-05 | 0.006548796 | 2.70628446 | down |
| hsa_circ_0000480 | -1.471914259 | 12.58079417 | -8.773261598 | 7.49E-05 | 0.008253203 | 2.265211285 | down |
| hsa_circ_0022920 | -1.458119838 | 9.066192162 | -6.844170855 | 0.000329522 | 0.016705046 | 0.717155834 | down |
| hsa_circ_0044097 | -1.457706198 | 14.49660271 | -7.11510847 | 0.000262541 | 0.014592877 | 0.957485247 | down |
| hsa_circ_0089172 | -1.453023327 | 9.101771209 | -5.298816554 | 0.001398205 | 0.036556462 | -0.826457617 | down |
| hsa_circ_0020976 | -1.449471154 | 6.907557229 | -9.012133603 | 6.36E-05 | 0.007383083 | 2.433102241 | down |
| hsa_circ_0006333 | -1.446812735 | 6.317447461 | -9.400007488 | 4.91E-05 | 0.006548796 | 2.696027268 | down |
| hsa_circ_0001713 | -1.444230637 | 5.473793999 | -8.451447667 | 9.40E-05 | 0.009202849 | 2.031455503 | down |
| hsa_circ_0050834 | -1.440985066 | 11.24519987 | -9.443807576 | 4.77E-05 | 0.006548796 | 2.724990352 | down |
| hsa_circ_0022015 | -1.439072402 | 7.05287532 | -9.412770934 | 4.87E-05 | 0.006548796 | 2.704482095 | down |
| hsa_circ_0025054 | -1.430025404 | 6.654434125 | -5.935536792 | 0.000745725 | 0.025975303 | -0.152613254 | down |
| hsa_circ_0028173 | -1.426798994 | 10.34956481 | -7.578569839 | 0.000180786 | 0.012734077 | 1.350084067 | down |
| hsa_circ_0041506 | -1.412842371 | 12.82586975 | -7.727273269 | 0.000161025 | 0.011932688 | 1.471339175 | down |
| hsa_circ_0002076 | -1.411647246 | 6.405434343 | -8.881616848 | 6.95E-05 | 0.007818217 | 2.34194822 | down |
| hsa_circ_0076995 | -1.402558344 | 9.988278624 | -8.094102182 | 0.000121962 | 0.010130333 | 1.761187839 | down |
| hsa_circ_0082708 | -1.399918766 | 9.125857629 | -7.539259233 | 0.000186462 | 0.012906551 | 1.317656025 | down |
| hsa_circ_0023990 | -1.391703219 | 8.434109912 | -5.51330107 | 0.001125055 | 0.032279385 | -0.593157084 | down |
| hsa_circ_0000063 | -1.390207 | 6.243013039 | -9.468742587 | 4.70E-05 | 0.006548796 | 2.741414429 | down |
| hsa_circ_0004066 | -1.389163156 | 7.370606081 | -5.496540847 | 0.001144086 | 0.032682112 | -0.611152262 | down |
| hsa_circ_0043247 | -1.379575006 | 7.412353056 | -6.859322285 | 0.0003253 | 0.016637672 | 0.730814785 | down |
| hsa_circ_0005008 | -1.379107316 | 8.614331995 | -4.59369712 | 0.002983508 | 0.05573689 | -1.641023721 | down |
| hsa_circ_0005795 | -1.367974334 | 6.499306206 | -6.056999924 | 0.000665122 | 0.024511896 | -0.030327296 | down |
| hsa_circ_0002938 | -1.363850287 | 5.991294173 | -7.789824377 | 0.000153456 | 0.011695375 | 1.521685687 | down |
| hsa_circ_0065049 | -1.360722207 | 8.899560541 | -6.98616499 | 0.00029227 | 0.015394812 | 0.844137033 | down |
| hsa_circ_0001655 | -1.359895946 | 10.80291339 | -7.44353023 | 0.000201153 | 0.01357532 | 1.238023651 | down |
| hsa_circ_0011588 | -1.355834053 | 7.433935316 | -7.789902255 | 0.000153447 | 0.011695375 | 1.52174813 | down |
| hsa_circ_0007283 | -1.354250383 | 8.016350814 | -8.442176574 | 9.46E-05 | 0.009202849 | 2.024588473 | down |
| hsa_circ_0003898 | -1.350381092 | 6.436748771 | -9.487797546 | 4.64E-05 | 0.006548796 | 2.753934131 | down |
| hsa_circ_0083234 | -1.349986459 | 7.80323079 | -9.081023143 | 6.07E-05 | 0.007202398 | 2.48066156 | down |
| hsa_circ_0011279 | -1.349360921 | 9.597614457 | -6.086132265 | 0.000647284 | 0.024353227 | -0.001284662 | down |
| hsa_circ_0034067 | -1.34729164 | 7.807535298 | -9.656113738 | 4.16E-05 | 0.006548796 | 2.863357334 | down |
| hsa_circ_0000060 | -1.345986191 | 6.74180563 | -4.871783691 | 0.002194571 | 0.046623663 | -1.310880769 | down |
| hsa_circ_0037858 | -1.338453714 | 6.239207955 | -8.506647094 | 9.03E-05 | 0.009034752 | 2.072185112 | down |
| hsa_circ_0022567 | -1.337351612 | 8.850496677 | -6.821135306 | 0.000336059 | 0.016799858 | 0.696338822 | down |
| hsa_circ_0023736 | -1.336949306 | 8.750670228 | -4.821690758 | 0.002317527 | 0.047848129 | -1.369485155 | down |
| hsa_circ_0008946 | -1.336672618 | 6.570710687 | -8.643715498 | 8.20E-05 | 0.008680109 | 2.172178732 | down |
| hsa_circ_0013626 | -1.331309508 | 6.430553289 | -4.64840621 | 0.002806138 | 0.053544237 | -1.575144044 | down |
| hsa_circ_0087893 | -1.330568714 | 5.997643745 | -6.595789833 | 0.000408405 | 0.018836708 | 0.489432192 | down |
| hsa_circ_0003057 | -1.327039315 | 7.839790214 | -4.929096763 | 0.002062758 | 0.045271673 | -1.244292621 | down |
| hsa_circ_0005575 | -1.323953525 | 7.342038464 | -9.550440104 | 4.46E-05 | 0.006548796 | 2.794902024 | down |
| hsa_circ_0007422 | -1.322403317 | 5.911854881 | -7.234085164 | 0.000238125 | 0.014150813 | 1.060450777 | down |
| hsa_circ_0075263 | -1.321521595 | 6.804388793 | -5.843955384 | 0.000813817 | 0.027038759 | -0.246107138 | down |
| hsa_circ_0003270 | -1.317036472 | 8.781663874 | -4.541875154 | 0.003163108 | 0.057847574 | -1.703848692 | down |
| hsa_circ_0021569 | -1.307075427 | 10.47966535 | -9.380769137 | 4.97E-05 | 0.006550812 | 2.683260039 | down |
| hsa_circ_0001946 | -1.306086339 | 6.876134271 | -5.733967348 | 0.000905047 | 0.02837479 | -0.35988349 | down |
| hsa_circ_0000781 | -1.305881819 | 5.955365886 | -7.196011463 | 0.000245646 | 0.014260668 | 1.027668156 | down |
| hsa_circ_0047713 | -1.305473697 | 10.61362853 | -5.900475706 | 0.000771004 | 0.026146933 | -0.188274269 | down |
| hsa_circ_0046507 | -1.305314902 | 7.484028 | -8.209403221 | 0.000112006 | 0.009832868 | 1.849661458 | down |
| hsa_circ_0004878 | -1.303309543 | 6.138556236 | -8.513991321 | 8.99E-05 | 0.009034752 | 2.077584063 | down |
| hsa_circ_0024446 | -1.30059637 | 5.83437328 | -8.300992553 | 0.000104756 | 0.009549272 | 1.91907164 | down |
| hsa_circ_0002829 | -1.299529579 | 6.291874514 | -6.525121641 | 0.000434616 | 0.019115055 | 0.423305157 | down |
| hsa_circ_0072816 | -1.297650898 | 5.34552905 | -4.646666821 | 0.002811593 | 0.053544237 | -1.577231552 | down |
| hsa_circ_0000298 | -1.287951276 | 11.98989681 | -9.056846775 | 6.17E-05 | 0.007241038 | 2.464014072 | down |
| hsa_circ_0011883 | -1.282393852 | 5.580720211 | -6.73823378 | 0.000360836 | 0.017426552 | 0.620913317 | down |
| hsa_circ_0065932 | -1.278144884 | 12.41685422 | -6.671340707 | 0.000382344 | 0.018028626 | 0.559467336 | down |
| hsa_circ_0004673 | -1.277252424 | 8.411775698 | -4.501718566 | 0.00331057 | 0.058968606 | -1.752814148 | down |
| hsa_circ_0084106 | -1.275544141 | 6.157236977 | -6.287307275 | 0.000537888 | 0.021974824 | 0.19629289 | down |
| hsa_circ_0060456 | -1.271407675 | 8.278685032 | -4.745531715 | 0.00251949 | 0.050567753 | -1.459311251 | down |
| hsa_circ_0007868 | -1.265697223 | 5.978496424 | -7.01494382 | 0.000285317 | 0.015394812 | 0.869595542 | down |
| hsa_circ_0023988 | -1.264671885 | 8.764160495 | -4.649472056 | 0.002802802 | 0.053544237 | -1.573865109 | down |
| hsa_circ_0008913 | -1.259847528 | 8.44209098 | -3.86660753 | 0.007026476 | 0.090539252 | -2.559969173 | down |
| hsa_circ_0083026 | -1.256269754 | 6.137204772 | -3.28945035 | 0.014679255 | 0.131214072 | -3.344255335 | down |
| hsa_circ_0052130 | -1.245392314 | 7.378858015 | -6.070932391 | 0.000656523 | 0.024361279 | -0.016423969 | down |
| hsa_circ_0062980 | -1.2389376 | 10.3163315 | -6.391690085 | 0.000489476 | 0.020645955 | 0.296794188 | down |
| hsa_circ_0091692 | -1.234229276 | 9.176230876 | -4.402652256 | 0.003708175 | 0.063355806 | -1.874668815 | down |
| hsa_circ_0065656 | -1.233568856 | 6.928475253 | -7.596130618 | 0.000178315 | 0.012734077 | 1.364519431 | down |
| hsa_circ_0005389 | -1.232363409 | 11.2237494 | -6.176055582 | 0.000595545 | 0.02342126 | 0.087669716 | down |
| hsa_circ_0015081 | -1.231987711 | 7.16626861 | -5.966564125 | 0.000724134 | 0.02589138 | -0.121191035 | down |
| hsa_circ_0001222 | -1.230030018 | 7.701798535 | -4.824787189 | 0.002309707 | 0.047778195 | -1.365851622 | down |
| hsa_circ_0092353 | -1.22932381 | 7.907332872 | -6.073922202 | 0.000654694 | 0.024361279 | -0.013443701 | down |
| hsa_circ_0000993 | -1.229125844 | 6.827276833 | -4.186290096 | 0.004774585 | 0.072140057 | -2.14602878 | down |
| hsa_circ_0001991 | -1.225122334 | 6.269491559 | -6.189355013 | 0.000588297 | 0.023354542 | 0.100737702 | down |
| hsa_circ_0001240 | -1.224048587 | 6.563634279 | -5.463953143 | 0.001182134 | 0.033241373 | -0.646254577 | down |
| hsa_circ_0022812 | -1.222857996 | 6.967369542 | -6.474060705 | 0.000454743 | 0.019720124 | 0.37514963 | down |
| hsa_circ_0079373 | -1.214514545 | 6.294282949 | -8.223439549 | 0.000110859 | 0.009811907 | 1.860348322 | down |
| hsa_circ_0080646 | -1.207955713 | 7.791277033 | -5.942711105 | 0.000740669 | 0.025975303 | -0.145336305 | down |
| hsa_circ_0000858 | -1.207870058 | 5.795510641 | -4.387724509 | 0.003772567 | 0.063933873 | -1.893160863 | down |
| hsa_circ_0007482 | -1.20756902 | 5.984300436 | -8.737917936 | 7.68E-05 | 0.008323557 | 2.239969761 | down |
| hsa_circ_0038539 | -1.206174818 | 5.289491626 | -6.175950355 | 0.000595603 | 0.02342126 | 0.08756623 | down |
| hsa_circ_0004555 | -1.20484912 | 6.48810582 | -3.167574183 | 0.017258259 | 0.142364155 | -3.515261926 | down |
| hsa_circ_0002053 | -1.202485625 | 7.326686645 | -4.817884571 | 0.00232718 | 0.047864545 | -1.373953542 | down |
| hsa_circ_0004069 | -1.201361112 | 9.134687432 | -8.253984722 | 0.000108408 | 0.009674272 | 1.883542405 | down |
| hsa_circ_0001871 | -1.201357432 | 7.826927794 | -2.944629444 | 0.023328093 | 0.167040284 | -3.831986466 | down |
| hsa_circ_0030131 | -1.200982382 | 6.098748252 | -6.591485907 | 0.000409949 | 0.018836708 | 0.485421997 | down |
| hsa_circ_0057552 | -1.199903746 | 6.660643991 | -3.324588366 | 0.014015521 | 0.129478177 | -3.29526739 | down |
| hsa_circ_0015003 | -1.198890596 | 5.55199385 | -6.994949014 | 0.000290128 | 0.015394812 | 0.851917448 | down |
| hsa_circ_0002292 | -1.197039654 | 5.120034308 | -5.134496937 | 0.00165823 | 0.040057201 | -1.009677636 | down |
| hsa_circ_0002032 | -1.195823383 | 7.426229709 | -4.989533873 | 0.001933277 | 0.043948466 | -1.174607984 | down |
| hsa_circ_0001877 | -1.193747846 | 10.12083575 | -5.11139607 | 0.001698961 | 0.040677109 | -1.035752325 | down |
| hsa_circ_0001208 | -1.190454641 | 11.43706257 | -7.553215183 | 0.000184424 | 0.012847842 | 1.329186604 | down |
| hsa_circ_0028602 | -1.188970282 | 7.864026409 | -5.58433823 | 0.001048255 | 0.031529393 | -0.517323289 | down |
| hsa_circ_0074623 | -1.187868552 | 7.794267538 | -7.786895882 | 0.000153801 | 0.011695375 | 1.519337185 | down |
| hsa_circ_0000518 | -1.187258745 | 7.320342339 | -3.368072377 | 0.013238822 | 0.125694298 | -3.234848433 | down |
| hsa_circ_0000966 | -1.186839343 | 6.111812708 | -6.754568264 | 0.000355794 | 0.017424445 | 0.635837989 | down |
| hsa_circ_0033572 | -1.18561067 | 9.181124401 | -6.762122383 | 0.00035349 | 0.017424445 | 0.642729593 | down |
| hsa_circ_0004656 | -1.183275494 | 5.174511036 | -8.411671006 | 9.67E-05 | 0.009268656 | 2.00193969 | down |
| hsa_circ_0044684 | -1.178094166 | 5.960193183 | -7.944898967 | 0.000136377 | 0.010908166 | 1.644854806 | down |
| hsa_circ_0028711 | -1.175159917 | 5.463016043 | -5.953277288 | 0.000733292 | 0.025975303 | -0.134631379 | down |
| hsa_circ_0016545 | -1.174002594 | 5.470048713 | -2.934698295 | 0.023646968 | 0.167412406 | -3.846197045 | down |
| hsa_circ_0006352 | -1.173949138 | 7.324312738 | -5.941560407 | 0.000741477 | 0.025975303 | -0.146503005 | down |
| hsa_circ_0038799 | -1.169397859 | 5.874606006 | -6.315971485 | 0.000524075 | 0.02166154 | 0.224026683 | down |
| hsa_circ_0008349 | -1.166862847 | 8.744497142 | -6.445344553 | 0.000466524 | 0.019911185 | 0.347927829 | down |
| hsa_circ_0007008 | -1.165622588 | 7.624530229 | -6.927782358 | 0.000306976 | 0.016090888 | 0.79220416 | down |
| hsa_circ_0033163 | -1.161915554 | 12.34496275 | -5.900350726 | 0.000771096 | 0.026146933 | -0.188401681 | down |
| hsa_circ_0004070 | -1.161245483 | 5.528469449 | -6.52509624 | 0.000434626 | 0.019115055 | 0.423281279 | down |
| hsa_circ_0016459 | -1.161096498 | 8.847024352 | -5.974774604 | 0.000718539 | 0.02577669 | -0.112897353 | down |
| hsa_circ_0077527 | -1.160918348 | 11.34278631 | -8.153471305 | 0.000116715 | 0.009957516 | 1.806896868 | down |
| hsa_circ_0018225 | -1.159727016 | 6.396863907 | -6.150931619 | 0.000609514 | 0.023760043 | 0.062921201 | down |
| hsa_circ_0027719 | -1.159360943 | 8.770018733 | -3.528815261 | 0.010749098 | 0.113348401 | -3.013563184 | down |
| hsa_circ_0067260 | -1.156965571 | 11.29215602 | -8.38714351 | 9.84E-05 | 0.009279769 | 1.983669551 | down |
| hsa_circ_0000725 | -1.1452015 | 8.499997272 | -4.299175526 | 0.004181025 | 0.066588061 | -2.00355489 | down |
| hsa_circ_0000772 | -1.143379398 | 6.447320222 | -6.127390386 | 0.00062294 | 0.024100553 | 0.039658219 | down |
| hsa_circ_0001443 | -1.142692097 | 7.056860777 | -8.367122537 | 9.99E-05 | 0.009294905 | 1.968716596 | down |
| hsa_circ_0045355 | -1.140043693 | 12.64759379 | -7.131250248 | 0.000259067 | 0.014494336 | 0.971545271 | down |
| hsa_circ_0074101 | -1.139731147 | 6.142980218 | -7.913575414 | 0.000139645 | 0.011040106 | 1.620163216 | down |
| hsa_circ_0052131 | -1.139433762 | 7.672200598 | -3.70761471 | 0.008564571 | 0.101626635 | -2.771463294 | down |
| hsa_circ_0002720 | -1.138620901 | 5.964397647 | -6.633978424 | 0.000394989 | 0.01846358 | 0.524917603 | down |
| hsa_circ_0001734 | -1.137561599 | 6.414213035 | -5.729284609 | 0.00090918 | 0.02837479 | -0.364763998 | down |
| hsa_circ_0005630 | -1.136090976 | 5.831651081 | -6.258079474 | 0.000552399 | 0.022256735 | 0.167907441 | down |
| hsa_circ_0007064 | -1.135704527 | 7.122775842 | -7.422865601 | 0.000204495 | 0.013715105 | 1.220709162 | down |
| hsa_circ_0003140 | -1.135067506 | 5.30829635 | -6.522877665 | 0.000435479 | 0.019115055 | 0.421195513 | down |
| hsa_circ_0079988 | -1.134905367 | 6.214574045 | -5.563226775 | 0.001070444 | 0.03195592 | -0.539786505 | down |
| hsa_circ_0005741 | -1.133856383 | 6.617976371 | -6.375906782 | 0.000496469 | 0.02085944 | 0.281684802 | down |
| hsa_circ_0008160 | -1.132893778 | 7.403779968 | -7.225375529 | 0.000239822 | 0.014150813 | 1.052965325 | down |
| hsa_circ_0022767 | -1.132039597 | 7.187789435 | -3.924308138 | 0.006545638 | 0.088571171 | -2.484125897 | down |
| hsa_circ_0009020 | -1.131520403 | 5.602286125 | -6.832838346 | 0.00033272 | 0.016710268 | 0.706922385 | down |
| hsa_circ_0000517 | -1.129217804 | 7.782006473 | -3.348223854 | 0.013587397 | 0.127072647 | -3.262398573 | down |
| hsa_circ_0036766 | -1.127759174 | 6.27665563 | -6.030219967 | 0.00068201 | 0.024904977 | -0.057122296 | down |
| hsa_circ_0033191 | -1.120190964 | 7.990637001 | -4.510645289 | 0.003277139 | 0.058665398 | -1.741907882 | down |
| hsa_circ_0045308 | -1.118057499 | 12.04115494 | -7.318416938 | 0.00022238 | 0.014150813 | 1.132508477 | down |
| hsa_circ_0080251 | -1.115505176 | 10.16456338 | -7.248098065 | 0.000235423 | 0.014150813 | 1.07247695 | down |
| hsa_circ_0002628 | -1.114608272 | 7.489463563 | -7.450314511 | 0.00020007 | 0.01357532 | 1.243698375 | down |
| hsa_circ_0032210 | -1.11182657 | 6.865775588 | -8.148842083 | 0.000117115 | 0.009957516 | 1.803344524 | down |
| hsa_circ_0009012 | -1.111544484 | 12.38716709 | -2.761236699 | 0.030033606 | 0.187566732 | -4.095512734 | down |
| hsa_circ_0003986 | -1.110614947 | 5.530571436 | -7.459939259 | 0.000198544 | 0.01356885 | 1.251740809 | down |
| hsa_circ_0006015 | -1.109750124 | 6.446999175 | -4.392854774 | 0.003750298 | 0.063772779 | -1.886801791 | down |
| hsa_circ_0085711 | -1.108160496 | 6.015068753 | -6.626853549 | 0.000397453 | 0.018498708 | 0.518310256 | down |
| hsa_circ_0000894 | -1.108061692 | 9.930822339 | -4.42342545 | 0.003620591 | 0.062055777 | -1.848992458 | down |
| hsa_circ_0007520 | -1.106148059 | 9.360174174 | -4.215743373 | 0.004611192 | 0.070626461 | -2.10866788 | down |
| hsa_circ_0006956 | -1.106006367 | 10.88231237 | -2.95872306 | 0.022883427 | 0.165861363 | -3.811833199 | down |
| hsa_circ_0051641 | -1.103192788 | 9.697196921 | -5.361024124 | 0.001311985 | 0.035066378 | -0.758116237 | down |
| hsa_circ_0077526 | -1.103054494 | 11.32963093 | -5.823020597 | 0.000830351 | 0.027269732 | -0.267636887 | down |
| hsa_circ_0005235 | -1.099841136 | 8.381482566 | -6.100039136 | 0.00063896 | 0.024304244 | 0.012540545 | down |
| hsa_circ_0083377 | -1.094673302 | 7.150209116 | -4.49448172 | 0.00333795 | 0.059145668 | -1.761664762 | down |
| hsa_circ_0003600 | -1.094232248 | 9.723370072 | -5.303509438 | 0.001391483 | 0.036469022 | -0.821282565 | down |
| hsa_circ_0000255 | -1.093511102 | 6.441176576 | -6.284728915 | 0.000539151 | 0.021974824 | 0.193793164 | down |
| hsa_circ_0044235 | -1.089677376 | 5.75008637 | -5.937250874 | 0.000744514 | 0.025975303 | -0.15087403 | down |
| hsa_circ_0008496 | -1.089486274 | 8.252996122 | -6.348308095 | 0.000508971 | 0.021219573 | 0.255190269 | down |
| hsa_circ_0000037 | -1.087724238 | 6.965160255 | -4.399986801 | 0.003719582 | 0.063398542 | -1.877968196 | down |
| hsa_circ_0081199 | -1.086517641 | 5.965352161 | -5.234963856 | 0.001493384 | 0.037942492 | -0.897187597 | down |
| hsa_circ_0091074 | -1.084094949 | 6.420864451 | -5.199849241 | 0.001548813 | 0.038534751 | -0.936336735 | down |
| hsa_circ_0090160 | -1.083346804 | 6.837656274 | -4.941043159 | 0.002036413 | 0.044967662 | -1.230474984 | down |
| hsa_circ_0039318 | -1.082004824 | 7.118860356 | -4.966284934 | 0.001981977 | 0.044201798 | -1.20134966 | down |
| hsa_circ_0092303 | -1.080786892 | 11.61278846 | -4.807640733 | 0.002353383 | 0.048058495 | -1.385990475 | down |
| hsa_circ_0078352 | -1.080522553 | 5.89319664 | -4.282375915 | 0.004263931 | 0.067080435 | -2.024634499 | down |
| hsa_circ_0056558 | -1.077638147 | 6.675257592 | -6.729813655 | 0.000363466 | 0.017426552 | 0.613207743 | down |
| hsa_circ_0072665 | -1.077498268 | 7.2420834 | -4.014930647 | 0.005861992 | 0.082418993 | -2.366006439 | down |
| hsa_circ_0064001 | -1.074372258 | 7.642046797 | -5.381838085 | 0.001284484 | 0.034761551 | -0.735374043 | down |
| hsa_circ_0008587 | -1.074226122 | 11.62500485 | -7.23330944 | 0.000238276 | 0.014150813 | 1.059784416 | down |
| hsa_circ_0006949 | -1.073340345 | 5.317040755 | -4.539065987 | 0.003173182 | 0.057847574 | -1.707266052 | down |
| hsa_circ_0048234 | -1.073319809 | 7.357972416 | -5.353962279 | 0.001321466 | 0.035145784 | -0.765846404 | down |
| hsa_circ_0020460 | -1.072861762 | 5.781724394 | -6.071131542 | 0.000656401 | 0.024361279 | -0.016225417 | down |
| hsa_circ_0026978 | -1.071387489 | 7.387284296 | -7.227030076 | 0.000239499 | 0.014150813 | 1.054387946 | down |
| hsa_circ_0011938 | -1.070786921 | 6.077607503 | -7.606232891 | 0.00017691 | 0.012734077 | 1.372809556 | down |
| hsa_circ_0003712 | -1.066851288 | 5.413956651 | -5.181965219 | 0.001577928 | 0.038889369 | -0.956344717 | down |
| hsa_circ_0070098 | -1.066070926 | 5.853323087 | -4.30971376 | 0.004129932 | 0.066263008 | -1.990353902 | down |
| hsa_circ_0079929 | -1.064505732 | 10.53808594 | -4.876796353 | 0.002182674 | 0.046623663 | -1.305037201 | down |
| hsa_circ_0078297 | -1.063366764 | 6.140172169 | -7.061454506 | 0.000274473 | 0.014893275 | 0.910544714 | down |
| hsa_circ_0004496 | -1.062946694 | 9.243327071 | -3.629948679 | 0.009447268 | 0.106843877 | -2.87608438 | down |
| hsa_circ_0085129 | -1.061151459 | 6.88928965 | -7.574513451 | 0.000181363 | 0.012734077 | 1.346745168 | down |
| hsa_circ_0034953 | -1.059645881 | 8.86130738 | -4.573943266 | 0.003050594 | 0.056695893 | -1.664923322 | down |
| hsa_circ_0083390 | -1.056699198 | 6.298219739 | -6.339629467 | 0.000512976 | 0.021304274 | 0.246839272 | down |
| hsa_circ_0001874 | -1.055500765 | 6.886890551 | -3.813434959 | 0.007504163 | 0.094661162 | -2.630293203 | down |
| hsa_circ_0055983 | -1.055102121 | 8.586172042 | -3.255211233 | 0.015358862 | 0.133615518 | -3.392128646 | down |
| hsa_circ_0008716 | -1.055090889 | 5.321582176 | -6.729266048 | 0.000363638 | 0.017426552 | 0.61270632 | down |
| hsa_circ_0058060 | -1.053448378 | 6.146760613 | -7.104362399 | 0.000264883 | 0.014592877 | 0.948109194 | down |
| hsa_circ_0015004 | -1.053415156 | 11.17076612 | -6.996587452 | 0.00028973 | 0.015394812 | 0.853367731 | down |
| hsa_circ_0003738 | -1.052044504 | 13.29004706 | -7.375386782 | 0.000212414 | 0.013936563 | 1.180758485 | down |
| hsa_circ_0024766 | -1.05142825 | 8.372465503 | -4.936855861 | 0.002045604 | 0.045078433 | -1.235315733 | down |
| hsa_circ_0073270 | -1.048884476 | 8.22250039 | -6.834353421 | 0.00033229 | 0.016710268 | 0.70829138 | down |
| hsa_circ_0004745 | -1.048677242 | 11.89005669 | -7.213066208 | 0.000242244 | 0.014216041 | 1.042372183 | down |
| hsa_circ_0040705 | -1.048391113 | 5.475009275 | -3.373388884 | 0.013147111 | 0.125519455 | -3.227477208 | down |
| hsa_circ_0034642 | -1.045751253 | 9.116116664 | -6.016171986 | 0.000691063 | 0.025060806 | -0.071215649 | down |
| hsa_circ_0073009 | -1.043169524 | 10.55587155 | -6.116251563 | 0.000629409 | 0.024100553 | 0.028626179 | down |
| hsa_circ_0002414 | -1.042715271 | 6.852013142 | -4.174724416 | 0.00484049 | 0.0729461 | -2.16073576 | down |
| hsa_circ_0031806 | -1.041502563 | 8.522854929 | -5.898514723 | 0.000772446 | 0.026146933 | -0.190273639 | down |
| hsa_circ_0013480 | -1.040819893 | 5.424177638 | -6.578256885 | 0.000414737 | 0.018881618 | 0.473081925 | down |
| hsa_circ_0005246 | -1.040609126 | 8.186534576 | -5.097338632 | 0.001724295 | 0.040830992 | -1.051657884 | down |
| hsa_circ_0003540 | -1.040058995 | 7.254017939 | -5.827770228 | 0.000826567 | 0.027269732 | -0.262747097 | down |
| hsa_circ_0006251 | -1.039837606 | 6.264631073 | -4.312722732 | 0.004115471 | 0.0662278 | -1.986587757 | down |
| hsa_circ_0028143 | -1.038459905 | 8.04480817 | -3.681687166 | 0.008848772 | 0.103408051 | -2.806295395 | down |
| hsa_circ_0031720 | -1.037082082 | 5.696507516 | -5.649170567 | 0.000983284 | 0.030163354 | -0.448727272 | down |
| hsa_circ_0003806 | -1.035861797 | 11.70984948 | -7.280718258 | 0.000229267 | 0.014150813 | 1.100390651 | down |
| hsa_circ_0058805 | -1.033750745 | 7.086312847 | -4.205734211 | 0.004666013 | 0.071163291 | -2.121349468 | down |
| hsa_circ_0023406 | -1.032170678 | 5.562439924 | -4.71853675 | 0.002595736 | 0.051334725 | -1.491361698 | down |
| hsa_circ_0001266 | -1.031192776 | 7.312761409 | -5.856661433 | 0.000803963 | 0.026876774 | -0.233068729 | down |
| hsa_circ_0081343 | -1.030821587 | 8.064423655 | -6.986466508 | 0.000292197 | 0.015394812 | 0.844404245 | down |
| hsa_circ_0000979 | -1.030327975 | 7.564505378 | -3.9599851 | 0.006266527 | 0.085653116 | -2.437477604 | down |
| hsa_circ_0059703 | -1.03014003 | 5.646621808 | -5.960277376 | 0.000728451 | 0.025959784 | -0.127547509 | down |
| hsa_circ_0000184 | -1.025503296 | 7.808398651 | -2.760520696 | 0.03006348 | 0.187589288 | -4.096545586 | down |
| hsa_circ_0051348 | -1.023456658 | 7.061275116 | -4.185894349 | 0.004776824 | 0.072140057 | -2.146531677 | down |
| hsa_circ_0025114 | -1.019351084 | 7.007406195 | -4.272486767 | 0.004313586 | 0.067700728 | -2.037063275 | down |
| hsa_circ_0006853 | -1.01930541 | 8.947970003 | -2.44187355 | 0.047037615 | 0.231836056 | -4.557715087 | down |
| hsa_circ_0082564 | -1.019187071 | 8.821898403 | -4.262184287 | 0.004365999 | 0.068324721 | -2.050027439 | down |
| hsa_circ_0020625 | -1.017065587 | 5.094365044 | -5.55581346 | 0.001078361 | 0.031997658 | -0.547689261 | down |
| hsa_circ_0001460 | -1.016733783 | 8.554438741 | -4.856522857 | 0.00223124 | 0.046964764 | -1.328694552 | down |
| hsa_circ_0076260 | -1.014253525 | 11.2966281 | -5.532306853 | 0.001103904 | 0.03203619 | -0.572798692 | down |
| hsa_circ_0059760 | -1.014182928 | 9.35323892 | -4.537071666 | 0.003180356 | 0.057847574 | -1.709692883 | down |
| hsa_circ_0038885 | -1.012014982 | 6.771410113 | -3.096524198 | 0.018984204 | 0.149410666 | -3.61568721 | down |
| hsa_circ_0087298 | -1.011565248 | 10.59969762 | -3.656365662 | 0.009136329 | 0.105399657 | -2.840404445 | down |
| hsa_circ_0065217 | -1.007261923 | 8.083141262 | -3.551271591 | 0.010443958 | 0.111657283 | -2.982916991 | down |
| hsa_circ_0047641 | -1.002972842 | 9.235660611 | -5.632696913 | 0.000999352 | 0.030397189 | -0.466102029 | down |

**Supplementary material Table S6** The detailed description of DEIRGs

| Name | logFC | AveExpr | t | P.Value | adj.P.Val | B | Regulation |
| --- | --- | --- | --- | --- | --- | --- | --- |
| ARG1 | 1.133403541 | 6.561081602 | 7.114815906 | 1.24E-09 | 1.95E-07 | 11.82180376 | up |
| MMP9 | 0.872794344 | 8.159300345 | 5.314229347 | 1.49E-06 | 3.69E-05 | 5.012040665 | up |
| APOBEC3A | 0.773620227 | 7.295281103 | 3.323366575 | 0.00148295 | 0.009790264 | -1.507076559 | up |
| ORM1 | 0.761014812 | 6.985284343 | 3.810893769 | 0.000316381 | 0.002735261 | -0.071506014 | up |
| S100A12 | 0.740522401 | 9.014003931 | 4.153159467 | 0.000100216 | 0.001084591 | 1.00830397 | up |
| FCGR3B | 0.69853107 | 8.480751889 | 3.013844312 | 0.003709877 | 0.020346991 | -2.347332518 | up |
| LY96 | 0.672536724 | 8.646046632 | 3.933441868 | 0.000210833 | 0.001953669 | 0.308794634 | up |
| OLFM4 | 0.671268208 | 6.253626404 | 3.224137881 | 0.002001133 | 0.012549012 | -1.782849708 | up |
| HIF1A | 0.633310339 | 6.782610208 | 3.70610547 | 0.000445256 | 0.003624065 | -0.390776066 | up |
| FCGR3A | 0.629592623 | 6.991810717 | 2.054448754 | 0.0440745 | 0.142684973 | -4.53511991 | up |
| RGS2 | 0.584508721 | 10.29254361 | 7.894297265 | 5.37E-11 | 2.30E-08 | 14.84914489 | up |
| PADI4 | 0.567511687 | 9.021326328 | 5.193302565 | 2.35E-06 | 5.32E-05 | 4.575265866 | up |
| CEACAM8 | 0.559622173 | 6.295362287 | 2.989767123 | 0.003975225 | 0.021536035 | -2.410173451 | up |
| IL1R2 | 0.55887774 | 7.954274731 | 4.063699648 | 0.000135987 | 0.001386737 | 0.720843903 | up |
| SNAP23 | 0.557135092 | 7.259733063 | 3.362010552 | 0.001317734 | 0.008853478 | -1.398102315 | up |
| LRRK2 | 0.553602148 | 7.102229444 | 5.994632603 | 1.08E-07 | 4.74E-06 | 7.530492174 | up |
| VASP | 0.549072786 | 6.876139765 | 6.361031027 | 2.53E-08 | 1.69E-06 | 8.919788197 | up |
| C5AR1 | 0.548810864 | 8.224951323 | 7.17652079 | 9.70E-10 | 1.69E-07 | 12.06098816 | up |
| TPST1 | 0.547677958 | 6.224279738 | 4.280833107 | 6.45E-05 | 0.000754047 | 1.424573719 | up |
| IRAK3 | 0.53200215 | 7.065809289 | 5.618287213 | 4.65E-07 | 1.50E-05 | 6.125808411 | up |
| DEFA4 | 0.531161725 | 7.031507716 | 2.134695449 | 0.036671924 | 0.124179318 | -4.378758702 | up |
| ABCA1 | 0.529628405 | 7.590728234 | 5.078805591 | 3.60E-06 | 7.59E-05 | 4.16530663 | up |
| HMGB2 | 0.525622566 | 7.991694614 | 2.787320242 | 0.007011218 | 0.034114912 | -2.923403702 | up |
| IRS2 | 0.522346365 | 6.904194909 | 5.210406566 | 2.20E-06 | 5.04E-05 | 4.636812839 | up |
| EIF2AK2 | 0.521354822 | 8.005775301 | 5.14886706 | 2.77E-06 | 6.09E-05 | 4.415735909 | up |
| CLEC4D | 0.517210035 | 6.048791149 | 6.135981742 | 6.17E-08 | 3.21E-06 | 8.064243203 | up |
| NFIL3 | 0.511036883 | 6.869651639 | 6.081575309 | 7.64E-08 | 3.79E-06 | 7.858443642 | up |
| RSAD2 | 0.510764867 | 6.614300812 | 2.646647538 | 0.010249571 | 0.045914826 | -3.263539954 | up |
| PRKAR1A | 0.50620051 | 8.096407669 | 2.054477234 | 0.044071659 | 0.142684973 | -4.535065342 | up |
| CTSS | 0.50436808 | 8.133271645 | 9.034470976 | 5.51E-13 | 1.14E-09 | 19.25452776 | up |
| SLC2A11 | 0.503881043 | 6.483607442 | 3.082837689 | 0.003038025 | 0.017426551 | -2.165198102 | up |
| TNFSF10 | 0.501717826 | 8.680242386 | 6.66249161 | 7.63E-09 | 6.90E-07 | 10.074882 | up |
| RBP7 | 0.501480835 | 7.031060465 | 6.329954634 | 2.87E-08 | 1.85E-06 | 8.801267922 | up |
| CD19 | -0.509270286 | 6.398959119 | -4.640445119 | 1.80E-05 | 0.000267175 | 2.632176752 | down |
| LY9 | -0.51032825 | 6.612240428 | -6.999880996 | 1.97E-09 | 2.69E-07 | 11.37674288 | down |
| IL2RB | -0.518379806 | 7.651398534 | -5.556881471 | 5.89E-07 | 1.76E-05 | 5.899212879 | down |
| ICAM2 | -0.525062381 | 8.394888583 | -8.02902392 | 3.12E-11 | 1.61E-08 | 15.37239576 | down |
| CD8A | -0.526992631 | 7.987125402 | -3.713758019 | 0.000434357 | 0.0035509 | -0.367649804 | down |
| FLT3LG | -0.540756317 | 6.541567541 | -7.727030807 | 1.05E-10 | 3.45E-08 | 14.19915509 | down |
| CD247 | -0.542765618 | 9.291410611 | -5.341584466 | 1.34E-06 | 3.42E-05 | 5.111358944 | down |
| VEGFB | -0.559983531 | 7.65082875 | -8.183855285 | 1.67E-11 | 9.16E-09 | 15.97319244 | down |
| ITPR3 | -0.569778729 | 7.327761314 | -7.356000842 | 4.71E-10 | 1.08E-07 | 12.75745785 | down |
| IL32 | -0.591522116 | 7.698609822 | -6.59190723 | 1.01E-08 | 8.61E-07 | 9.803628203 | down |
| GNLY | -0.604720836 | 8.957284828 | -3.514590438 | 0.000820388 | 0.00600104 | -0.959465385 | down |
| TNFRSF25 | -0.614550496 | 7.064178528 | -6.663463302 | 7.60E-09 | 6.90E-07 | 10.07861924 | down |
| HLA-DQB1 | -0.63318674 | 6.377365265 | -4.413028148 | 4.06E-05 | 0.000513856 | 1.862692705 | down |
| ITK | -0.642752857 | 7.816949415 | -7.729090799 | 1.05E-10 | 3.45E-08 | 14.20716143 | down |
| CD79A | -0.646980001 | 7.759734638 | -4.648940876 | 1.75E-05 | 0.000260564 | 2.661288921 | down |
| CD79B | -0.650379677 | 8.161942544 | -6.00645434 | 1.03E-07 | 4.59E-06 | 7.575015424 | down |
| CD3D | -0.707130118 | 8.874066954 | -7.173542262 | 9.82E-10 | 1.69E-07 | 12.0494391 | down |
| IL7R | -0.717920737 | 8.732156354 | -6.36087544 | 2.54E-08 | 1.69E-06 | 8.919194526 | down |
| CCR7 | -0.844986002 | 8.201038964 | -6.089329483 | 7.41E-08 | 3.71E-06 | 7.887748404 | down |

**Supplementary Material Table S7** GO terms of DEIRGs

|  |  |  |  |  |  |  |  |  |  |  |
| --- | --- | --- | --- | --- | --- | --- | --- | --- | --- | --- |
|  | ONTOLOGY | ID | Description | GeneRatio | BgRatio | pvalue | p.adjust | qvalue | geneID | Count |
| GO:0002429 | BP | GO:0002429 | immune response-activating cell surface receptor signaling pathway | 12/51 | 481/18862 | 4.25E-09 | 2.01E-06 | 1.44E-06 | 728/338339/2214/1236/930/919/915/973/974/3119/3384/3702 | 12 |
| GO:0002757 | BP | GO:0002757 | immune response-activating signal transduction | 12/51 | 481/18862 | 4.25E-09 | 2.01E-06 | 1.44E-06 | 728/338339/2214/1236/930/919/915/973/974/3119/3384/3702 | 12 |
| GO:0043312 | BP | GO:0043312 | neutrophil degranulation | 12/51 | 485/18862 | 4.66E-09 | 2.01E-06 | 1.44E-06 | 383/728/1088/338339/1520/1669/2215/4318/10562/5004/6283/8773 | 12 |
| GO:0002283 | BP | GO:0002283 | neutrophil activation involved in immune response | 12/51 | 488/18862 | 4.99E-09 | 2.01E-06 | 1.44E-06 | 383/728/1088/338339/1520/1669/2215/4318/10562/5004/6283/8773 | 12 |
| GO:0002446 | BP | GO:0002446 | neutrophil mediated immunity | 12/51 | 499/18862 | 6.40E-09 | 2.01E-06 | 1.44E-06 | 383/728/1088/338339/1520/1669/2215/4318/10562/5004/6283/8773 | 12 |
| GO:0042119 | BP | GO:0042119 | neutrophil activation | 12/51 | 500/18862 | 6.55E-09 | 2.01E-06 | 1.44E-06 | 383/728/1088/338339/1520/1669/2215/4318/10562/5004/6283/8773 | 12 |
| GO:0030098 | BP | GO:0030098 | lymphocyte differentiation | 10/51 | 358/18862 | 3.42E-08 | 9.02E-06 | 6.43E-06 | 91543/1236/930/915/973/974/925/3575/3702/4063 | 10 |
| GO:1903131 | BP | GO:1903131 | mononuclear cell differentiation | 10/51 | 411/18862 | 1.25E-07 | 2.87E-05 | 2.05E-05 | 91543/1236/930/915/973/974/925/3575/3702/4063 | 10 |
| GO:0001819 | BP | GO:0001819 | positive regulation of cytokine production | 9/51 | 437/18862 | 2.27E-06 | 0.000419354 | 0.000299153 | 728/5610/3091/3148/23643/5004/91543/1236/4063 | 9 |
| GO:0050851 | BP | GO:0050851 | antigen receptor-mediated signaling pathway | 8/51 | 323/18862 | 2.28E-06 | 0.000419354 | 0.000299153 | 1236/930/919/915/973/974/3119/3702 | 8 |
| GO:0050832 | BP | GO:0050832 | defense response to fungus | 4/51 | 39/18862 | 3.64E-06 | 0.000609146 | 0.000434545 | 383/1669/6283/10578 | 4 |
| GO:0030217 | BP | GO:0030217 | T cell differentiation | 7/51 | 246/18862 | 4.18E-06 | 0.000625634 | 0.000446307 | 91543/1236/915/925/3575/3702/4063 | 7 |
| GO:0042110 | BP | GO:0042110 | T cell activation | 9/51 | 474/18862 | 4.41E-06 | 0.000625634 | 0.000446307 | 383/5573/91543/1236/915/925/3575/3702/4063 | 9 |
| GO:2000107 | BP | GO:2000107 | negative regulation of leukocyte apoptotic process | 4/51 | 46/18862 | 7.11E-06 | 0.000936412 | 0.000668006 | 3091/8660/1236/3575 | 4 |
| GO:0046651 | BP | GO:0046651 | lymphocyte proliferation | 7/51 | 282/18862 | 1.02E-05 | 0.001256066 | 0.000896037 | 383/8660/5573/930/973/2323/3575 | 7 |
| GO:0032943 | BP | GO:0032943 | mononuclear cell proliferation | 7/51 | 285/18862 | 1.10E-05 | 0.001261327 | 0.00089979 | 383/8660/5573/930/973/2323/3575 | 7 |
| GO:0009620 | BP | GO:0009620 | response to fungus | 4/51 | 53/18862 | 1.26E-05 | 0.001364639 | 0.000973489 | 383/1669/6283/10578 | 4 |
| GO:0006968 | BP | GO:0006968 | cellular defense response | 4/51 | 54/18862 | 1.36E-05 | 0.001389161 | 0.000990983 | 728/23643/10578/3702 | 4 |
| GO:0070661 | BP | GO:0070661 | leukocyte proliferation | 7/51 | 312/18862 | 1.96E-05 | 0.001905982 | 0.001359666 | 383/8660/5573/930/973/2323/3575 | 7 |
| GO:0032496 | BP | GO:0032496 | response to lipopolysaccharide | 7/51 | 326/18862 | 2.60E-05 | 0.002399283 | 0.001711572 | 383/728/1669/3148/11213/23643/1236 | 7 |
| GO:0031640 | BP | GO:0031640 | killing of cells of other organism | 4/51 | 67/18862 | 3.20E-05 | 0.00281211 | 0.002006069 | 383/1669/6283/10578 | 4 |
| GO:0002237 | BP | GO:0002237 | response to molecule of bacterial origin | 7/51 | 346/18862 | 3.81E-05 | 0.003187961 | 0.002274188 | 383/728/1669/3148/11213/23643/1236 | 7 |
| GO:0031349 | BP | GO:0031349 | positive regulation of defense response | 7/51 | 361/18862 | 4.98E-05 | 0.003989923 | 0.002846283 | 383/338339/3148/120892/6283/1236/3384 | 7 |
| GO:0002460 | BP | GO:0002460 | adaptive immune response based on somatic recombination of immune receptors built from immunoglobulin superfamily domains | 7/51 | 367/18862 | 5.53E-05 | 0.0042429 | 0.003026748 | 383/91543/930/925/3119/3575/4063 | 7 |
| GO:2000106 | BP | GO:2000106 | regulation of leukocyte apoptotic process | 4/51 | 80/18862 | 6.44E-05 | 0.004749692 | 0.003388278 | 3091/8660/1236/3575 | 4 |
| GO:0006959 | BP | GO:0006959 | humoral immune response | 7/51 | 380/18862 | 6.88E-05 | 0.004875222 | 0.003477826 | 728/1669/6283/1236/930/10578/3119 | 7 |
| GO:0070229 | BP | GO:0070229 | negative regulation of lymphocyte apoptotic process | 3/51 | 31/18862 | 7.94E-05 | 0.005416583 | 0.003864016 | 3091/8660/3575 | 3 |
| GO:0001906 | BP | GO:0001906 | cell killing | 5/51 | 179/18862 | 0.000120062 | 0.007902661 | 0.005637504 | 383/1669/6283/10578/3575 | 5 |
| GO:0042100 | BP | GO:0042100 | B cell proliferation | 4/51 | 96/18862 | 0.000131088 | 0.008330863 | 0.005942969 | 8660/930/973/3575 | 4 |
| GO:0050830 | BP | GO:0050830 | defense response to Gram-positive bacterium | 4/51 | 98/18862 | 0.000141979 | 0.008722215 | 0.006222148 | 728/1669/3148/3575 | 4 |
| GO:0071887 | BP | GO:0071887 | leukocyte apoptotic process | 4/51 | 102/18862 | 0.000165704 | 0.00985138 | 0.007027658 | 3091/8660/1236/3575 | 4 |
| GO:0002456 | BP | GO:0002456 | T cell mediated immunity | 4/51 | 104/18862 | 0.000178584 | 0.010285318 | 0.007337215 | 383/91543/925/3575 | 4 |
| GO:0001938 | BP | GO:0001938 | positive regulation of endothelial cell proliferation | 4/51 | 108/18862 | 0.000206491 | 0.011311167 | 0.008069022 | 383/3091/3148/7423 | 4 |
| GO:0032963 | BP | GO:0032963 | collagen metabolic process | 4/51 | 109/18862 | 0.000213931 | 0.011311167 | 0.008069022 | 383/1520/3091/4318 | 4 |
| GO:0050679 | BP | GO:0050679 | positive regulation of epithelial cell proliferation | 5/51 | 203/18862 | 0.000215967 | 0.011311167 | 0.008069022 | 383/728/3091/3148/7423 | 5 |
| GO:0050852 | BP | GO:0050852 | T cell receptor signaling pathway | 5/51 | 204/18862 | 0.000220945 | 0.011311167 | 0.008069022 | 1236/919/915/3119/3702 | 5 |
| GO:0045058 | BP | GO:0045058 | T cell selection | 3/51 | 48/18862 | 0.000295608 | 0.014724498 | 0.010503982 | 1236/915/4063 | 3 |
| GO:0042742 | BP | GO:0042742 | defense response to bacterium | 6/51 | 344/18862 | 0.000317686 | 0.015407766 | 0.010991404 | 728/1669/3148/6283/10578/3575 | 6 |
| GO:0000302 | BP | GO:0000302 | response to reactive oxygen species | 5/51 | 224/18862 | 0.000340163 | 0.015673013 | 0.011180623 | 383/3091/120892/4318/1236 | 5 |
| GO:2001234 | BP | GO:2001234 | negative regulation of apoptotic signaling pathway | 5/51 | 224/18862 | 0.000340163 | 0.015673013 | 0.011180623 | 3091/3148/120892/4318/8743 | 5 |
| GO:2000551 | BP | GO:2000551 | regulation of T-helper 2 cell cytokine production | 2/51 | 11/18862 | 0.000388132 | 0.017165142 | 0.01224506 | 383/91543 | 2 |
| GO:0002449 | BP | GO:0002449 | lymphocyte mediated immunity | 6/51 | 360/18862 | 0.000404656 | 0.017165142 | 0.01224506 | 383/91543/930/925/3119/3575 | 6 |
| GO:0019882 | BP | GO:0019882 | antigen processing and presentation | 5/51 | 234/18862 | 0.000415491 | 0.017165142 | 0.01224506 | 1520/8773/1236/925/3119 | 5 |
| GO:0045071 | BP | GO:0045071 | negative regulation of viral genome replication | 3/51 | 54/18862 | 0.000419116 | 0.017165142 | 0.01224506 | 200315/5610/91543 | 3 |
| GO:0070228 | BP | GO:0070228 | regulation of lymphocyte apoptotic process | 3/51 | 54/18862 | 0.000419116 | 0.017165142 | 0.01224506 | 3091/8660/3575 | 3 |
| GO:0032494 | BP | GO:0032494 | response to peptidoglycan | 2/51 | 12/18862 | 0.000464953 | 0.018424731 | 0.01314361 | 728/11213 | 2 |
| GO:0050853 | BP | GO:0050853 | B cell receptor signaling pathway | 4/51 | 134/18862 | 0.000469866 | 0.018424731 | 0.01314361 | 930/973/974/3702 | 4 |
| GO:0035745 | BP | GO:0035745 | T-helper 2 cell cytokine production | 2/51 | 13/18862 | 0.00054854 | 0.021061638 | 0.015024694 | 383/91543 | 2 |
| GO:0032890 | BP | GO:0032890 | regulation of organic acid transport | 3/51 | 60/18862 | 0.000571659 | 0.021501386 | 0.015338396 | 383/8660/5997 | 3 |
| GO:0002833 | BP | GO:0002833 | positive regulation of response to biotic stimulus | 5/51 | 258/18862 | 0.000647448 | 0.02386494 | 0.01702448 | 383/338339/3148/23643/3384 | 5 |
| GO:0002696 | BP | GO:0002696 | positive regulation of leukocyte activation | 6/51 | 401/18862 | 0.000713767 | 0.025602899 | 0.018264283 | 338339/8660/120892/1236/2323/3575 | 6 |
| GO:0046007 | BP | GO:0046007 | negative regulation of activated T cell proliferation | 2/51 | 15/18862 | 0.000735868 | 0.025602899 | 0.018264283 | 383/5573 | 2 |
| GO:0010821 | BP | GO:0010821 | regulation of mitochondrion organization | 4/51 | 151/18862 | 0.000736274 | 0.025602899 | 0.018264283 | 3091/120892/4318/8743 | 4 |
| GO:0050867 | BP | GO:0050867 | positive regulation of cell activation | 6/51 | 412/18862 | 0.000821739 | 0.028045654 | 0.020006866 | 338339/8660/120892/1236/2323/3575 | 6 |
| GO:0002224 | BP | GO:0002224 | toll-like receptor signaling pathway | 4/51 | 157/18862 | 0.000851595 | 0.028536159 | 0.020356777 | 1520/11213/23643/91543 | 4 |
| GO:0010517 | BP | GO:0010517 | regulation of phospholipase activity | 3/51 | 70/18862 | 0.00089724 | 0.029355556 | 0.020941308 | 728/5997/3702 | 3 |
| GO:0002831 | BP | GO:0002831 | regulation of response to biotic stimulus | 6/51 | 420/18862 | 0.000907904 | 0.029355556 | 0.020941308 | 383/338339/3148/11213/23643/3384 | 6 |
| GO:0070227 | BP | GO:0070227 | lymphocyte apoptotic process | 3/51 | 71/18862 | 0.000935046 | 0.029711893 | 0.021195507 | 3091/8660/3575 | 3 |
| GO:0033077 | BP | GO:0033077 | T cell differentiation in thymus | 3/51 | 73/18862 | 0.001013658 | 0.031663934 | 0.022588031 | 1236/915/3575 | 3 |
| GO:0032695 | BP | GO:0032695 | negative regulation of interleukin-12 production | 2/51 | 18/18862 | 0.001066717 | 0.032228842 | 0.022991018 | 11213/1236 | 2 |
| GO:0035743 | BP | GO:0035743 | CD4-positive, alpha-beta T cell cytokine production | 2/51 | 18/18862 | 0.001066717 | 0.032228842 | 0.022991018 | 383/91543 | 2 |
| GO:0001960 | BP | GO:0001960 | negative regulation of cytokine-mediated signaling pathway | 3/51 | 76/18862 | 0.001139228 | 0.03386446 | 0.024157815 | 383/7850/11213 | 3 |
| GO:0034121 | BP | GO:0034121 | regulation of toll-like receptor signaling pathway | 3/51 | 77/18862 | 0.001183164 | 0.034612249 | 0.024691263 | 11213/23643/91543 | 3 |
| GO:0002709 | BP | GO:0002709 | regulation of T cell mediated immunity | 3/51 | 78/18862 | 0.001228157 | 0.03482298 | 0.024841592 | 383/91543/3575 | 3 |
| GO:0061844 | BP | GO:0061844 | antimicrobial humoral immune response mediated by antimicrobial peptide | 3/51 | 78/18862 | 0.001228157 | 0.03482298 | 0.024841592 | 1669/6283/10578 | 3 |
| GO:0010042 | BP | GO:0010042 | response to manganese ion | 2/51 | 20/18862 | 0.00132011 | 0.034965771 | 0.024943455 | 383/120892 | 2 |
| GO:0032891 | BP | GO:0032891 | negative regulation of organic acid transport | 2/51 | 20/18862 | 0.00132011 | 0.034965771 | 0.024943455 | 8660/5997 | 2 |
| GO:0070233 | BP | GO:0070233 | negative regulation of T cell apoptotic process | 2/51 | 20/18862 | 0.00132011 | 0.034965771 | 0.024943455 | 3091/3575 | 2 |
| GO:0001936 | BP | GO:0001936 | regulation of endothelial cell proliferation | 4/51 | 177/18862 | 0.001328054 | 0.034965771 | 0.024943455 | 383/3091/3148/7423 | 4 |
| GO:0001959 | BP | GO:0001959 | regulation of cytokine-mediated signaling pathway | 4/51 | 177/18862 | 0.001328054 | 0.034965771 | 0.024943455 | 383/3091/7850/11213 | 4 |
| GO:0060761 | BP | GO:0060761 | negative regulation of response to cytokine stimulus | 3/51 | 81/18862 | 0.00136957 | 0.035052252 | 0.025005148 | 383/7850/11213 | 3 |
| GO:0060326 | BP | GO:0060326 | cell chemotaxis | 5/51 | 306/18862 | 0.001387298 | 0.035052252 | 0.025005148 | 728/3148/6283/1236/7423 | 5 |
| GO:0019932 | BP | GO:0019932 | second-messenger-mediated signaling | 5/51 | 307/18862 | 0.001407415 | 0.035052252 | 0.025005148 | 120892/5573/5997/1236/3710 | 5 |
| GO:0043405 | BP | GO:0043405 | regulation of MAP kinase activity | 5/51 | 307/18862 | 0.001407415 | 0.035052252 | 0.025005148 | 728/11213/120892/5997/6283 | 5 |
| GO:0045069 | BP | GO:0045069 | regulation of viral genome replication | 3/51 | 83/18862 | 0.001469302 | 0.036105648 | 0.025756606 | 200315/5610/91543 | 3 |
| GO:0002718 | BP | GO:0002718 | regulation of cytokine production involved in immune response | 3/51 | 84/18862 | 0.001520832 | 0.036159094 | 0.025794733 | 383/11213/91543 | 3 |
| GO:0010822 | BP | GO:0010822 | positive regulation of mitochondrion organization | 3/51 | 84/18862 | 0.001520832 | 0.036159094 | 0.025794733 | 3091/4318/8743 | 3 |
| GO:0002697 | BP | GO:0002697 | regulation of immune effector process | 6/51 | 465/18862 | 0.001530336 | 0.036159094 | 0.025794733 | 383/728/11213/91543/930/3575 | 6 |
| GO:0045088 | BP | GO:0045088 | regulation of innate immune response | 5/51 | 315/18862 | 0.001576214 | 0.03639217 | 0.025961002 | 383/338339/3148/11213/3384 | 5 |
| GO:0002710 | BP | GO:0002710 | negative regulation of T cell mediated immunity | 2/51 | 22/18862 | 0.001599439 | 0.03639217 | 0.025961002 | 383/3575 | 2 |
| GO:0045061 | BP | GO:0045061 | thymic T cell selection | 2/51 | 22/18862 | 0.001599439 | 0.03639217 | 0.025961002 | 1236/915 | 2 |
| GO:0043271 | BP | GO:0043271 | negative regulation of ion transport | 5/51 | 319/18862 | 0.001666002 | 0.036774965 | 0.026234075 | 8660/120892/4318/5997/91543 | 5 |
| GO:0060759 | BP | GO:0060759 | regulation of response to cytokine stimulus | 4/51 | 189/18862 | 0.001689649 | 0.036774965 | 0.026234075 | 383/3091/7850/11213 | 4 |
| GO:0023061 | BP | GO:0023061 | signal release | 6/51 | 475/18862 | 0.001704683 | 0.036774965 | 0.026234075 | 19/3091/8660/120892/8773/3710 | 6 |
| GO:0002532 | BP | GO:0002532 | production of molecular mediator involved in inflammatory response | 3/51 | 88/18862 | 0.001738263 | 0.036774965 | 0.026234075 | 3091/7850/8773 | 3 |
| GO:0010738 | BP | GO:0010738 | regulation of protein kinase A signaling | 2/51 | 23/18862 | 0.001748743 | 0.036774965 | 0.026234075 | 120892/5573 | 2 |
| GO:0035162 | BP | GO:0035162 | embryonic hemopoiesis | 2/51 | 23/18862 | 0.001748743 | 0.036774965 | 0.026234075 | 3091/2323 | 2 |
| GO:0001935 | BP | GO:0001935 | endothelial cell proliferation | 4/51 | 191/18862 | 0.00175594 | 0.036774965 | 0.026234075 | 383/3091/3148/7423 | 4 |
| GO:0048525 | BP | GO:0048525 | negative regulation of viral process | 3/51 | 89/18862 | 0.001795492 | 0.037180803 | 0.026523587 | 200315/5610/91543 | 3 |
| GO:0042113 | BP | GO:0042113 | B cell activation | 5/51 | 326/18862 | 0.001832125 | 0.037517847 | 0.026764024 | 8660/930/973/974/3575 | 5 |
| GO:0090023 | BP | GO:0090023 | positive regulation of neutrophil chemotaxis | 2/51 | 24/18862 | 0.001904428 | 0.038331516 | 0.027344469 | 728/1236 | 2 |
| GO:0002690 | BP | GO:0002690 | positive regulation of leukocyte chemotaxis | 3/51 | 91/18862 | 0.001913456 | 0.038331516 | 0.027344469 | 728/1236/7423 | 3 |
| GO:0043903 | BP | GO:0043903 | regulation of biological process involved in symbiotic interaction | 4/51 | 197/18862 | 0.001965642 | 0.038539121 | 0.027492568 | 200315/383/5610/91543 | 4 |
| GO:0071222 | BP | GO:0071222 | cellular response to lipopolysaccharide | 4/51 | 197/18862 | 0.001965642 | 0.038539121 | 0.027492568 | 383/1669/3148/23643 | 4 |
| GO:0071900 | BP | GO:0071900 | regulation of protein serine/threonine kinase activity | 6/51 | 492/18862 | 0.002035393 | 0.03908987 | 0.027885454 | 728/11213/120892/5573/5997/6283 | 6 |
| GO:0002367 | BP | GO:0002367 | cytokine production involved in immune response | 3/51 | 93/18862 | 0.002036152 | 0.03908987 | 0.027885454 | 383/11213/91543 | 3 |
| GO:2001243 | BP | GO:2001243 | negative regulation of intrinsic apoptotic signaling pathway | 3/51 | 95/18862 | 0.002163645 | 0.041109259 | 0.029326021 | 3091/120892/4318 | 3 |
| GO:0002719 | BP | GO:0002719 | negative regulation of cytokine production involved in immune response | 2/51 | 26/18862 | 0.002234802 | 0.041603436 | 0.029678551 | 383/11213 | 2 |
| GO:0071377 | BP | GO:0071377 | cellular response to glucagon stimulus | 2/51 | 26/18862 | 0.002234802 | 0.041603436 | 0.029678551 | 383/5573 | 2 |
| GO:0060191 | BP | GO:0060191 | regulation of lipase activity | 3/51 | 97/18862 | 0.002296002 | 0.041958937 | 0.029932154 | 728/5997/3702 | 3 |
| GO:0002221 | BP | GO:0002221 | pattern recognition receptor signaling pathway | 4/51 | 208/18862 | 0.002394139 | 0.041958937 | 0.029932154 | 1520/11213/23643/91543 | 4 |
| GO:0010955 | BP | GO:0010955 | negative regulation of protein processing | 2/51 | 27/18862 | 0.002409424 | 0.041958937 | 0.029932154 | 7850/120892 | 2 |
| GO:0071624 | BP | GO:0071624 | positive regulation of granulocyte chemotaxis | 2/51 | 27/18862 | 0.002409424 | 0.041958937 | 0.029932154 | 728/1236 | 2 |
| GO:0090200 | BP | GO:0090200 | positive regulation of release of cytochrome c from mitochondria | 2/51 | 27/18862 | 0.002409424 | 0.041958937 | 0.029932154 | 4318/8743 | 2 |
| GO:1903318 | BP | GO:1903318 | negative regulation of protein maturation | 2/51 | 27/18862 | 0.002409424 | 0.041958937 | 0.029932154 | 7850/120892 | 2 |
| GO:2001233 | BP | GO:2001233 | regulation of apoptotic signaling pathway | 5/51 | 348/18862 | 0.002433834 | 0.041958937 | 0.029932154 | 3091/3148/120892/4318/8743 | 5 |
| GO:0071219 | BP | GO:0071219 | cellular response to molecule of bacterial origin | 4/51 | 209/18862 | 0.002436032 | 0.041958937 | 0.029932154 | 383/1669/3148/23643 | 4 |
| GO:0010038 | BP | GO:0010038 | response to metal ion | 5/51 | 352/18862 | 0.00255705 | 0.04363558 | 0.031128217 | 383/3091/120892/4318/3710 | 5 |
| GO:0010575 | BP | GO:0010575 | positive regulation of vascular endothelial growth factor production | 2/51 | 28/18862 | 0.00259029 | 0.043797283 | 0.031243571 | 728/3091 | 2 |
| GO:0030593 | BP | GO:0030593 | neutrophil chemotaxis | 3/51 | 103/18862 | 0.002722878 | 0.045097461 | 0.032171076 | 728/6283/1236 | 3 |
| GO:0050690 | BP | GO:0050690 | regulation of defense response to virus by virus | 2/51 | 29/18862 | 0.002777366 | 0.045097461 | 0.032171076 | 5610/919 | 2 |
| GO:1902624 | BP | GO:1902624 | positive regulation of neutrophil migration | 2/51 | 29/18862 | 0.002777366 | 0.045097461 | 0.032171076 | 728/1236 | 2 |
| GO:0009615 | BP | GO:0009615 | response to virus | 5/51 | 359/18862 | 0.002783529 | 0.045097461 | 0.032171076 | 200315/5610/3091/11213/91543 | 5 |
| GO:1903792 | BP | GO:1903792 | negative regulation of anion transport | 4/51 | 217/18862 | 0.002789534 | 0.045097461 | 0.032171076 | 8660/120892/5997/91543 | 4 |
| GO:0097529 | BP | GO:0097529 | myeloid leukocyte migration | 4/51 | 218/18862 | 0.002836062 | 0.045450984 | 0.032423268 | 728/6283/1236/7423 | 4 |
| GO:0062207 | BP | GO:0062207 | regulation of pattern recognition receptor signaling pathway | 3/51 | 105/18862 | 0.002875309 | 0.045682712 | 0.032588575 | 11213/23643/91543 | 3 |
| GO:0002828 | BP | GO:0002828 | regulation of type 2 immune response | 2/51 | 30/18862 | 0.00297062 | 0.046011394 | 0.032823046 | 383/91543 | 2 |
| GO:0038111 | BP | GO:0038111 | interleukin-7-mediated signaling pathway | 2/51 | 30/18862 | 0.00297062 | 0.046011394 | 0.032823046 | 8660/3575 | 2 |
| GO:0050670 | BP | GO:0050670 | regulation of lymphocyte proliferation | 4/51 | 221/18862 | 0.002978843 | 0.046011394 | 0.032823046 | 383/8660/5573/2323 | 4 |
| GO:0046632 | BP | GO:0046632 | alpha-beta T cell differentiation | 3/51 | 107/18862 | 0.003032907 | 0.046011394 | 0.032823046 | 91543/3702/4063 | 3 |
| GO:0001818 | BP | GO:0001818 | negative regulation of cytokine production | 5/51 | 367/18862 | 0.003059836 | 0.046011394 | 0.032823046 | 383/7850/11213/5004/1236 | 5 |
| GO:0009306 | BP | GO:0009306 | protein secretion | 5/51 | 367/18862 | 0.003059836 | 0.046011394 | 0.032823046 | 19/3091/8660/91543/3710 | 5 |
| GO:0032944 | BP | GO:0032944 | regulation of mononuclear cell proliferation | 4/51 | 223/18862 | 0.003076721 | 0.046011394 | 0.032823046 | 383/8660/5573/2323 | 4 |
| GO:0035592 | BP | GO:0035592 | establishment of protein localization to extracellular region | 5/51 | 368/18862 | 0.00309572 | 0.046011394 | 0.032823046 | 19/3091/8660/91543/3710 | 5 |
| GO:0051955 | BP | GO:0051955 | regulation of amino acid transport | 2/51 | 31/18862 | 0.003170018 | 0.046367807 | 0.0330773 | 383/5997 | 2 |
| GO:1902692 | BP | GO:1902692 | regulation of neuroblast proliferation | 2/51 | 31/18862 | 0.003170018 | 0.046367807 | 0.0330773 | 3091/120892 | 2 |
| GO:0030595 | BP | GO:0030595 | leukocyte chemotaxis | 4/51 | 226/18862 | 0.003227636 | 0.046426084 | 0.033118873 | 728/6283/1236/7423 | 4 |
| GO:0046777 | BP | GO:0046777 | protein autophosphorylation | 4/51 | 226/18862 | 0.003227636 | 0.046426084 | 0.033118873 | 5610/11213/120892/3702 | 4 |
| GO:0050678 | BP | GO:0050678 | regulation of epithelial cell proliferation | 5/51 | 374/18862 | 0.003317466 | 0.046426084 | 0.033118873 | 383/728/3091/3148/7423 | 5 |
| GO:0071692 | BP | GO:0071692 | protein localization to extracellular region | 5/51 | 375/18862 | 0.003355511 | 0.046426084 | 0.033118873 | 19/3091/8660/91543/3710 | 5 |
| GO:0007202 | BP | GO:0007202 | activation of phospholipase C activity | 2/51 | 32/18862 | 0.003375526 | 0.046426084 | 0.033118873 | 728/3702 | 2 |
| GO:0045648 | BP | GO:0045648 | positive regulation of erythrocyte differentiation | 2/51 | 32/18862 | 0.003375526 | 0.046426084 | 0.033118873 | 3091/3148 | 2 |
| GO:0071353 | BP | GO:0071353 | cellular response to interleukin-4 | 2/51 | 32/18862 | 0.003375526 | 0.046426084 | 0.033118873 | 383/4783 | 2 |
| GO:0090022 | BP | GO:0090022 | regulation of neutrophil chemotaxis | 2/51 | 32/18862 | 0.003375526 | 0.046426084 | 0.033118873 | 728/1236 | 2 |
| GO:0051209 | BP | GO:0051209 | release of sequestered calcium ion into cytosol | 3/51 | 112/18862 | 0.003449881 | 0.04709726 | 0.033597668 | 1236/930/3710 | 3 |
| GO:0051283 | BP | GO:0051283 | negative regulation of sequestering of calcium ion | 3/51 | 113/18862 | 0.003537269 | 0.047723126 | 0.034044141 | 1236/930/3710 | 3 |
| GO:0002724 | BP | GO:0002724 | regulation of T cell cytokine production | 2/51 | 33/18862 | 0.003587112 | 0.047723126 | 0.034044141 | 383/91543 | 2 |
| GO:0043552 | BP | GO:0043552 | positive regulation of phosphatidylinositol 3-kinase activity | 2/51 | 33/18862 | 0.003587112 | 0.047723126 | 0.034044141 | 1236/930 | 2 |
| GO:0071216 | BP | GO:0071216 | cellular response to biotic stimulus | 4/51 | 233/18862 | 0.003599302 | 0.047723126 | 0.034044141 | 383/1669/3148/23643 | 4 |
| GO:0051282 | BP | GO:0051282 | regulation of sequestering of calcium ion | 3/51 | 115/18862 | 0.003716093 | 0.048919709 | 0.034897745 | 1236/930/3710 | 3 |
| GO:0070232 | BP | GO:0070232 | regulation of T cell apoptotic process | 2/51 | 34/18862 | 0.003804742 | 0.04973148 | 0.035476836 | 3091/3575 | 2 |
| GO:0042581 | CC | GO:0042581 | specific granule | 7/52 | 160/19520 | 2.14E-07 | 2.01E-05 | 1.48E-05 | 383/1088/338339/1669/10562/5004/8773 | 7 |
| GO:0070820 | CC | GO:0070820 | tertiary granule | 7/52 | 164/19520 | 2.53E-07 | 2.01E-05 | 1.48E-05 | 1088/338339/1520/4318/10562/5004/8773 | 7 |
| GO:0009897 | CC | GO:0009897 | external side of plasma membrane | 9/52 | 402/19520 | 1.02E-06 | 5.43E-05 | 3.99E-05 | 2214/1236/930/915/973/974/925/3560/3575 | 9 |
| GO:1904724 | CC | GO:1904724 | tertiary granule lumen | 4/52 | 55/19520 | 1.38E-05 | 0.000548954 | 0.000403402 | 1520/4318/10562/5004 | 4 |
| GO:0035580 | CC | GO:0035580 | specific granule lumen | 4/52 | 62/19520 | 2.23E-05 | 0.000708501 | 0.000520646 | 383/1669/10562/5004 | 4 |
| GO:0030667 | CC | GO:0030667 | secretory granule membrane | 6/52 | 305/19520 | 0.00015412 | 0.003025772 | 0.002223507 | 728/1088/338339/2215/8773/3710 | 6 |
| GO:0098802 | CC | GO:0098802 | plasma membrane signaling receptor complex | 6/52 | 318/19520 | 0.000193237 | 0.003025772 | 0.002223507 | 919/915/973/974/925/3560 | 6 |
| GO:0034774 | CC | GO:0034774 | secretory granule lumen | 6/52 | 322/19520 | 0.000206732 | 0.003025772 | 0.002223507 | 383/1669/10562/5004/6283/7423 | 6 |
| GO:0045121 | CC | GO:0045121 | membrane raft | 6/52 | 323/19520 | 0.000210219 | 0.003025772 | 0.002223507 | 19/120892/5573/930/973/925 | 6 |
| GO:0098857 | CC | GO:0098857 | membrane microdomain | 6/52 | 323/19520 | 0.000210219 | 0.003025772 | 0.002223507 | 19/120892/5573/930/973/925 | 6 |
| GO:0060205 | CC | GO:0060205 | cytoplasmic vesicle lumen | 6/52 | 326/19520 | 0.000220961 | 0.003025772 | 0.002223507 | 383/1669/10562/5004/6283/7423 | 6 |
| GO:0031983 | CC | GO:0031983 | vesicle lumen | 6/52 | 328/19520 | 0.00022836 | 0.003025772 | 0.002223507 | 383/1669/10562/5004/6283/7423 | 6 |
| GO:0045335 | CC | GO:0045335 | phagocytic vesicle | 4/52 | 136/19520 | 0.000470946 | 0.005760036 | 0.004232797 | 19/1520/8773/10578 | 4 |
| GO:0005771 | CC | GO:0005771 | multivesicular body | 3/52 | 62/19520 | 0.000603559 | 0.006854704 | 0.00503722 | 120892/5573/973 | 3 |
| GO:0005766 | CC | GO:0005766 | primary lysosome | 4/52 | 155/19520 | 0.000769797 | 0.007649861 | 0.005621546 | 383/1088/1669/8773 | 4 |
| GO:0042582 | CC | GO:0042582 | azurophil granule | 4/52 | 155/19520 | 0.000769797 | 0.007649861 | 0.005621546 | 383/1088/1669/8773 | 4 |
| GO:0070821 | CC | GO:0070821 | tertiary granule membrane | 3/52 | 73/19520 | 0.000972315 | 0.009094004 | 0.006682783 | 1088/338339/8773 | 3 |
| GO:0030139 | CC | GO:0030139 | endocytic vesicle | 5/52 | 307/19520 | 0.001322131 | 0.011678827 | 0.008582256 | 19/1520/8773/10578/3119 | 5 |
| GO:0035579 | CC | GO:0035579 | specific granule membrane | 3/52 | 91/19520 | 0.001836264 | 0.015366629 | 0.011292259 | 1088/338339/8773 | 3 |
| GO:0031968 | CC | GO:0031968 | organelle outer membrane | 4/52 | 220/19520 | 0.0027837 | 0.021773848 | 0.016000643 | 383/120892/91543/3710 | 4 |
| GO:0019867 | CC | GO:0019867 | outer membrane | 4/52 | 222/19520 | 0.002875791 | 0.021773848 | 0.016000643 | 383/120892/91543/3710 | 4 |
| GO:0044853 | CC | GO:0044853 | plasma membrane raft | 3/52 | 111/19520 | 0.003229787 | 0.023342555 | 0.017153417 | 120892/5573/925 | 3 |
| GO:0030665 | CC | GO:0030665 | clathrin-coated vesicle membrane | 3/52 | 117/19520 | 0.003745507 | 0.025892851 | 0.019027517 | 915/3119/3575 | 3 |
| GO:0005770 | CC | GO:0005770 | late endosome | 4/52 | 275/19520 | 0.00613948 | 0.040674055 | 0.029889574 | 1520/120892/5573/973 | 4 |
| GO:0042101 | CC | GO:0042101 | T cell receptor complex | 3/52 | 152/19520 | 0.007740502 | 0.049229595 | 0.036176663 | 919/915/925 | 3 |
| GO:0140375 | MF | GO:0140375 | immune receptor activity | 6/52 | 136/18337 | 2.29E-06 | 0.000506543 | 0.000427045 | 728/7850/1236/3119/3560/3575 | 6 |
| GO:0004896 | MF | GO:0004896 | cytokine receptor activity | 4/52 | 97/18337 | 0.000163959 | 0.018117443 | 0.015274053 | 7850/1236/3560/3575 | 4 |
| GO:0050786 | MF | GO:0050786 | RAGE receptor binding | 2/52 | 10/18337 | 0.000349812 | 0.018863334 | 0.015902882 | 3148/6283 | 2 |
| GO:0016813 | MF | GO:0016813 | hydrolase activity, acting on carbon-nitrogen (but not peptide) bonds, in linear amidines | 2/52 | 11/18337 | 0.000426772 | 0.018863334 | 0.015902882 | 383/23569 | 2 |
| GO:0019864 | MF | GO:0019864 | IgG binding | 2/52 | 11/18337 | 0.000426772 | 0.018863334 | 0.015902882 | 2214/2215 | 2 |
| GO:0019905 | MF | GO:0019905 | syntaxin binding | 3/52 | 77/18337 | 0.001356993 | 0.04998258 | 0.042138208 | 19/120892/8773 | 3 |

**Supplementary Material Table S8** KEGG pathways of DEIRGs

| ID | Description | GeneRatio | BgRatio | pvalue | p.adjust | qvalue | geneID | Count |
| --- | --- | --- | --- | --- | --- | --- | --- | --- |
| hsa04640 | Hematopoietic cell lineage | 7/41 | 99/8095 | 5.29E-07 | 7.98E-05 | 6.62E-05 | 7850/930/915/925/2323/3119/3575 | 7 |
| hsa05340 | Primary immunodeficiency | 5/41 | 38/8095 | 1.15E-06 | 8.68E-05 | 7.20E-05 | 930/915/973/925/3575 | 5 |
| hsa05150 | Staphylococcus aureus infection | 5/41 | 96/8095 | 0.000112917 | 0.005683472 | 0.004714766 | 728/1669/2214/2215/3119 | 5 |
| hsa04659 | Th17 cell differentiation | 5/41 | 108/8095 | 0.000196948 | 0.007434769 | 0.006167567 | 3091/919/915/3119/3560 | 5 |
| hsa04650 | Natural killer cell mediated cytotoxicity | 5/41 | 131/8095 | 0.000482785 | 0.014580101 | 0.01209503 | 2214/2215/8743/919/3384 | 5 |
| hsa04060 | Cytokine-cytokine receptor interaction | 7/41 | 295/8095 | 0.000615284 | 0.015484637 | 0.012845394 | 7850/8743/1236/3560/9235/3575/8718 | 7 |
| hsa04658 | Th1 and Th2 cell differentiation | 4/41 | 92/8095 | 0.001147262 | 0.024748086 | 0.020529956 | 919/915/3119/3560 | 4 |
| hsa04660 | T cell receptor signaling pathway | 4/41 | 104/8095 | 0.001807163 | 0.034110201 | 0.028296368 | 919/915/925/3702 | 4 |
| hsa05169 | Epstein-Barr virus infection | 5/41 | 202/8095 | 0.003324062 | 0.055770368 | 0.046264718 | 5610/930/919/915/3119 | 5 |
| hsa05140 | Leishmaniasis | 3/41 | 77/8095 | 0.006805186 | 0.088772734 | 0.073642073 | 2214/2215/3119 | 3 |
| hsa04612 | Antigen processing and presentation | 3/41 | 78/8095 | 0.007052738 | 0.088772734 | 0.073642073 | 1520/925/3119 | 3 |
| hsa04145 | Phagosome | 4/41 | 152/8095 | 0.007054787 | 0.088772734 | 0.073642073 | 1520/2214/2215/3119 | 4 |
| hsa04662 | B cell receptor signaling pathway | 3/41 | 82/8095 | 0.008096325 | 0.094041929 | 0.078013172 | 930/973/974 | 3 |
| hsa04022 | cGMP-PKG signaling pathway | 4/41 | 167/8095 | 0.009770171 | 0.101995622 | 0.084611217 | 8660/5997/7408/3710 | 4 |
| hsa05235 | PD-L1 expression and PD-1 checkpoint pathway in cancer | 3/41 | 89/8095 | 0.010132015 | 0.101995622 | 0.084611217 | 3091/919/915 | 3 |
| hsa05164 | Influenza A | 4/41 | 172/8095 | 0.010807813 | 0.101998732 | 0.084613797 | 5610/91543/8743/3119 | 4 |
| hsa05152 | Tuberculosis | 4/41 | 180/8095 | 0.012612692 | 0.107320095 | 0.089028172 | 1520/2214/2215/3119 | 4 |
| hsa04666 | Fc gamma R-mediated phagocytosis | 3/41 | 97/8095 | 0.012793124 | 0.107320095 | 0.089028172 | 2214/2215/7408 | 3 |
| hsa04061 | Viral protein interaction with cytokine and cytokine receptor | 3/41 | 100/8095 | 0.013884819 | 0.110347775 | 0.091539807 | 8743/1236/3560 | 3 |
| hsa04613 | Neutrophil extracellular trap formation | 4/41 | 190/8095 | 0.015127955 | 0.112649676 | 0.093449365 | 728/2214/2215/23569 | 4 |
| hsa05202 | Transcriptional misregulation in cancer | 4/41 | 192/8095 | 0.015666511 | 0.112649676 | 0.093449365 | 1669/7850/4318/3560 | 4 |
| hsa04670 | Leukocyte transendothelial migration | 3/41 | 114/8095 | 0.019668244 | 0.134995677 | 0.111986654 | 4318/7408/3702 | 3 |
| hsa05170 | Human immunodeficiency virus 1 infection | 4/41 | 212/8095 | 0.021727335 | 0.14264468 | 0.118331941 | 200315/919/915/3710 | 4 |
| hsa05417 | Lipid and atherosclerosis | 4/41 | 215/8095 | 0.022744965 | 0.14310374 | 0.118712757 | 19/23643/4318/8743 | 4 |
| hsa04611 | Platelet activation | 3/41 | 124/8095 | 0.024501915 | 0.146541312 | 0.121564421 | 8773/7408/3710 | 3 |
| hsa05166 | Human T-cell leukemia virus 1 infection | 4/41 | 222/8095 | 0.025232279 | 0.146541312 | 0.121564421 | 7850/915/3119/3560 | 4 |
| hsa04068 | FoxO signaling pathway | 3/41 | 131/8095 | 0.028235653 | 0.157910502 | 0.130995815 | 8660/8743/3575 | 3 |
| hsa04210 | Apoptosis | 3/41 | 136/8095 | 0.031078834 | 0.160035541 | 0.132758657 | 1520/8743/3710 | 3 |
| hsa05322 | Systemic lupus erythematosus | 3/41 | 136/8095 | 0.031078834 | 0.160035541 | 0.132758657 | 2214/2215/3119 | 3 |
| hsa04151 | PI3K-Akt signaling pathway | 5/41 | 354/8095 | 0.032008805 | 0.160035541 | 0.132758657 | 930/2323/3560/3575/7423 | 5 |
| hsa05162 | Measles | 3/41 | 139/8095 | 0.032854979 | 0.160035541 | 0.132758657 | 5610/915/3560 | 3 |
| hsa04514 | Cell adhesion molecules | 3/41 | 149/8095 | 0.039153271 | 0.184754497 | 0.153264448 | 925/3119/3384 | 3 |
| hsa05167 | Kaposi sarcoma-associated herpesvirus infection | 3/41 | 194/8095 | 0.074401709 | 0.340444186 | 0.282417972 | 5610/3091/3710 | 3 |
| hsa05205 | Proteoglycans in cancer | 3/41 | 205/8095 | 0.084624316 | 0.372087439 | 0.308667865 | 3091/4318/3710 | 3 |
| hsa05215 | Prostate cancer | 2/41 | 97/8095 | 0.086245433 | 0.372087439 | 0.308667865 | 7850/4318 | 2 |
| hsa05142 | Chagas disease | 2/41 | 102/8095 | 0.093940199 | 0.383377568 | 0.318033674 | 919/915 | 2 |
| hsa05146 | Amoebiasis | 2/41 | 102/8095 | 0.093940199 | 0.383377568 | 0.318033674 | 383/7850 | 2 |
| hsa04625 | C-type lectin receptor signaling pathway | 2/41 | 104/8095 | 0.097073043 | 0.385737619 | 0.319991472 | 338339/3710 | 2 |
| hsa00220 | Arginine biosynthesis | 1/41 | 22/8095 | 0.105826516 | 0.409738562 | 0.33990163 | 383 | 1 |
| hsa05145 | Toxoplasmosis | 2/41 | 112/8095 | 0.109895887 | 0.414856973 | 0.344147646 | 23643/3119 | 2 |
| hsa04935 | Growth hormone synthesis, secretion and action | 2/41 | 119/8095 | 0.121466439 | 0.447352007 | 0.37110414 | 8660/3710 | 2 |
| hsa04380 | Osteoclast differentiation | 2/41 | 128/8095 | 0.136764867 | 0.486329743 | 0.403438406 | 2214/2215 | 2 |
| hsa04926 | Relaxin signaling pathway | 2/41 | 129/8095 | 0.138491251 | 0.486329743 | 0.403438406 | 4318/7423 | 2 |
| hsa05310 | Asthma | 1/41 | 31/8095 | 0.145896267 | 0.490792844 | 0.407140805 | 3119 | 1 |
| hsa04910 | Insulin signaling pathway | 2/41 | 137/8095 | 0.152473662 | 0.490792844 | 0.407140805 | 8660/5573 | 2 |
| hsa04915 | Estrogen signaling pathway | 2/41 | 138/8095 | 0.154241553 | 0.490792844 | 0.407140805 | 4318/3710 | 2 |
| hsa04130 | SNARE interactions in vesicular transport | 1/41 | 33/8095 | 0.154559806 | 0.490792844 | 0.407140805 | 8773 | 1 |
| hsa05418 | Fluid shear stress and atherosclerosis | 2/41 | 139/8095 | 0.156013619 | 0.490792844 | 0.407140805 | 7850/4318 | 2 |
| hsa04140 | Autophagy - animal | 2/41 | 141/8095 | 0.159569944 | 0.491735949 | 0.407923164 | 3091/8660 | 2 |
| hsa05330 | Allograft rejection | 1/41 | 38/8095 | 0.175845282 | 0.514800922 | 0.427056882 | 3119 | 1 |
| hsa04921 | Oxytocin signaling pathway | 2/41 | 154/8095 | 0.183039939 | 0.514800922 | 0.427056882 | 5997/3710 | 2 |
| hsa05219 | Bladder cancer | 1/41 | 41/8095 | 0.188364645 | 0.514800922 | 0.427056882 | 4318 | 1 |
| hsa05160 | Hepatitis C | 2/41 | 157/8095 | 0.18853195 | 0.514800922 | 0.427056882 | 5610/91543 | 2 |
| hsa04217 | Necroptosis | 2/41 | 159/8095 | 0.192206848 | 0.514800922 | 0.427056882 | 5610/8743 | 2 |
| hsa05332 | Graft-versus-host disease | 1/41 | 42/8095 | 0.192496387 | 0.514800922 | 0.427056882 | 3119 | 1 |
| hsa04940 | Type I diabetes mellitus | 1/41 | 43/8095 | 0.196607607 | 0.514800922 | 0.427056882 | 3119 | 1 |
| hsa04975 | Fat digestion and absorption | 1/41 | 43/8095 | 0.196607607 | 0.514800922 | 0.427056882 | 19 | 1 |
| hsa04630 | JAK-STAT signaling pathway | 2/41 | 162/8095 | 0.197738103 | 0.514800922 | 0.427056882 | 3560/3575 | 2 |
| hsa02010 | ABC transporters | 1/41 | 45/8095 | 0.204768874 | 0.524069491 | 0.434745691 | 19 | 1 |
| hsa04930 | Type II diabetes mellitus | 1/41 | 46/8095 | 0.208819119 | 0.525528117 | 0.435955705 | 8660 | 1 |
| hsa04672 | Intestinal immune network for IgA production | 1/41 | 49/8095 | 0.220849478 | 0.54669297 | 0.453513164 | 3119 | 1 |
| hsa04979 | Cholesterol metabolism | 1/41 | 50/8095 | 0.224819795 | 0.547544984 | 0.454219959 | 19 | 1 |
| hsa00330 | Arginine and proline metabolism | 1/41 | 51/8095 | 0.228770371 | 0.548322636 | 0.454865066 | 383 | 1 |
| hsa05320 | Autoimmune thyroid disease | 1/41 | 53/8095 | 0.236612685 | 0.554816149 | 0.460251807 | 3119 | 1 |
| hsa04621 | NOD-like receptor signaling pathway | 2/41 | 184/8095 | 0.238828143 | 0.554816149 | 0.460251807 | 1669/3710 | 2 |
| hsa04923 | Regulation of lipolysis in adipocytes | 1/41 | 57/8095 | 0.252064608 | 0.561052617 | 0.465425315 | 8660 | 1 |
| hsa04062 | Chemokine signaling pathway | 2/41 | 192/8095 | 0.25391837 | 0.561052617 | 0.465425315 | 1236/3702 | 2 |
| hsa04730 | Long-term depression | 1/41 | 60/8095 | 0.26345288 | 0.561052617 | 0.465425315 | 3710 | 1 |
| hsa05416 | Viral myocarditis | 1/41 | 60/8095 | 0.26345288 | 0.561052617 | 0.465425315 | 3119 | 1 |
| hsa04510 | Focal adhesion | 2/41 | 201/8095 | 0.270933483 | 0.561052617 | 0.465425315 | 7408/7423 | 2 |
| hsa04213 | Longevity regulating pathway - multiple species | 1/41 | 62/8095 | 0.27095089 | 0.561052617 | 0.465425315 | 8660 | 1 |
| hsa04929 | GnRH secretion | 1/41 | 64/8095 | 0.278374414 | 0.561052617 | 0.465425315 | 3710 | 1 |
| hsa04927 | Cortisol synthesis and secretion | 1/41 | 65/8095 | 0.282058469 | 0.561052617 | 0.465425315 | 3710 | 1 |
| hsa05321 | Inflammatory bowel disease | 1/41 | 65/8095 | 0.282058469 | 0.561052617 | 0.465425315 | 3119 | 1 |
| hsa04015 | Rap1 signaling pathway | 2/41 | 210/8095 | 0.287954185 | 0.561052617 | 0.465425315 | 7408/7423 | 2 |
| hsa04720 | Long-term potentiation | 1/41 | 67/8095 | 0.289371615 | 0.561052617 | 0.465425315 | 3710 | 1 |
| hsa04920 | Adipocytokine signaling pathway | 1/41 | 69/8095 | 0.296612065 | 0.561052617 | 0.465425315 | 8660 | 1 |
| hsa04924 | Renin secretion | 1/41 | 69/8095 | 0.296612065 | 0.561052617 | 0.465425315 | 3710 | 1 |
| hsa05211 | Renal cell carcinoma | 1/41 | 69/8095 | 0.296612065 | 0.561052617 | 0.465425315 | 3091 | 1 |
| hsa05230 | Central carbon metabolism in cancer | 1/41 | 70/8095 | 0.300205251 | 0.561052617 | 0.465425315 | 3091 | 1 |
| hsa04137 | Mitophagy - animal | 1/41 | 72/8095 | 0.307337978 | 0.561052617 | 0.465425315 | 3091 | 1 |
| hsa05010 | Alzheimer disease | 3/41 | 384/8095 | 0.307920556 | 0.561052617 | 0.465425315 | 5610/8660/3710 | 3 |
| hsa01230 | Biosynthesis of amino acids | 1/41 | 75/8095 | 0.317904263 | 0.561052617 | 0.465425315 | 383 | 1 |
| hsa04918 | Thyroid hormone synthesis | 1/41 | 75/8095 | 0.317904263 | 0.561052617 | 0.465425315 | 3710 | 1 |
| hsa04971 | Gastric acid secretion | 1/41 | 76/8095 | 0.321391286 | 0.561052617 | 0.465425315 | 3710 | 1 |
| hsa05133 | Pertussis | 1/41 | 76/8095 | 0.321391286 | 0.561052617 | 0.465425315 | 23643 | 1 |
| hsa04014 | Ras signaling pathway | 2/41 | 232/8095 | 0.329380137 | 0.561052617 | 0.465425315 | 2323/7423 | 2 |
| hsa05171 | Coronavirus disease - COVID-19 | 2/41 | 232/8095 | 0.329380137 | 0.561052617 | 0.465425315 | 728/5610 | 2 |
| hsa04020 | Calcium signaling pathway | 2/41 | 240/8095 | 0.344318678 | 0.561052617 | 0.465425315 | 3710/7423 | 2 |
| hsa04610 | Complement and coagulation cascades | 1/41 | 85/8095 | 0.352001841 | 0.561052617 | 0.465425315 | 728 | 1 |
| hsa04742 | Taste transduction | 1/41 | 86/8095 | 0.355318686 | 0.561052617 | 0.465425315 | 3710 | 1 |
| hsa04911 | Insulin secretion | 1/41 | 86/8095 | 0.355318686 | 0.561052617 | 0.465425315 | 3710 | 1 |
| hsa05132 | Salmonella infection | 2/41 | 249/8095 | 0.361009651 | 0.561052617 | 0.465425315 | 23643/8743 | 2 |
| hsa04540 | Gap junction | 1/41 | 88/8095 | 0.361902759 | 0.561052617 | 0.465425315 | 3710 | 1 |
| hsa04211 | Longevity regulating pathway | 1/41 | 89/8095 | 0.365170148 | 0.561052617 | 0.465425315 | 8660 | 1 |
| hsa04912 | GnRH signaling pathway | 1/41 | 93/8095 | 0.378077252 | 0.561052617 | 0.465425315 | 3710 | 1 |
| hsa04970 | Salivary secretion | 1/41 | 93/8095 | 0.378077252 | 0.561052617 | 0.465425315 | 3710 | 1 |
| hsa05323 | Rheumatoid arthritis | 1/41 | 93/8095 | 0.378077252 | 0.561052617 | 0.465425315 | 3119 | 1 |
| hsa04657 | IL-17 signaling pathway | 1/41 | 94/8095 | 0.381263809 | 0.561052617 | 0.465425315 | 4318 | 1 |
| hsa04070 | Phosphatidylinositol signaling system | 1/41 | 97/8095 | 0.390728207 | 0.561052617 | 0.465425315 | 3710 | 1 |
| hsa04713 | Circadian entrainment | 1/41 | 97/8095 | 0.390728207 | 0.561052617 | 0.465425315 | 3710 | 1 |
| hsa05012 | Parkinson disease | 2/41 | 266/8095 | 0.392129586 | 0.561052617 | 0.465425315 | 120892/3710 | 2 |
| hsa01522 | Endocrine resistance | 1/41 | 98/8095 | 0.393851506 | 0.561052617 | 0.465425315 | 4318 | 1 |
| hsa04750 | Inflammatory mediator regulation of TRP channels | 1/41 | 98/8095 | 0.393851506 | 0.561052617 | 0.465425315 | 3710 | 1 |
| hsa04925 | Aldosterone synthesis and secretion | 1/41 | 98/8095 | 0.393851506 | 0.561052617 | 0.465425315 | 3710 | 1 |
| hsa05231 | Choline metabolism in cancer | 1/41 | 98/8095 | 0.393851506 | 0.561052617 | 0.465425315 | 3091 | 1 |
| hsa04933 | AGE-RAGE signaling pathway in diabetic complications | 1/41 | 100/8095 | 0.400051313 | 0.564179711 | 0.468019419 | 7423 | 1 |
| hsa04972 | Pancreatic secretion | 1/41 | 102/8095 | 0.406189238 | 0.564179711 | 0.468019419 | 3710 | 1 |
| hsa04064 | NF-kappa B signaling pathway | 1/41 | 104/8095 | 0.412265884 | 0.564179711 | 0.468019419 | 23643 | 1 |
| hsa04620 | Toll-like receptor signaling pathway | 1/41 | 104/8095 | 0.412265884 | 0.564179711 | 0.468019419 | 23643 | 1 |
| hsa04928 | Parathyroid hormone synthesis, secretion and action | 1/41 | 106/8095 | 0.418281847 | 0.564179711 | 0.468019419 | 3710 | 1 |
| hsa04922 | Glucagon signaling pathway | 1/41 | 107/8095 | 0.421267257 | 0.564179711 | 0.468019419 | 3710 | 1 |
| hsa04931 | Insulin resistance | 1/41 | 108/8095 | 0.424237718 | 0.564179711 | 0.468019419 | 8660 | 1 |
| hsa04066 | HIF-1 signaling pathway | 1/41 | 109/8095 | 0.427193303 | 0.564179711 | 0.468019419 | 3091 | 1 |
| hsa04668 | TNF signaling pathway | 1/41 | 112/8095 | 0.435971522 | 0.564179711 | 0.468019419 | 4318 | 1 |
| hsa04725 | Cholinergic synapse | 1/41 | 113/8095 | 0.438868324 | 0.564179711 | 0.468019419 | 3710 | 1 |
| hsa04724 | Glutamatergic synapse | 1/41 | 114/8095 | 0.441750609 | 0.564179711 | 0.468019419 | 3710 | 1 |
| hsa04010 | MAPK signaling pathway | 2/41 | 294/8095 | 0.441937066 | 0.564179711 | 0.468019419 | 2323/7423 | 2 |
| hsa04726 | Serotonergic synapse | 1/41 | 115/8095 | 0.444618448 | 0.564179711 | 0.468019419 | 3710 | 1 |
| hsa04722 | Neurotrophin signaling pathway | 1/41 | 119/8095 | 0.455946755 | 0.571233066 | 0.473870581 | 11213 | 1 |
| hsa04152 | AMPK signaling pathway | 1/41 | 120/8095 | 0.458743417 | 0.571233066 | 0.473870581 | 8660 | 1 |
| hsa04919 | Thyroid hormone signaling pathway | 1/41 | 121/8095 | 0.461526053 | 0.571233066 | 0.473870581 | 3091 | 1 |
| hsa05206 | MicroRNAs in cancer | 2/41 | 310/8095 | 0.469442331 | 0.576307252 | 0.478079909 | 8660/4318 | 2 |
| hsa04142 | Lysosome | 1/41 | 128/8095 | 0.480617465 | 0.585268042 | 0.485513398 | 1520 | 1 |
| hsa04114 | Oocyte meiosis | 1/41 | 131/8095 | 0.48859585 | 0.587173859 | 0.487094383 | 3710 | 1 |
| hsa04728 | Dopaminergic synapse | 1/41 | 132/8095 | 0.491228644 | 0.587173859 | 0.487094383 | 3710 | 1 |
| hsa04270 | Vascular smooth muscle contraction | 1/41 | 133/8095 | 0.493848212 | 0.587173859 | 0.487094383 | 3710 | 1 |
| hsa05135 | Yersinia infection | 1/41 | 137/8095 | 0.504195527 | 0.593172405 | 0.492070521 | 925 | 1 |
| hsa04371 | Apelin signaling pathway | 1/41 | 138/8095 | 0.506749935 | 0.593172405 | 0.492070521 | 3710 | 1 |
| hsa05017 | Spinocerebellar ataxia | 1/41 | 143/8095 | 0.519330617 | 0.603222485 | 0.500407639 | 3710 | 1 |
| hsa04723 | Retrograde endocannabinoid signaling | 1/41 | 148/8095 | 0.53159805 | 0.612758058 | 0.508317943 | 3710 | 1 |
| hsa04932 | Non-alcoholic fatty liver disease | 1/41 | 155/8095 | 0.548260654 | 0.620444704 | 0.514694456 | 8660 | 1 |
| hsa04934 | Cushing syndrome | 1/41 | 155/8095 | 0.548260654 | 0.620444704 | 0.514694456 | 3710 | 1 |
| hsa04218 | Cellular senescence | 1/41 | 156/8095 | 0.550593313 | 0.620444704 | 0.514694456 | 3710 | 1 |
| hsa05161 | Hepatitis B | 1/41 | 162/8095 | 0.564344468 | 0.631229738 | 0.523641261 | 4318 | 1 |
| hsa04530 | Tight junction | 1/41 | 169/8095 | 0.579869111 | 0.643825263 | 0.534089971 | 7408 | 1 |
| hsa04141 | Protein processing in endoplasmic reticulum | 1/41 | 171/8095 | 0.584204689 | 0.643904438 | 0.534155651 | 5610 | 1 |
| hsa05130 | Pathogenic Escherichia coli infection | 1/41 | 197/8095 | 0.636746091 | 0.696729419 | 0.577977001 | 8743 | 1 |
| hsa05415 | Diabetic cardiomyopathy | 1/41 | 203/8095 | 0.647918073 | 0.70079875 | 0.581352745 | 4318 | 1 |
| hsa05203 | Viral carcinogenesis | 1/41 | 204/8095 | 0.649747186 | 0.70079875 | 0.581352745 | 5610 | 1 |
| hsa05208 | Chemical carcinogenesis - reactive oxygen species | 1/41 | 223/8095 | 0.682789864 | 0.729570048 | 0.605220186 | 3091 | 1 |
| hsa05163 | Human cytomegalovirus infection | 1/41 | 225/8095 | 0.68608574 | 0.729570048 | 0.605220186 | 3710 | 1 |
| hsa05022 | Pathways of neurodegeneration - multiple diseases | 2/41 | 476/8095 | 0.703895347 | 0.743274107 | 0.616588489 | 120892/3710 | 2 |
| hsa05131 | Shigellosis | 1/41 | 247/8095 | 0.720205934 | 0.75235272 | 0.624119719 | 3710 | 1 |
| hsa05168 | Herpes simplex virus 1 infection | 2/41 | 497/8095 | 0.726703503 | 0.75235272 | 0.624119719 | 5610/3119 | 2 |
| hsa04144 | Endocytosis | 1/41 | 252/8095 | 0.727440378 | 0.75235272 | 0.624119719 | 3560 | 1 |
| hsa05020 | Prion disease | 1/41 | 273/8095 | 0.755882647 | 0.776450882 | 0.644110526 | 3710 | 1 |
| hsa05165 | Human papillomavirus infection | 1/41 | 331/8095 | 0.820223187 | 0.836849333 | 0.694214504 | 5610 | 1 |
| hsa04080 | Neuroactive ligand-receptor interaction | 1/41 | 341/8095 | 0.829499607 | 0.84063383 | 0.697353962 | 728 | 1 |
| hsa05014 | Amyotrophic lateral sclerosis | 1/41 | 365/8095 | 0.8498989 | 0.855564892 | 0.709740134 | 3710 | 1 |
| hsa04740 | Olfactory transduction | 1/41 | 441/8095 | 0.900001765 | 0.900001765 | 0.746603067 | 5997 | 1 |

**Supplementary Material Table S9** The nodes of AISIRC network

| name | Type | Attribute |
| --- | --- | --- |
| CEACAM8 | gene | up |
| PRKAR1A | gene | up |
| OLFM4 | gene | up |
| RGS2 | gene | up |
| HIF1A | gene | up |
| IRAK3 | gene | up |
| IL1R2 | gene | up |
| MMP9 | gene | up |
| TNFSF10 | gene | up |
| SLC2A11 | gene | up |
| FCGR3B | gene | up |
| ORM1 | gene | up |
| APOBEC3A | gene | up |
| CTSS | gene | up |
| EIF2AK2 | gene | up |
| IRS2 | gene | up |
| DEFA4 | gene | up |
| C5AR1 | gene | up |
| FCGR3A | gene | up |
| IL7R | gene | down |
| CD79A | gene | down |
| ITK | gene | down |
| GNLY | gene | down |
| CD79B | gene | down |
| IL2RB | gene | down |
| HLA-DQB1 | gene | down |
| hsa-miR-342-3p | miRNA | up |
| hsa_circ_0002938 | circRNA | down |
| hsa-miR-125b-2-3p | miRNA | up |
| hsa_circ_0030428 | circRNA | down |
| hsa-miR-146b-5p | miRNA | up |
| hsa_circ_0024144 | circRNA | down |
| hsa_circ_0030131 | circRNA | down |
| hsa-miR-877-5p | miRNA | up |
| hsa_circ_0007482 | circRNA | down |
| hsa-miR-185-5p | miRNA | down |
| hsa_circ_0008420 | circRNA | up |
| hsa_circ_0007364 | circRNA | up |
| hsa_circ_0045128 | circRNA | up |
| hsa_circ_0000479 | circRNA | up |
| hsa-miR-942-5p | miRNA | down |
| hsa-miR-3184-5p | miRNA | down |
| hsa_circ_0047460 | circRNA | up |
| hsa-miR-101-3p | miRNA | down |
| hsa_circ_0085045 | circRNA | up |
| hsa-miR-18a-5p | miRNA | down |
| hsa_circ_0078162 | circRNA | up |
| hsa-miR-181a-2-3p | miRNA | down |
| hsa_circ_0003572 | circRNA | up |
| hsa-let-7f-5p | miRNA | down |
| hsa_circ_0001009 | circRNA | up |
| hsa-miR-18a-3p | miRNA | down |
| hsa_circ_0017252 | circRNA | up |

**Supplementary Material Table S10**  The edges of AISIRC network

| hsa-miR-342-3p (interacts with) HLA-DQB1 |
| --- |
| hsa_circ_0002938 (interacts with) hsa-miR-342-3p |
| hsa-miR-125b-2-3p (interacts with) HLA-DQB1 |
| hsa-miR-125b-2-3p (interacts with) IL2RB |
| hsa_circ_0030428 (interacts with) hsa-miR-125b-2-3p |
| hsa-miR-146b-5p (interacts with) CD79B |
| hsa_circ_0024144 (interacts with) hsa-miR-146b-5p |
| hsa_circ_0030131 (interacts with) hsa-miR-877-5p |
| hsa-miR-877-5p (interacts with) IL7R |
| hsa-miR-877-5p (interacts with) CD79A |
| hsa-miR-877-5p (interacts with) ITK |
| hsa-miR-877-5p (interacts with) GNLY |
| hsa-miR-877-5p (interacts with) IL2RB |
| hsa_circ_0007482 (interacts with) hsa-miR-877-5p |
| hsa-miR-185-5p (interacts with) CTSS |
| hsa-miR-185-5p (interacts with) EIF2AK2 |
| hsa-miR-185-5p (interacts with) IRS2 |
| hsa-miR-185-5p (interacts with) DEFA4 |
| hsa-miR-185-5p (interacts with) C5AR1 |
| hsa-miR-185-5p (interacts with) FCGR3A |
| hsa_circ_0008420 (interacts with) hsa-miR-185-5p |
| hsa_circ_0007364 (interacts with) hsa-miR-942-5p |
| hsa_circ_0045128 (interacts with) hsa-miR-942-5p |
| hsa_circ_0000479 (interacts with) hsa-miR-942-5p |
| hsa-miR-942-5p (interacts with) TNFSF10 |
| hsa-miR-942-5p (interacts with) SLC2A11 |
| hsa-miR-942-5p (interacts with) CTSS |
| hsa-miR-942-5p (interacts with) C5AR1 |
| hsa-miR-942-5p (interacts with) FCGR3A |
| hsa-miR-942-5p (interacts with) FCGR3B |
| hsa-miR-942-5p (interacts with) ORM1 |
| hsa-miR-942-5p (interacts with) APOBEC3A |
| hsa-miR-3184-5p (interacts with) IRAK3 |
| hsa-miR-3184-5p (interacts with) IL1R2 |
| hsa-miR-3184-5p (interacts with) MMP9 |
| hsa_circ_0047460 (interacts with) hsa-miR-942-5p |
| hsa_circ_0047460 (interacts with) hsa-miR-3184-5p |
| hsa-miR-101-3p (interacts with) RGS2 |
| hsa-miR-101-3p (interacts with) HIF1A |
| hsa_circ_0085045 (interacts with) hsa-miR-101-3p |
| hsa-miR-18a-5p (interacts with) PRKAR1A |
| hsa-miR-18a-5p (interacts with) IRS2 |
| hsa-miR-18a-5p (interacts with) OLFM4 |
| hsa_circ_0078162 (interacts with) hsa-miR-18a-5p |
| hsa-miR-181a-2-3p (interacts with) SLC2A11 |
| hsa-miR-181a-2-3p (interacts with) CTSS |
| hsa_circ_0003572 (interacts with) hsa-miR-181a-2-3p |
| hsa-let-7f-5p (interacts with) OLFM4 |
| hsa_circ_0001009 (interacts with) hsa-let-7f-5p |
| hsa-miR-18a-3p (interacts with) TNFSF10 |
| hsa-miR-18a-3p (interacts with) CTSS |
| hsa-miR-18a-3p (interacts with) EIF2AK2 |
| hsa-miR-18a-3p (interacts with) CEACAM8 |
| hsa-miR-18a-3p (interacts with) FCGR3A |
| hsa-miR-18a-3p (interacts with) FCGR3B |
| hsa_circ_0017252 (interacts with) hsa-miR-18a-3p |
